# Supplementary material for: c-Maf restrains T-bet-driven programming of CCR6-negative group 3 innate lymphoid cells
Source: eLife. 2020 Feb 10;9:e52549. doi: 10.7554/eLife.52549 (PMC7025824; doi:10.7554/eLife.52549)
Supplement: Supplementary file 1. — NKp46+ CCR6- ILC3s were sorted from siLP of RorcCreMaffl/fl and control mice and subjected to RNA sequencing. 941 genes were identified as differentially expressed (FC >1.5, p-value<0.05). Data represent the combined analysis of three biologically independent samples. [file elife-52549-supp1.xlsx]

## Sheet: Genes up in WT NKp46+ ILC3s 
Symbol	WTILC3NCRp.norm	WTILC3NCRpII.norm	WTILC3NCRpIII.norm	MafKOILC3NCRp.norm	MafKOILC3NCRpII.norm	MafKOILC3NCRpIII.norm	gr_WTILC3NCRp_vs_MafKOILC3NCRp_log2FoldChange	gr_WTILC3NCRp_vs_MafKOILC3NCRp_pvalue
Gda	439.893	401.047	543.771	0	4.38215	1.99396	7.81882	2.0803e-37
Maf	779.142	704.625	644.421	0	5.47769	8.97283	7.2205	2.0941e-69
Sh3pxd2b	36.1866	15.2296	22.2214	0	0	0	7.02881	6.86105e-08
Nmbr	27.1399	20.3062	26.1428	0	0	0	7.02723	4.60531e-08
Ak5	11.3083	30.4593	16.9928	0	0	0	6.71243	4.83969e-07
1700113H08Rik	21.4858	39.5971	31.3714	0	0	0.996981	6.40023	4.68696e-07
Stab2	105.167	310.685	237.9	2.9174	0	4.98491	6.34631	2.08717e-13
Gdpd1	41.8407	49.7502	20.9143	0.972467	1.09554	0	5.79389	2.16567e-07
St6gal1	104.036	124.883	129.407	5.8348	0	1.99396	5.46284	9.52455e-22
Zbtb7c	6.78498	24.3674	16.9928	0	1.09554	0	5.46033	6.17208e-05
Kir3dl1	2.26166	9.13779	20.9143	0.972467	0	0	4.86787	0.000968295
Ass1	5.65415	11.1684	14.3786	0	1.09554	0	4.82519	0.000661705
Epn3	2.26166	43.6583	10.4571	0	0	1.99396	4.80769	0.000299248
Ckap4	7.91581	3.04593	3.92143	0	0	0	4.72346	0.00441221
Blk	31.6632	116.761	77.1214	1.94493	3.28661	3.98793	4.62119	2.97833e-13
Procr	3.39249	2.03062	7.84285	0	0	0	4.54125	0.00846855
Pla2g7	11.3083	7.10717	5.22857	0.972467	0	0	4.43474	0.00258803
Eps8l2	4.52332	1.01531	6.53571	0	0	0	4.40616	0.0137832
H2-Q2	47.4949	50.7655	49.6714	0	3.28661	3.98793	4.3699	2.21955e-11
Ankmy1	3.39249	6.09186	1.30714	0	0	0	4.27671	0.0191232
Vdr	230.689	667.058	580.371	14.587	32.8661	38.8823	4.0993	6.93152e-12
Ecscr	4.52332	0	5.22857	0	0	0	4.0986	0.0426804
St8sia6	3.39249	6.09186	0	0	0	0	4.09398	0.0431611
Ccdc162	48.6257	46.7042	77.1214	2.9174	2.19107	4.98491	4.07689	1.66063e-12
Klf5	1.13083	4.06124	3.92143	0	0	0	4.01584	0.0350807
Ifi204	42.9715	46.7042	40.5214	1.94493	2.19107	3.98793	4.00027	2.18206e-10
Tmem144	2.26166	4.06124	2.61428	0	0	0	3.99439	0.0343631
Gcnt3	2.26166	5.07655	1.30714	0	0	0	3.9565	0.0413785
Cdcp1	1.13083	6.09186	1.30714	0	0	0	3.93972	0.0476173
Smyd1	2.26166	4.06124	10.4571	0	1.09554	0	3.91876	0.0142078
Chn1	9.04664	7.10717	14.3786	0	0	1.99396	3.90092	0.00249773
Igf2	2.26166	2.03062	3.92143	0	0	0	3.85706	0.0467531
Sgms2	2.26166	2.03062	3.92143	0	0	0	3.85706	0.0467531
Plxnd1	73.504	94.4238	67.9714	9.72467	2.19107	4.98491	3.78005	4.47737e-16
Dlk1	1.13083	6.09186	7.84285	0	1.09554	0	3.77364	0.0216561
Fmn1	32.7941	32.4899	45.75	0.972467	2.19107	4.98491	3.76259	1.11993e-08
Cxcl1	514.528	755.39	390.835	48.6233	37.2483	47.8551	3.63333	2.16618e-51
Adamts9	4.52332	11.1684	20.9143	0	1.09554	1.99396	3.56631	0.00160678
Sh3gl3	1.13083	5.07655	6.53571	0.972467	0	0	3.53201	0.0370143
4932438H23Rik	15.8316	30.4593	35.2928	3.88987	2.19107	0.996981	3.51553	1.99331e-06
Fam195a	125.522	193.924	205.221	11.6696	17.5286	17.9457	3.4805	3.68165e-28
Slc32a1	5.65415	3.04593	2.61428	0.972467	0	0	3.37005	0.0475176
Plxdc1	4.52332	4.06124	2.61428	0.972467	0	0	3.35864	0.0477157
B4galnt4	35.0557	27.4134	31.3714	3.88987	2.19107	2.99094	3.35732	1.67131e-07
Slc30a3	6.78498	11.1684	11.7643	0	2.19107	0.996981	3.26334	0.00372503
Lpcat2	16.9625	24.3674	13.0714	4.86233	0	0.996981	3.18039	0.000191827
Sort1	9.04664	1.01531	7.84285	1.94493	0	0	3.14435	0.0364584
Vill	32.7941	89.3472	81.0428	1.94493	13.1464	8.97283	3.09807	1.60157e-09
S1pr3	320.025	344.19	236.593	29.174	51.4902	26.9185	3.07957	2.93355e-35
Myof	261.222	480.241	386.914	42.7885	47.1081	43.8672	3.07898	4.49124e-38
Ccr2	497.565	657.921	956.828	65.1553	112.84	78.7615	3.04366	2.70403e-39
Aqp5	5.65415	11.1684	7.84285	0	1.09554	1.99396	3.01285	0.0102168
Rab13	32.7941	32.4899	24.8357	3.88987	4.38215	2.99094	3.00945	7.77675e-07
Fam167a	48.6257	176.664	147.707	9.72467	24.1018	12.9608	3.00728	5.52862e-12
Vamp5	23.7474	9.13779	7.84285	0.972467	3.28661	0.996981	2.98681	0.00161793
Fcrl1	3.39249	10.1531	16.9928	0.972467	2.19107	0.996981	2.88449	0.00681875
Pcdh7	0	11.1684	10.4571	0	0	2.99094	2.83567	0.0477504
Nav2	13.57	8.12248	6.53571	0.972467	2.19107	0.996981	2.78655	0.00747233
Cdc42bpb	1.13083	25.3827	15.6857	0	3.28661	2.99094	2.77276	0.00726118
Gja1	16.9625	56.8573	37.9071	2.9174	8.7643	4.98491	2.76692	3.70533e-06
Podnl1	1772.01	1119.89	1262.7	246.034	171.999	198.399	2.75062	3.49765e-54
Chd5	10.1775	10.1531	6.53571	2.9174	0	0.996981	2.74622	0.0105918
Fam20a	44.1024	74.1176	37.9071	7.77973	7.66876	7.97585	2.74465	5.27943e-09
Cpne7	130.045	59.9033	64.05	22.3667	5.47769	10.9668	2.69506	1.10479e-09
Rnase4	603.863	640.66	589.521	101.137	85.4519	117.644	2.58915	9.05685e-63
Col16a1	7.91581	6.09186	3.92143	0.972467	1.09554	0.996981	2.55801	0.0375247
Sntb1	213.727	145.189	160.778	30.1465	20.8152	36.8883	2.55715	4.72711e-21
Entpd1	97.2514	44.6736	43.1357	8.7522	13.1464	9.96981	2.5459	1.67589e-08
Itga9	21.4858	16.245	32.6786	4.86233	3.28661	3.98793	2.5187	9.2631e-05
Cxcl2	1634.05	3191.12	2790.75	281.043	670.469	378.853	2.51763	5.38765e-08
Tns1	15.8316	18.2756	11.7643	0	4.38215	3.98793	2.48343	0.00203748
Cd14	6.78498	12.1837	7.84285	1.94493	0	2.99094	2.41942	0.0173948
Ube2l6	27.1399	39.5971	39.2143	5.8348	5.47769	8.97283	2.38021	2.97143e-06
Ednrb	53.149	67.0104	37.9071	8.7522	14.242	7.97585	2.36989	5.06059e-08
Pga5	1.13083	22.3368	7.84285	2.9174	3.28661	0	2.35774	0.031255
Fbxo47	6.78498	11.1684	2.61428	0.972467	1.09554	1.99396	2.35619	0.0391049
Acacb	14.7008	16.245	14.3786	4.86233	3.28661	0.996981	2.30875	0.00237254
Il2	185.456	101.531	96.7285	26.2566	36.1527	16.9487	2.2814	1.07644e-11
Ptgs1	68.9806	77.1635	50.9785	11.6696	14.242	14.9547	2.27825	1.17772e-09
Ccl9	11.3083	9.13779	18.3	1.94493	5.47769	0.996981	2.21833	0.00781552
Dppa2	238.605	334.037	329.4	44.7335	58.0635	94.7132	2.19059	1.46047e-19
Rnf144a	205.811	208.138	245.743	47.6509	32.8661	63.8068	2.18423	7.41622e-21
Myl10	7.91581	4.06124	15.6857	2.9174	1.09554	1.99396	2.1686	0.0266683
Slc7a8	3.39249	19.2909	18.3	2.9174	2.19107	3.98793	2.16449	0.0103384
Src	101.775	155.342	125.486	23.3392	25.1974	36.8883	2.16394	6.25599e-14
Slc16a7	7.91581	6.09186	9.14999	0.972467	3.28661	0.996981	2.16022	0.0349916
Marcks	15.8316	5.07655	10.4571	2.9174	1.09554	2.99094	2.14096	0.0182406
Hmga2	12.4391	4.06124	5.22857	1.94493	2.19107	0.996981	2.08757	0.0493999
Cyp39a1	11.3083	19.2909	11.7643	3.88987	2.19107	3.98793	2.07094	0.00579289
Ang	40.7099	49.7502	54.9	7.77973	13.1464	13.9577	2.06245	7.22857e-07
Arl5c	802.889	2866.22	2912.31	587.37	469.985	562.297	2.02263	0.000275756
Mpped2	6.78498	11.1684	6.53571	0.972467	1.09554	3.98793	2.0163	0.0409448
Stau2	46.364	51.7808	32.6786	7.77973	9.85983	14.9547	2.01118	5.44009e-06
Selp	6.78498	3.04593	19.6071	0	4.38215	2.99094	1.99847	0.0497956
Clu	12.4391	69.0411	31.3714	11.6696	12.0509	4.98491	1.98596	0.00079171
Il17a	13.57	22.3368	3.92143	2.9174	3.28661	3.98793	1.98562	0.0152087
Zeb2	26.0091	37.5665	15.6857	4.86233	6.57322	8.97283	1.97039	0.000541843
Prom1	9.04664	18.2756	3.92143	4.86233	2.19107	0.996981	1.96599	0.0329567
Ppp1r14c	265.745	172.603	207.836	81.6872	46.0126	39.8793	1.94186	1.71424e-13
Gprc5a	46.364	49.7502	53.5928	9.72467	19.7197	9.96981	1.93778	1.96656e-06
Ffar2	523.574	467.042	563.378	152.677	128.178	124.623	1.93508	3.90988e-36
Srsf12	16.9625	9.13779	13.0714	1.94493	5.47769	2.99094	1.92488	0.01242
Shroom4	7.91581	7.10717	11.7643	1.94493	1.09554	3.98793	1.90851	0.0378978
Cdk14	589.162	454.859	473.185	181.851	119.414	107.674	1.88899	9.65152e-23
Fzd4	136.83	147.22	177.771	33.0639	46.0126	45.8611	1.88668	1.03957e-14
Mei1	7.91581	5.07655	16.9928	3.88987	2.19107	1.99396	1.86565	0.036621
Rasgrp3	23.7474	5.07655	9.14999	1.94493	7.66876	0.996981	1.86368	0.0348604
Ppm1l	90.4664	160.419	125.486	24.3117	30.675	48.8521	1.85936	1.43685e-09
Tmem154	956.682	966.575	742.457	262.566	195.006	285.137	1.84272	6.63927e-31
Arl11	14.7008	10.1531	11.7643	1.94493	4.38215	3.98793	1.83609	0.0170321
Adrb2	407.099	440.644	386.914	134.2	86.5474	125.62	1.83021	1.582e-25
Eif4ebp1	46.364	38.5818	44.4428	10.6971	14.242	11.9638	1.8126	1.0957e-05
Gbp10	57.6723	45.6889	27.45	13.6145	12.0509	11.9638	1.80311	3.47555e-05
Ccl3	659.274	478.211	607.821	133.228	213.63	154.532	1.80194	8.42454e-23
Ltb4r1	666.059	709.701	664.028	176.989	199.388	213.354	1.79154	1.76503e-41
Tff2	116.475	348.251	166.007	76.8249	18.6241	88.7313	1.77515	0.0188374
Tnxb	22.6166	26.3981	35.2928	2.9174	9.85983	11.9638	1.77176	0.00112376
Slc16a13	9.04664	7.10717	11.7643	0.972467	3.28661	3.98793	1.75955	0.0456837
Mrc2	228.428	263.981	190.843	55.4306	83.2608	66.7977	1.74153	6.10905e-16
Pvrl3	18.0933	27.4134	26.1428	3.88987	9.85983	7.97585	1.73319	0.00196444
Fads1	15.8316	17.2603	10.4571	2.9174	3.28661	6.97887	1.72822	0.014399
Fam78b	20.3549	13.199	20.9143	3.88987	6.57322	5.98189	1.7275	0.00587746
Sema4b	194.503	247.736	286.264	56.4031	92.0251	72.7796	1.72259	8.84982e-15
Bcl2l1	1701.9	2229.62	2091.43	565.003	537.909	730.787	1.71529	5.53744e-34
Laptm4b	277.053	279.21	249.664	70.9901	81.0697	93.7162	1.71526	1.39083e-20
Agr2	23.7474	87.3166	33.9857	14.587	9.85983	19.9396	1.7124	0.000618537
Peli2	10.1775	10.1531	9.14999	2.9174	2.19107	3.98793	1.69168	0.0403875
Tspan32	208.073	143.159	143.786	56.4031	43.8215	52.84	1.69072	2.81379e-12
Wbscr27	6.78498	15.2296	10.4571	3.88987	2.19107	3.98793	1.68643	0.0365703
Ccl4	1269.92	727.977	937.221	322.859	374.674	224.321	1.67147	1.02709e-16
Prdx4	40.7099	58.888	52.2857	14.587	13.1464	19.9396	1.66982	1.38696e-05
Timp2	1068.63	914.794	813.042	310.217	300.177	269.185	1.66966	2.62647e-34
Arhgef11	188.849	247.736	279.728	64.1828	73.401	87.7344	1.66708	4.96154e-15
Iffo2	29.4016	26.3981	22.2214	7.77973	12.0509	4.98491	1.66679	0.00156528
Tmem64	10385.5	9252.52	9441.49	2833.77	3131.05	3312.97	1.64822	8.90849e-66
Slc16a10	204.68	175.649	205.221	85.5771	53.6813	46.8581	1.64821	1.98613e-12
Lrrc71	32.7941	61.9339	67.9714	15.5595	18.6241	17.9457	1.64154	3.03082e-05
Agpat9	49.7565	32.4899	31.3714	12.6421	8.7643	14.9547	1.63862	0.000231649
Cpm	685.283	1289.44	1324.13	257.704	444.788	357.916	1.63772	9.71665e-06
Lpcat1	230.689	451.813	350.314	88.4945	138.038	109.668	1.62326	5.13233e-12
Scn8a	14.7008	17.2603	20.9143	5.8348	4.38215	6.97887	1.61044	0.00911116
Nudt7	26.0091	18.2756	7.84285	6.80727	5.47769	4.98491	1.60232	0.0150591
Irf5	1435.02	1899.64	1938.49	595.15	529.144	636.074	1.582	9.12357e-32
Itsn1	115.345	85.286	65.3571	30.1465	32.8661	26.9185	1.57013	3.40967e-07
Spry1	273.661	219.307	194.764	68.0727	81.0697	83.7464	1.56521	1.97139e-14
Emp1	524.705	591.926	657.492	202.273	211.439	186.436	1.5633	5.61131e-28
Asap2	20.3549	27.4134	30.0643	10.6971	8.7643	6.97887	1.55372	0.00237582
Slc7a7	36.1866	29.444	43.1357	8.7522	18.6241	9.96981	1.54871	0.000620857
Cass4	144.746	67.0104	91.4999	26.2566	48.2036	29.9094	1.54399	4.45842e-06
Ctbp2	12.4391	9.13779	16.9928	4.86233	5.47769	2.99094	1.52643	0.0340312
Enpp2	11.3083	30.4593	47.0571	3.88987	10.9554	15.9517	1.52464	0.010232
Acsl3	7.91581	19.2909	10.4571	2.9174	3.28661	6.97887	1.52132	0.0433829
Cxcl3	672.844	2274.29	2152.86	241.172	1014.47	527.403	1.51632	0.0426235
Ubtd2	13.57	10.1531	16.9928	4.86233	3.28661	5.98189	1.51023	0.0300146
Pik3c2a	100.644	125.898	107.186	27.2291	44.917	45.8611	1.50619	3.02354e-08
Slc37a2	22.6166	17.2603	20.9143	7.77973	8.7643	4.98491	1.49934	0.00830994
Osm	33.9249	32.4899	22.2214	14.587	13.1464	3.98793	1.49081	0.0036463
Hpn	9.04664	16.245	11.7643	4.86233	4.38215	3.98793	1.49065	0.0387928
Gm10197	40.7099	84.2707	73.2	17.5044	35.0572	18.9426	1.48089	0.000100987
Gas2l3	37.3174	55.842	66.6642	17.5044	20.8152	18.9426	1.47917	7.19464e-05
Yes1	45.2332	46.7042	48.3643	20.4218	15.3375	14.9547	1.46397	9.51138e-05
Enpp1	98.3822	52.7961	65.3571	22.3667	27.3884	28.9125	1.46084	1.54711e-05
Cd55	15.8316	11.1684	14.3786	8.7522	3.28661	2.99094	1.4456	0.0394391
KCTD12	578.985	433.537	528.085	220.75	179.668	171.481	1.42722	8.8426e-19
Rgmb	14.7008	32.4899	37.9071	10.6971	9.85983	10.9668	1.42707	0.00525792
Npl	123.26	126.914	158.164	37.9262	56.9679	57.8249	1.41897	8.93386e-09
Sh3d21	19.2241	25.3827	26.1428	9.72467	8.7643	7.97585	1.41669	0.00618904
Rpusd2	12.4391	17.2603	24.8357	7.77973	6.57322	5.98189	1.41327	0.0187271
Rai14	101.775	86.3013	99.3428	44.7335	39.4393	23.9276	1.4096	8.79048e-07
Ptprs	367.52	478.211	467.957	188.659	152.28	153.535	1.40808	1.0016e-17
Itgb5	203.549	211.184	160.778	71.9625	70.1144	75.7706	1.40473	6.60851e-12
4632428N05Rik	308.717	317.792	335.936	126.421	127.082	111.662	1.39792	2.77306e-18
Cd81	56.5415	56.8573	36.6	25.2841	16.4331	15.9517	1.38117	0.000276579
Plxna1	66.719	58.888	100.65	25.2841	26.2929	34.8943	1.37849	2.19892e-05
G0s2	29.4016	25.3827	35.2928	14.587	9.85983	9.96981	1.37735	0.00300983
Ahnak	1320.81	1139.18	1318.91	542.636	376.865	539.367	1.37102	1.87704e-21
Plcg1	238.605	253.827	330.707	115.724	76.6876	126.617	1.36093	8.74943e-11
S100a6	209.204	174.633	266.657	49.5958	98.5983	106.677	1.35151	1.5245e-07
Il33	15.8316	17.2603	10.4571	7.77973	3.28661	5.98189	1.35027	0.0414517
Snx30	37.3174	24.3674	13.0714	8.7522	9.85983	10.9668	1.34659	0.0122843
Fas	24.8783	58.888	35.2928	14.587	24.1018	8.97283	1.33637	0.00435756
Myo7a	65.5881	99.5003	91.4999	30.1465	33.9617	37.8853	1.33234	5.22102e-06
Slc35g1	42.9715	43.6583	16.9928	13.6145	8.7643	18.9426	1.33094	0.00612981
Asns	16.9625	77.1635	49.6714	16.5319	26.2929	14.9547	1.32499	0.00622043
Ahrr	104.036	94.4238	77.1214	24.3117	40.5349	45.8611	1.32203	7.23477e-06
Usp6nl	147.008	219.307	168.621	47.6509	92.0251	75.7706	1.31928	1.49283e-07
Adam8	117.606	249.766	197.378	60.2929	67.9233	99.6981	1.31006	1.96186e-06
Stx1a	35.0557	34.5205	33.9857	8.7522	14.242	18.9426	1.307	0.00270689
Smox	1863.61	3641.92	3002.51	926.761	1365.04	1147.53	1.3069	2.22613e-05
Plekhh3	16.9625	13.199	18.3	2.9174	8.7643	7.97585	1.30676	0.0387893
Nlrp3	80.2889	170.572	173.85	46.6784	75.5921	50.846	1.29804	1.61987e-05
Utf1	32.7941	36.5511	24.8357	17.5044	9.85983	10.9668	1.29664	0.00449378
Hes1	223.904	177.679	154.243	78.7698	71.2099	77.7645	1.28815	1.28043e-09
Btbd19	94.9897	93.4085	70.5857	31.1189	31.7706	43.8672	1.28148	8.25077e-06
Qser1	56.5415	89.3472	90.1928	26.2566	38.3438	32.9004	1.27914	3.87119e-05
Tmem37	40.7099	43.6583	32.6786	24.3117	9.85983	13.9577	1.27654	0.00275114
Tesc	41.8407	40.6124	36.6	14.587	23.0063	11.9638	1.27522	0.00166034
Tasp1	673.975	614.262	627.428	228.53	292.508	273.173	1.27191	5.09854e-21
Adrbk2	329.072	240.628	256.2	118.641	104.076	120.635	1.26453	7.18694e-12
Kcnip3	26.0091	40.6124	19.6071	15.5595	6.57322	13.9577	1.2574	0.01205
4930503L19Rik	893.356	941.192	908.464	321.886	388.916	448.642	1.24296	1.36708e-20
Ifngr2	130.045	123.868	128.1	44.7335	47.1081	69.7887	1.23902	3.40693e-07
Mxi1	246.521	423.384	351.621	139.063	138.038	157.523	1.23371	5.06596e-10
D330045A20Rik	24.8783	44.6736	23.5286	7.77973	16.4331	15.9517	1.2286	0.0107937
Sh3bgrl2	120.999	144.174	122.871	55.4306	61.3501	50.846	1.2154	1.1897e-07
Ccl20	30.5324	31.4746	31.3714	19.4493	7.66876	12.9608	1.20926	0.00821182
Art3	538.275	407.139	413.057	215.888	199.388	172.478	1.2088	1.11629e-13
Capg	2665.37	2938.31	2444.36	1233.09	1152.51	1109.64	1.20374	1.18993e-30
Acoxl	74.6348	60.9186	53.5928	28.2015	25.1974	28.9125	1.2011	0.000157345
6430571L13Rik	16.9625	33.5052	26.1428	10.6971	8.7643	13.9577	1.19671	0.0172843
Csf1	16.9625	21.3215	13.0714	3.88987	10.9554	7.97585	1.19026	0.0497372
Aldoc	30.5324	26.3981	28.7571	14.587	10.9554	11.9638	1.18693	0.00878799
Ldlr	290.623	286.317	230.057	96.2742	129.273	132.599	1.17646	2.91751e-10
Hilpda	8687.04	11453.7	11270.2	4949.85	4737.1	4247.14	1.17264	6.22354e-23
Cd83	7894.32	5144.57	2879.63	3215.95	1565.52	2295.05	1.16959	0.017083
Chst2	109.691	145.189	149.014	61.2654	63.5412	54.834	1.16893	4.44429e-07
Slc15a3	105.167	270.072	235.286	96.2742	96.4073	79.7585	1.165	3.36152e-05
AI606181	23.7474	17.2603	15.6857	10.6971	7.66876	6.97887	1.16042	0.0381048
Gm10130	28.2708	34.5205	40.5214	16.5319	20.8152	8.97283	1.16032	0.00809059
Gm527	37.3174	40.6124	28.7571	17.5044	18.6241	11.9638	1.15848	0.00533064
Bach1	274.792	135.036	226.136	119.613	77.7831	86.7374	1.1572	6.59336e-06
Csn3	20.3549	24.3674	20.9143	5.8348	9.85983	13.9577	1.15116	0.0295838
Plxnc1	44.1024	54.8267	48.3643	17.5044	25.1974	23.9276	1.15045	0.00113808
Cdk5rap1	91.5972	155.342	87.5785	78.7698	38.3438	33.8974	1.14804	0.000546578
Chd7	919.365	1184.87	1073.16	535.829	405.349	492.509	1.14726	1.37054e-16
Uevld	126.653	84.2707	95.4214	48.6233	46.0126	43.8672	1.14391	1.43538e-05
Rxra	101.775	124.883	91.4999	54.4581	49.2992	40.8762	1.14191	8.40019e-06
4932442E05Rik	123.26	128.944	108.493	58.348	52.5858	52.84	1.14097	8.54875e-07
9130023H24Rik	14.7008	20.3062	23.5286	5.8348	7.66876	12.9608	1.1407	0.0430063
Itga4	611.779	556.39	640.5	265.483	292.508	263.203	1.13871	1.4574e-18
Ehd1	2842.91	3698.77	3403.8	1595.82	1580.86	1359.88	1.13266	1.87863e-21
Metrnl	202.419	177.679	171.236	100.164	94.2162	57.8249	1.12997	4.08614e-07
Icos	5434.77	5200.42	5425.95	2712.21	2506.59	2163.45	1.12136	6.47609e-28
Dyrk2	496.434	558.42	584.293	244.089	244.305	265.197	1.12013	5.23994e-17
Aldh1b1	20.3549	21.3215	27.45	10.6971	13.1464	7.97585	1.11893	0.0265694
Etv5	262.353	184.786	194.764	100.164	86.5474	108.671	1.11788	3.92588e-08
Idi1	2177.98	2631.68	2426.06	966.632	1195.23	1178.43	1.1158	2.35684e-21
Nox1	200.157	137.067	117.643	89.4669	73.401	48.8521	1.10476	3.42233e-05
Cd28	36.1866	26.3981	19.6071	14.587	6.57322	16.9487	1.10412	0.0258651
Mmp9	58.8032	24.3674	20.9143	11.6696	10.9554	25.9215	1.09941	0.0309848
Gm4980	495.304	516.793	512.4	269.373	227.872	219.336	1.08811	1.98893e-15
Cxcl10	1786.71	1612.31	1299.3	918.981	705.526	602.177	1.07745	9.66759e-12
Xylt1	39.5791	43.6583	41.8285	20.4218	24.1018	14.9547	1.07717	0.00427323
Rab20	494.173	340.129	384.3	157.54	155.566	266.194	1.0714	3.98971e-07
S100a4	270.268	233.521	350.314	76.8249	161.044	170.484	1.06438	2.04365e-05
Hbegf	825.506	914.794	777.75	380.234	414.113	414.744	1.0602	8.92491e-19
C2cd2	153.793	126.914	133.328	71.9625	66.8278	61.8128	1.0446	1.64085e-06
Prickle1	1035.84	1536.16	1590.79	542.636	726.341	750.727	1.04361	4.28799e-10
Pydc4	58.8032	76.1482	73.2	35.0088	28.484	37.8853	1.03495	0.000515056
Coro2b	271.399	242.659	277.114	116.696	120.509	148.55	1.03402	2.32044e-09
Shisa3	24.8783	23.3521	15.6857	9.72467	9.85983	11.9638	1.02519	0.0463977
Ets2	413.884	520.854	406.521	213.943	233.349	216.345	1.01835	1.37555e-11
Phgdh	124.391	120.822	109.8	73.9075	53.6813	47.8551	1.01584	2.84922e-05
Aldh7a1	64.4573	67.0104	57.5143	29.174	32.8661	31.9034	1.01267	0.000804641
Cdkn2c	39.5791	28.4287	52.2857	16.5319	20.8152	21.9336	1.01246	0.0108051
Gatsl3	83.6814	81.2248	74.5071	37.9262	36.1527	44.8642	1.0094	0.000214295
Filip1l	606.125	678.227	592.135	278.125	333.043	332.992	0.993145	6.49591e-14
Pitpnc1	249.913	194.939	147.707	118.641	87.643	91.7223	0.992561	1.03407e-05
Il17f	353.95	772.651	418.285	297.575	288.126	192.417	0.990265	0.0151253
Inpp4a	199.026	240.628	316.328	129.338	120.509	129.608	0.990112	4.39485e-07
Hnrnpll	680.76	776.712	690.171	370.51	348.381	362.901	0.989955	2.42146e-16
Galnt6	83.6814	115.745	87.5785	41.8161	53.6813	49.8491	0.988485	0.000172295
Dpp4	145.877	172.603	126.793	61.2654	84.3564	80.7555	0.982911	1.13898e-05
Ada	96.1206	121.837	115.029	61.2654	53.6813	53.837	0.97966	3.92958e-05
Atp13a2	32.7941	28.4287	32.6786	20.4218	10.9554	15.9517	0.978456	0.0229546
Ephx1	104.036	74.1176	61.4357	51.5407	38.3438	31.9034	0.977218	0.00140901
4931440P22Rik	201.288	176.664	218.293	105.026	79.9742	116.647	0.977078	1.03439e-06
Tdrd3	459.117	500.548	471.878	239.227	267.311	222.327	0.975862	9.6215e-13
Lzts2	30.5324	35.5358	20.9143	21.3943	10.9554	11.9638	0.974792	0.0359521
Dennd5a	480.603	829.508	865.328	272.291	421.782	413.747	0.974046	3.12509e-06
Ptk2	97.2514	146.205	141.171	56.4031	67.9233	71.7827	0.972917	5.73722e-05
Lipg	20.3549	61.9339	40.5214	17.5044	30.675	14.9547	0.972169	0.0330185
Rffl	288.362	313.731	351.621	148.787	146.802	190.423	0.97001	7.62339e-09
Jazf1	30.5324	38.5818	53.5928	19.4493	27.3884	15.9517	0.965666	0.0149745
Lgals1	429.715	610.201	399.985	282.015	277.171	181.451	0.961951	1.03372e-06
Tgtp1	194.503	253.827	196.071	125.448	99.6939	106.677	0.958883	7.11404e-07
Ccrl2	3750.96	2920.03	2914.93	1809.76	1627.97	1494.47	0.958669	9.92875e-15
Zfp442	47.4949	23.3521	24.8357	13.6145	21.9107	13.9577	0.958434	0.0361479
Inpp4b	94.9897	100.516	96.7285	66.1277	33.9617	49.8491	0.956774	0.000444484
Zswim4	2598.65	3575.92	3220.8	1713.49	1556.76	1575.23	0.955339	5.55138e-15
Tiparp	4031.41	3258.13	3223.41	1785.45	1649.88	1998.95	0.951871	8.35809e-16
Oasl2	192.241	250.781	196.071	111.834	113.936	106.677	0.94664	4.48094e-07
Lif	649.096	527.961	630.042	284.933	316.61	335.983	0.94572	4.84987e-12
Cxcl9	132.307	171.587	121.564	85.5771	75.5921	60.8159	0.94295	4.5458e-05
Raver2	116.475	81.2248	87.5785	59.3205	47.1081	41.8732	0.941772	0.000459752
Cdc42ep3	651.358	491.41	541.157	340.363	292.508	246.254	0.936905	3.17585e-09
Man1a	1154.58	1202.13	1384.26	617.516	633.22	702.872	0.936196	5.7528e-16
Sema6a	68.9806	147.22	159.471	53.4857	43.8215	99.6981	0.927494	0.00570228
Antxr2	1290.28	1422.45	1359.43	721.57	716.481	703.869	0.927168	2.18858e-20
Ubl3	4012.18	4843.03	5267.78	2331.97	2454	2646.99	0.925855	6.16582e-16
Rbpj	1718.86	2335.21	2220.83	833.404	1265.35	1212.33	0.922815	5.56224e-09
2510009E07Rik	56.5415	50.7655	36.6	26.2566	25.1974	24.9245	0.919504	0.0082009
Adcy3	54.2798	43.6583	45.75	35.0088	21.9107	18.9426	0.916939	0.0110028
Tgtp2	243.128	348.251	270.578	165.319	142.42	149.547	0.916102	3.58891e-07
Gpr55	92.7281	61.9339	88.8857	37.9262	55.8724	35.8913	0.909771	0.00199286
Ski	218.25	431.507	333.321	193.521	154.471	175.469	0.909661	2.75751e-05
Nfatc1	4371.79	4832.87	4631.2	2714.15	1955.53	2699.83	0.908433	6.43551e-13
Atp8a1	461.379	460.951	453.578	239.227	207.057	286.134	0.908128	7.94702e-10
Acpp	819.852	913.779	929.378	458.032	488.61	472.569	0.908101	9.96611e-16
Crmp1	83.6814	61.9339	67.9714	38.8987	36.1527	38.8823	0.904611	0.00163489
Itpkb	309.847	317.792	402.6	207.135	157.757	184.442	0.902426	9.57302e-08
Chst1	75.7656	105.592	86.2714	36.9537	60.2545	46.8581	0.901531	0.0011547
Rmdn2	235.213	195.955	179.078	101.137	127.082	99.6981	0.900231	3.74394e-06
Myo18a	87.0739	56.8573	49.6714	36.9537	36.1527	30.9064	0.899506	0.00500233
Ifit1	55.4107	72.087	39.2143	35.0088	20.8152	33.8974	0.897126	0.0108711
Homer1	140.223	185.802	227.443	112.806	84.3564	99.6981	0.893239	4.88095e-05
Gm2a	2606.56	3402.3	3127.99	1691.12	1661.93	1572.24	0.891658	3.11513e-15
Fkbp5	655.881	605.125	520.243	353.005	368.1	240.272	0.891587	8.43029e-08
Mmd	1390.92	1105.67	1333.28	621.406	662.8	780.636	0.890448	5.76786e-12
Pon3	38.4482	81.2248	56.2071	21.3943	37.2483	36.8883	0.889126	0.0142986
Apaf1	525.836	607.155	613.05	317.997	349.476	276.164	0.888651	1.07557e-10
Zbtb16	298.539	289.363	402.6	196.438	131.464	206.375	0.885064	6.50682e-06
Trp53inp1	9921.9	9782.51	11739.4	5171.58	5803.06	6138.41	0.877559	1.5508e-16
Stxbp1	111.952	83.2554	103.264	67.1002	44.917	49.8491	0.876232	0.00076735
Susd3	130.045	129.96	132.021	71.9625	72.3054	69.7887	0.872864	3.54923e-05
Ddx28	251.044	236.567	235.286	128.366	139.133	127.614	0.87278	1.31494e-07
Pik3r2	92.7281	97.4697	95.4214	46.6784	52.5858	56.8279	0.872719	0.000381812
Grasp	320.025	291.394	325.478	174.072	142.42	194.411	0.871295	1.064e-07
Malt1	799.497	933.07	946.371	561.113	442.597	459.608	0.871202	3.10348e-11
Hlf	117.606	98.485	74.5071	62.2379	46.0126	50.846	0.870614	0.00107977
Akirin2	390.136	727.977	521.55	259.649	338.521	302.085	0.867388	1.06622e-05
Snx2	738.432	747.268	648.342	335.501	396.584	440.666	0.865275	1.50073e-10
Il12rb1	1386.4	1410.27	1143.75	689.479	789.882	687.917	0.864225	6.57942e-13
Gas2l1	54.2798	87.3166	69.2785	48.6233	41.6304	25.9215	0.863322	0.00703137
Ctss	520.182	516.793	549	232.42	359.336	283.143	0.86015	5.15237e-08
Stard4	1349.08	1215.33	1154.21	664.195	694.571	692.902	0.858618	1.3286e-15
Nr4a2	1896.4	1652.92	1479.68	904.394	960.786	916.226	0.855271	7.66828e-14
Pdk1	575.592	483.287	545.078	314.107	256.356	316.043	0.852874	1.23445e-09
Zfp930	33.9249	22.3368	33.9857	20.4218	14.242	14.9547	0.852313	0.0493531
Samsn1	5954.95	6874.66	6555.32	3425.03	3823.42	3531.31	0.846821	3.29837e-19
Abca3	367.52	332.006	386.914	164.347	205.961	235.288	0.842398	2.85191e-07
Rgcc	3119.96	2867.23	2573.76	1688.2	1622.49	1472.54	0.840167	2.94074e-15
Rassf3	437.631	650.813	660.107	275.208	346.19	355.922	0.839554	1.05089e-06
Asb2	1621.61	1282.34	1087.54	775.056	696.762	759.7	0.83929	2.97292e-09
Mki67	67.8498	41.6277	47.0571	38.8987	29.5795	18.9426	0.838543	0.0210595
Snn	39.5791	53.8114	43.1357	21.3943	28.484	26.9185	0.837002	0.0169861
Lpar6	575.592	526.946	511.093	328.694	281.553	293.112	0.836353	1.76784e-10
Far1	944.243	974.697	903.235	540.691	537.909	507.463	0.832193	9.11218e-15
Rnf128	438.762	606.14	546.385	298.547	295.795	301.088	0.830161	1.44682e-08
Lrrn2	333.595	254.843	279.728	148.787	191.719	149.547	0.826779	2.61233e-06
Heyl	89.3356	100.516	73.2	34.0363	62.4456	52.84	0.826637	0.00359255
Gpd2	573.331	591.926	505.864	309.244	293.604	341.965	0.823677	4.40305e-10
Mboat1	31.6632	56.8573	32.6786	23.3392	19.7197	25.9215	0.820044	0.0356584
Tg	243.128	247.736	220.907	148.787	159.948	95.7102	0.818593	3.9902e-05
Anxa2	608.387	455.874	471.878	304.382	308.941	258.218	0.818182	8.49721e-08
Iigp1	127.784	116.761	81.0428	48.6233	58.0635	78.7615	0.816738	0.00220844
Kif23	46.364	74.1176	78.4285	32.0914	37.2483	43.8672	0.81169	0.00958231
Cep170	386.744	283.271	197.378	180.879	144.611	169.487	0.810783	0.000195234
Ikbip	102.906	83.2554	70.5857	43.761	47.1081	55.831	0.810392	0.00261361
Gbp6	922.757	805.141	696.707	468.729	477.654	438.672	0.809226	5.99934e-10
Upp1	1839.86	2047.88	2282.27	1280.74	1191.94	1053.81	0.806528	4.92582e-12
Irf2bp2	384.482	403.078	362.078	168.237	232.254	258.218	0.805652	1.69804e-06
Mfge8	132.307	142.143	145.093	73.9075	89.834	76.7676	0.804657	0.000107269
Ly6g5b	107.429	123.868	115.029	81.6872	66.8278	49.8491	0.804171	0.000908376
Arap3	228.428	258.904	237.9	118.641	148.993	148.55	0.803965	3.2626e-06
Tnfrsf26	110.821	88.3319	92.8071	59.3205	60.2545	47.8551	0.802938	0.00122121
Adat2	42.9715	105.592	82.35	45.7059	50.3947	36.8883	0.800329	0.015927
Pdp2	45.2332	47.7196	58.8214	33.0639	26.2929	27.9155	0.791282	0.016321
Fah	249.913	241.644	262.736	156.567	138.038	140.574	0.791102	1.16231e-06
Dpep2	44.1024	35.5358	48.3643	22.3667	32.8661	18.9426	0.788184	0.0328404
Myadm	246.521	252.812	261.428	145.87	173.095	122.629	0.786664	6.19647e-06
Slc26a11	74.6348	39.5971	74.5071	50.5683	32.8661	25.9215	0.777842	0.0276782
Myc	408.23	267.026	206.528	226.585	155.566	132.599	0.777071	0.00145935
Cdk1	40.7099	44.6736	49.6714	24.3117	30.675	23.9276	0.776256	0.0242803
St3gal6	1115	1028.51	1022.19	622.379	572.966	659.005	0.771106	1.98255e-12
Crtap	41.8407	44.6736	47.0571	28.2015	26.2929	23.9276	0.766706	0.0249043
Ccnd2	2585.08	2179.87	1934.57	1731.96	1172.22	1038.85	0.76464	5.40471e-06
B3gnt5	84.8123	54.8267	65.3571	24.3117	41.6304	54.834	0.763648	0.0216245
Tnfsf11	6232	6305.07	5985.4	3304.44	4118.12	3542.27	0.756736	9.18995e-14
Tnfsf14	447.809	392.925	433.971	273.263	256.356	225.318	0.75466	1.01301e-07
Sc4mol	763.31	1093.49	918.921	437.61	644.176	567.282	0.75283	3.44967e-06
1190002N15Rik	334.726	269.057	257.507	183.796	157.757	169.487	0.752738	7.05586e-06
Tmem2	689.806	611.216	385.607	408.436	289.222	310.061	0.744114	0.000164239
Syne3	98.3822	80.2095	73.2	47.6509	46.0126	56.8279	0.743349	0.00484672
Fam73b	143.615	172.603	190.843	96.2742	107.363	99.6981	0.74029	0.000174302
C230081A13Rik	348.296	383.787	483.643	218.805	216.916	292.116	0.737146	1.94232e-05
Ptplad2	42.9715	46.7042	30.0643	23.3392	24.1018	24.9245	0.73491	0.0454676
Kras	1592.21	1838.73	1748.96	912.174	1110.87	1095.68	0.732602	1.12882e-10
Rinl	835.683	741.176	802.585	417.188	468.89	546.346	0.731776	1.72684e-08
Wdfy2	109.691	135.036	101.957	74.8799	63.5412	70.7857	0.731585	0.00144347
Slc9a9	573.331	513.747	462.728	347.171	260.738	327.01	0.728469	9.53095e-07
Fbxl3	1294.8	1345.29	1318.91	754.634	806.315	832.479	0.726376	2.84209e-13
S1pr2	171.886	201.031	189.536	135.173	102.98	101.692	0.725488	0.000171059
S100a11	556.368	514.762	488.871	304.382	353.858	287.131	0.724691	8.51315e-08
Wdr90	153.793	217.276	201.3	98.2191	120.509	128.611	0.722284	0.000348576
Dmrta1	409.36	310.685	227.443	207.135	196.101	173.475	0.718802	0.000318337
Nap1l3	47.4949	47.7196	50.9785	19.4493	28.484	40.8762	0.718721	0.041257
Ccr9	1873.79	1597.08	2241.75	1255.45	1047.33	1167.47	0.717726	5.55369e-08
Gria3	109.691	166.511	171.236	66.1277	118.318	88.7313	0.715008	0.00448082
L1cam	289.492	239.613	193.457	149.76	151.184	142.568	0.707214	0.000124778
Ikzf2	412.753	360.435	368.614	206.163	249.782	244.26	0.706627	1.48409e-06
Acot11	137.961	147.22	158.164	84.6046	96.4073	91.7223	0.700756	0.000431975
Ctsl	313.24	322.868	362.078	185.741	202.674	225.318	0.700185	4.10428e-06
P2rx7	880.917	448.767	563.378	417.188	297.986	449.639	0.699363	0.00108615
Lrp5	71.2423	53.8114	86.2714	35.9813	50.3947	43.8672	0.693886	0.019243
Rcbtb2	1176.06	965.559	934.607	682.672	552.151	666.98	0.693259	1.36584e-07
Zfp488	111.952	78.1788	104.571	69.0451	40.5349	71.7827	0.692045	0.0115521
Cd44	3554.2	4350.6	4423.37	2432.14	2611.76	2595.14	0.690483	9.26066e-11
Srebf2	1336.64	1771.72	1701.9	893.697	1063.77	1026.89	0.689108	7.70332e-08
Dtx4	583.508	521.869	584.293	277.153	373.578	397.796	0.688539	4.69035e-06
Scpep1	1523.23	1841.77	1537.2	1038.59	1081.3	930.184	0.685651	2.61832e-09
Dnah6	102.906	156.358	181.693	66.1277	96.4073	111.662	0.684348	0.0075538
Cerkl	54.2798	46.7042	61.4357	31.1189	30.675	38.8823	0.683552	0.0302599
Cd2ap	104.036	121.837	125.486	53.4857	94.2162	71.7827	0.683093	0.00555813
Zfp326	111.952	112.699	143.786	65.1553	66.8278	96.7072	0.682855	0.00416295
Fryl	1795.76	1570.68	1632.62	1217.53	846.85	1048.82	0.682379	2.65387e-07
Mllt4	150.4	181.74	207.836	117.668	88.7385	129.608	0.679284	0.00111412
Dse	184.325	83.2554	95.4214	73.9075	90.9296	62.8098	0.675122	0.0223598
Cad	1838.73	2293.58	2029.99	1277.82	1345.32	1249.22	0.670886	6.27868e-10
Rgs1	15028.7	15757.6	15884.4	9959.03	11275.3	8175.25	0.6663	7.5524e-09
Pck2	107.429	75.1329	78.4285	56.4031	44.917	62.8098	0.666296	0.0129003
Rab4a	239.736	238.598	233.978	158.512	158.853	132.599	0.6637	6.10306e-05
Pxdc1	4486	6247.2	6044.22	2271.68	3757.69	4565.18	0.663228	0.0320836
Srxn1	800.628	1176.74	1198.65	804.23	617.883	589.216	0.658379	6.76981e-05
Trf	245.39	332.006	321.557	199.356	167.617	202.387	0.657451	0.000116786
Abcg3	184.325	121.837	74.5071	102.109	52.5858	86.7374	0.657268	0.0347497
Pank3	444.416	340.129	334.628	235.337	221.298	253.233	0.65668	3.36676e-05
Nt5dc3	52.0182	55.842	50.9785	28.2015	32.8661	39.8793	0.656052	0.0373178
Hyls1	78.0273	71.0717	109.8	61.2654	49.2992	52.84	0.654291	0.0150262
Pkp3	356.211	311.7	333.321	226.585	236.636	174.472	0.651336	4.88841e-05
Irg1	80.2889	60.9186	57.5143	43.761	51.4902	31.9034	0.64897	0.0312792
Syne2	310.978	268.042	303.257	216.86	162.139	182.448	0.648547	8.04486e-05
Clec2i	339.249	211.184	288.878	211.025	144.611	178.46	0.647993	0.00135496
Sgtb	556.368	611.216	657.492	391.904	372.483	399.789	0.647203	1.68726e-07
Ppfia1	1620.48	2908.86	3097.93	1377.99	1516.22	1979.01	0.64622	0.0361596
Cd163l1	314.371	421.354	513.707	247.007	290.317	261.209	0.644615	0.000256683
Rap1gds1	870.739	746.253	696.707	595.15	461.221	423.717	0.644348	1.37318e-05
Slc25a51	646.835	849.814	839.185	541.664	520.38	432.69	0.644069	6.2063e-06
Cxcr6	31027.7	32486.9	31878.6	21715.2	19622.2	19971.5	0.63777	7.14588e-15
Il17re	478.341	624.415	681.021	353.005	413.017	381.844	0.635725	2.17415e-05
Ap5b1	68.9806	46.7042	58.8214	31.1189	36.1527	44.8642	0.635048	0.0428263
Eid1	158.316	107.623	105.879	79.7423	66.8278	92.7193	0.634572	0.00860091
Sgk1	152.662	300.532	237.9	123.503	155.566	167.493	0.632421	0.00599384
Samhd1	925.019	1003.13	962.057	578.618	641.985	645.047	0.632235	5.50793e-09
Spdya	241.998	200.016	177.771	169.209	99.6939	130.605	0.631708	0.00304467
Cdh10	79.1581	89.3472	75.8142	46.6784	58.0635	53.837	0.628896	0.0144132
Zfp942	281.577	369.573	409.135	222.695	249.782	213.354	0.627985	0.000173953
Gcnt1	667.19	811.232	716.314	398.711	598.163	425.711	0.627791	6.84478e-05
Armc5	136.83	172.603	172.543	93.3568	113.936	105.68	0.624296	0.0017507
Uap1l1	76.8964	96.4544	82.35	44.7335	53.6813	67.7947	0.624291	0.0181156
Fadd	64.4573	63.9645	64.05	51.5407	36.1527	36.8883	0.624203	0.0317552
Pcgf3	87.0739	86.3013	67.9714	46.6784	56.9679	53.837	0.622344	0.0172331
Cish	3586.99	4472.44	4718.78	2854.19	2692.83	2769.61	0.619384	3.76958e-08
Anxa1	309.847	274.134	296.721	175.044	175.286	222.327	0.619345	0.000125322
Rel	2483.3	2582.95	2711.01	1747.52	1624.68	1688.89	0.619333	8.30482e-12
Rcsd1	804.02	870.12	828.728	500.82	536.813	592.207	0.619307	7.67827e-08
Nsmf	89.3356	135.036	126.793	85.5771	70.1144	72.7796	0.618966	0.0091124
Zcchc24	159.447	118.791	133.328	105.026	77.7831	84.7434	0.617613	0.00487995
Ugcg	1377.35	1437.68	1393.41	949.127	911.487	885.319	0.616102	1.48804e-10
Psat1	83.6814	95.4391	117.643	68.0727	56.9679	67.7947	0.615525	0.0117654
Smap2	2967.3	4095.76	3788.1	2366.01	2218.46	2513.39	0.612365	6.75425e-07
Tubb6	525.836	698.533	590.828	410.381	394.393	383.838	0.612083	7.2452e-06
Rnft1	524.705	788.896	640.5	429.83	395.489	454.623	0.611171	6.81497e-05
Ninj1	481.734	661.982	602.592	402.601	392.202	349.94	0.609954	2.53584e-05
Samd9l	340.38	306.624	318.943	229.502	201.579	201.39	0.609637	3.65061e-05
B3galt5	1826.29	1859.03	1848.3	1594.85	1099.92	931.181	0.609514	0.000131149
Mgat4b	130.045	161.434	134.636	91.4119	105.172	83.7464	0.608997	0.00340216
Cep85l	167.363	124.883	150.321	90.4394	101.885	97.7042	0.608338	0.00303383
Phf6	1059.59	1066.08	1044.41	690.451	689.093	701.875	0.607096	1.0842e-09
Tnfaip1	151.531	239.613	186.921	98.2191	124.891	157.523	0.605637	0.00703158
Cd164	11896.3	12981.7	15251.7	7713.6	9338.36	9336.73	0.604702	2.19844e-07
Ranbp6	325.679	324.899	405.214	211.025	215.821	266.194	0.604173	0.000167487
Arrb1	1083.34	1143.24	1216.95	766.304	725.246	774.654	0.602665	6.56873e-09
Flna	2206.25	2313.89	2137.18	1581.23	1431.87	1371.85	0.602557	7.66066e-10
Dnajc6	184.325	215.246	237.9	106.971	140.229	172.478	0.602254	0.00293687
Glrx	287.231	311.7	230.057	195.466	189.528	163.505	0.599857	0.000433866
Cd93	1180.59	1238.68	1724.12	850.908	994.748	889.307	0.598363	3.61092e-05
Mfsd4	157.185	167.526	202.607	90.4394	143.515	114.653	0.597802	0.00465537
Adck3	413.884	685.334	647.035	404.546	365.909	383.838	0.596956	0.000542037
Kcna3	374.305	431.507	420.9	283.96	247.591	280.152	0.594735	1.90504e-05
Zap70	1477.99	2044.83	1896.66	1275.88	1218.24	1096.68	0.594006	4.66248e-06
Arl5a	650.227	634.569	671.871	392.877	477.654	426.708	0.593614	1.27896e-06
Zfr	808.543	418.308	495.407	413.298	410.826	319.034	0.591291	0.00411024
Slc25a33	151.531	138.082	162.086	99.1916	97.5028	102.689	0.590175	0.00237903
Egln3	454.594	500.548	597.364	352.033	329.757	347.946	0.589784	2.19079e-05
Heg1	540.537	449.782	467.957	344.253	314.419	310.061	0.589437	1.17606e-05
Ccdc41	100.644	118.791	124.178	68.0727	74.4965	85.7404	0.588698	0.00871032
Abhd17c	783.665	1155.42	1167.28	632.103	735.105	698.884	0.588435	9.83386e-05
Man2a2	1403.36	1844.82	1933.26	1051.24	1079.1	1316.02	0.5879	2.08598e-05
Pex13	720.339	757.421	854.871	455.114	560.915	536.376	0.587226	3.99197e-06
Hexim1	117.606	166.511	176.464	122.531	86.5474	96.7072	0.587049	0.00875407
Flcn	178.671	320.838	303.257	190.603	175.286	168.49	0.586855	0.00475517
Gm26616	90.4664	117.776	104.571	75.8524	65.7322	66.7977	0.586665	0.0117129
Nln	148.139	185.802	172.543	110.861	98.5983	127.614	0.586626	0.00276656

## Sheet: Genes up in Maf KO NKp46+ ILC3s
Symbol	WTILC3NCRp.norm	WTILC3NCRpII.norm	WTILC3NCRpIII.norm	MafKOILC3NCRp.norm	MafKOILC3NCRpII.norm	MafKOILC3NCRpIII.norm	gr_WTILC3NCRp_vs_MafKOILC3NCRp_log2FoldChange	gr_WTILC3NCRp_vs_MafKOILC3NCRp_pvalue
Clec2l	0	0	0	37.9262	13.1464	31.9034	-7.04159	5.86056e-08
Lmo1	0	0	0	27.2291	35.0572	20.9366	-7.03904	3.54666e-08
Plb1	0	0	0	17.5044	17.5286	9.96981	-6.1533	5.34594e-06
Loxl2	1.13083	0	0	20.4218	27.3884	21.9336	-5.82269	5.9106e-06
Mcf2	0	0	1.30714	9.72467	20.8152	26.9185	-5.54338	2.99026e-05
Faim2	1.13083	1.01531	0	48.6233	29.5795	19.9396	-5.43817	1.54768e-06
Entpd3	0	0	0	2.9174	8.7643	10.9668	-5.16118	0.000728432
Thbs2	1.13083	0	0	8.7522	9.85983	23.9276	-5.11314	0.000199362
Tdpoz4	2.26166	1.01531	1.30714	141.98	3.28661	1.99396	-5.00801	0.00593201
Cldn10	0	0	1.30714	17.5044	10.9554	6.97887	-4.84971	0.000488777
Ank2	0	1.01531	1.30714	15.5595	8.7643	36.8883	-4.74855	8.03803e-05
Popdc3	0	0	1.30714	21.3943	2.19107	7.97585	-4.68814	0.00157571
Serpine2	56.5415	68.0257	31.3714	905.366	2180.12	849.428	-4.65306	9.79253e-17
Syt13	0	0	0	8.7522	5.47769	0.996981	-4.59184	0.00699604
Adra1b	0	0	0	6.80727	4.38215	3.98793	-4.58836	0.00481876
Krt25	1.13083	0	0	7.77973	10.9554	9.96981	-4.54199	0.00130643
Gm9817	0	0	0	1.94493	6.57322	5.98189	-4.51601	0.00694012
Dnah12	1.13083	0	1.30714	12.6421	25.1974	13.9577	-4.48834	0.000149279
Mal	2.26166	1.01531	5.22857	64.1828	58.0635	50.846	-4.42731	3.67667e-12
Hmgcll1	0	0	0	3.88987	7.66876	1.99396	-4.41664	0.00960833
Lrrn1	0	0	0	0	5.47769	5.98189	-4.17631	0.030875
Plat	46.364	35.5358	32.6786	818.817	890.672	325.016	-4.14901	1.27438e-17
Dixdc1	0	0	0	5.8348	2.19107	2.99094	-4.12904	0.0205677
Zscan18	0	1.01531	0	7.77973	6.57322	6.97887	-4.11664	0.00535812
Nkd1	0	1.01531	0	2.9174	7.66876	9.96981	-4.0597	0.00753059
Sox5	0	0	1.30714	6.80727	4.38215	8.97283	-4.03777	0.00712027
Slc1a1	0	1.01531	0	0.972467	13.1464	5.98189	-4.02069	0.0117131
Apitd1	0	0	0	2.9174	1.09554	5.98189	-3.98906	0.0324886
Chrnb4	0	0	1.30714	8.7522	5.47769	4.98491	-3.96724	0.00862842
Nrxn3	0	0	1.30714	1.94493	9.85983	6.97887	-3.92526	0.0117177
Tmem17	0	0	0	1.94493	4.38215	2.99094	-3.87786	0.0370014
Gabra3	0	0	0	1.94493	3.28661	3.98793	-3.86566	0.0379059
Dsg2	19.2241	15.2296	6.53571	194.493	209.248	200.393	-3.84981	5.33672e-36
Gm4841	0	0	0	5.8348	2.19107	0.996981	-3.84034	0.0466615
Gzmd	0	2.03062	2.61428	40.8436	16.4331	5.98189	-3.7918	0.000134704
Mcc	1.13083	1.01531	6.53571	31.1189	17.5286	58.8219	-3.71945	6.4307e-07
Efhd1	4.52332	0	2.61428	31.1189	26.2929	32.9004	-3.71121	5.60436e-07
4930429B21Rik	1.13083	0	0	2.9174	1.09554	11.9638	-3.70405	0.0259714
Fermt2	0	0	3.92143	24.3117	14.242	6.97887	-3.68592	0.000718048
Slamf1	1.13083	0	0	8.7522	2.19107	3.98793	-3.60807	0.0257397
Ccser1	1.13083	0	0	5.8348	8.7643	0	-3.56294	0.0417954
Tmem51	1.13083	0	0	3.88987	3.28661	6.97887	-3.52659	0.0283708
Dgat2	61.0648	55.842	49.6714	627.241	459.03	813.537	-3.50884	4.93383e-57
Ceacam15	1.13083	1.01531	0	3.88987	6.57322	14.9547	-3.49987	0.00902697
Ptges	63.3265	43.6583	31.3714	635.021	536.813	341.965	-3.44332	7.44701e-42
Dmrt3	0	1.01531	0	6.80727	5.47769	0.996981	-3.43116	0.0412857
Cpb1	1.13083	0	0	5.8348	4.38215	2.99094	-3.42493	0.0352761
Ephx2	2.26166	2.03062	5.22857	29.174	23.0063	43.8672	-3.38448	5.84091e-07
Ntn1	5.65415	13.199	5.22857	96.2742	112.84	45.8611	-3.36726	9.83053e-13
Odf3l1	0	0	2.61428	4.86233	7.66876	10.9668	-3.31518	0.0130678
Klrc3	1.13083	2.03062	3.92143	32.0914	15.3375	20.9366	-3.31403	2.46247e-05
Plac8	127.784	79.1942	98.0357	1000.67	1003.51	980.033	-3.29483	1.26731e-98
Erbb2	4.52332	8.12248	10.4571	64.1828	69.0188	85.7404	-3.26024	8.25482e-14
Corin	1.13083	2.03062	2.61428	20.4218	17.5286	12.9608	-3.15611	0.000232388
Adra2a	5.65415	17.2603	14.3786	134.2	121.605	76.7676	-3.1504	2.32723e-16
Slc30a2	1.13083	0	1.30714	6.80727	8.7643	4.98491	-3.14584	0.019012
Atp1b1	14.7008	2.03062	3.92143	78.7698	56.9679	42.8702	-3.11777	2.61755e-09
Cpa3	15.8316	5.07655	23.5286	106.971	154.471	102.689	-3.0773	1.78943e-16
Cdkl4	0	1.01531	1.30714	10.6971	5.47769	2.99094	-3.0699	0.0273942
Hspb1	32.7941	7.10717	22.2214	135.173	182.955	176.466	-3.01323	2.06454e-19
Bmp2	70.1115	60.9186	48.3643	469.701	485.323	493.506	-3.00477	1.0473e-63
Piwil4	2.26166	2.03062	0	8.7522	6.57322	19.9396	-2.98094	0.00392594
Ggt1	0	4.06124	5.22857	27.2291	30.675	12.9608	-2.94941	7.9957e-05
Dscam	41.8407	43.6583	52.2857	358.84	291.413	398.793	-2.93667	1.55956e-43
Dapk1	0	1.01531	2.61428	4.86233	8.7643	12.9608	-2.93462	0.0112386
Fgfr1	3.39249	2.03062	7.84285	37.9262	30.675	23.9276	-2.85939	3.79054e-06
Ppp1r1b	4.52332	11.1684	9.14999	64.1828	63.5412	49.8491	-2.82939	1.83645e-10
Fam189a1	1.13083	2.03062	3.92143	10.6971	4.38215	33.8974	-2.82546	0.0024861
Foxs1	4.52332	5.07655	5.22857	46.6784	31.7706	25.9215	-2.8187	9.19688e-07
Batf3	7.91581	6.09186	6.53571	38.8987	59.159	44.8642	-2.79746	9.09964e-09
Slc16a2	3.39249	3.04593	1.30714	18.4769	17.5286	18.9426	-2.79673	0.0002401
Tigit	9.04664	3.04593	1.30714	40.8436	25.1974	26.9185	-2.77652	8.79936e-06
Tceal3	4.52332	4.06124	11.7643	52.5132	27.3884	50.846	-2.73234	2.96794e-07
Ifitm1	3.39249	5.07655	3.92143	14.587	40.5349	27.9155	-2.72938	3.1481e-05
H2-Oa	3.39249	0	6.53571	20.4218	18.6241	22.9306	-2.72379	0.000243126
Klri2	719.208	424.399	469.264	3929.74	3290.99	2692.85	-2.6199	3.54819e-49
Klrd1	39.5791	19.2909	3.92143	234.364	78.8787	72.7796	-2.61585	0.00566894
Samd3	4.52332	0	0	18.4769	3.28661	5.98189	-2.61384	0.027795
Nos2	536.013	551.313	793.435	3066.19	4160.85	4221.22	-2.60809	1.60384e-60
Snx7	5.65415	1.01531	2.61428	17.5044	18.6241	17.9457	-2.55845	0.000615218
Cep112	3.39249	0	5.22857	8.7522	14.242	24.9245	-2.54133	0.00274019
Arhgef17	0	5.07655	1.30714	15.5595	3.28661	18.9426	-2.51745	0.0112919
Dner	2.26166	10.1531	7.84285	57.3755	23.0063	35.8913	-2.51656	7.92011e-06
Igfbp7	80.2889	121.837	70.5857	509.572	539.004	516.436	-2.50642	4.08945e-43
Nek10	16.9625	21.3215	22.2214	93.3568	111.745	134.592	-2.49124	1.1637e-15
Atp8b4	3.39249	5.07655	2.61428	29.174	23.0063	10.9668	-2.4858	0.000433309
Agpat4	3.39249	4.06124	0	9.72467	21.9107	11.9638	-2.48031	0.00354199
Pard3	7.91581	14.2143	16.9928	64.1828	51.4902	95.7102	-2.44496	1.88152e-09
Ndnf	3.39249	1.01531	1.30714	10.6971	10.9554	8.97283	-2.42342	0.0107112
Ly6a	113.083	127.929	81.0428	495.958	925.729	307.07	-2.42241	8.35538e-07
Mapk10	114.214	83.2554	61.4357	482.343	461.221	385.832	-2.35292	9.53507e-33
Klre1	7.91581	1.01531	0	19.4493	16.4331	9.96981	-2.34083	0.00613799
Cnn3	107.429	160.419	167.314	478.454	815.08	880.334	-2.32142	1.78651e-26
Htra1	1.13083	2.03062	5.22857	8.7522	20.8152	10.9668	-2.31201	0.00635568
Sdc2	19.2241	16.245	19.6071	79.7423	60.2545	131.602	-2.30952	4.41537e-10
Kcnh7	3.39249	1.01531	0	8.7522	4.38215	8.97283	-2.29894	0.0407248
Lpar1	3.39249	12.1837	20.9143	29.174	81.0697	64.8038	-2.28105	6.31985e-06
Bend4	6.78498	5.07655	3.92143	23.3392	32.8661	20.9366	-2.276	0.000124958
Lama2	1.13083	1.01531	2.61428	8.7522	6.57322	6.97887	-2.27226	0.0337936
Slc6a7	2.26166	4.06124	1.30714	10.6971	6.57322	19.9396	-2.2519	0.00992616
Ncald	31.6632	20.3062	23.5286	154.622	86.5474	110.665	-2.22566	2.32533e-12
1700112E06Rik	0	2.03062	2.61428	5.8348	5.47769	9.96981	-2.21733	0.0466797
Cacna1g	5.65415	12.1837	16.9928	50.5683	43.8215	64.8038	-2.21072	3.16179e-07
Cntn1	168.494	158.388	163.393	822.707	677.042	702.872	-2.16879	9.25521e-53
Gng4	7.91581	8.12248	7.84285	38.8987	46.0126	21.9336	-2.15769	2.6189e-05
Scamp1	3.39249	4.06124	0	15.5595	12.0509	6.97887	-2.15579	0.0156122
Palld	9.04664	13.199	11.7643	39.8711	73.401	36.8883	-2.13466	2.12682e-06
Ddc	62.1957	32.4899	27.45	172.127	164.331	194.411	-2.11475	2.7646e-15
Klrc2	84.8123	79.1942	70.5857	417.188	326.47	274.17	-2.11474	2.3003e-25
Zfp94	2.26166	1.01531	3.92143	13.6145	5.47769	10.9668	-2.11341	0.0224696
Dsc2	9.04664	2.03062	10.4571	20.4218	46.0126	23.9276	-2.09984	0.000400355
Susd2	346.034	412.216	339.857	1626.94	1726.57	1293.08	-2.07852	3.23037e-51
Fgr	13.57	2.03062	1.30714	30.1465	14.242	26.9185	-2.07009	0.0029395
Lum	4.52332	3.04593	1.30714	4.86233	18.6241	13.9577	-2.04789	0.0167935
Plek	663.797	373.634	362.078	2246.4	1771.48	1759.67	-2.04534	3.71774e-11
Kmo	15.8316	21.3215	26.1428	73.9075	110.649	73.7766	-2.03465	1.50373e-09
Tmem132c	4.52332	1.01531	1.30714	15.5595	4.38215	7.97585	-2.03464	0.0379387
Art2b	5.65415	2.03062	1.30714	16.5319	5.47769	14.9547	-2.03349	0.0174449
Pdia5	3.39249	4.06124	5.22857	18.4769	24.1018	8.97283	-2.0298	0.00430664
Hoxa3	6.78498	3.04593	3.92143	14.587	27.3884	13.9577	-2.02282	0.00297267
Sema6d	9.04664	10.1531	1.30714	26.2566	21.9107	36.8883	-2.01131	0.000488039
Gzme	9.04664	26.3981	18.3	101.137	66.8278	49.8491	-2.01001	6.63616e-07
Cd7	693.199	545.221	533.314	2108.31	2600.81	2412.69	-2.00637	8.88553e-55
Vipr2	40.7099	17.2603	28.7571	104.054	120.509	118.641	-1.99408	2.91709e-11
Catsper2	1.13083	1.01531	5.22857	6.80727	13.1464	7.97585	-1.98023	0.0369331
Asph	87.0739	43.6583	40.5214	180.879	223.49	266.194	-1.96604	1.36716e-13
Nmrk1	287.231	378.71	333.321	1358.54	1324.5	1221.3	-1.96429	1.11492e-54
Ankrd35	4.52332	5.07655	3.92143	18.4769	14.242	19.9396	-1.95443	0.00318375
Fry	4.52332	3.04593	10.4571	19.4493	26.2929	21.9336	-1.95107	0.00135026
5033411D12Rik	2.26166	2.03062	2.61428	11.6696	9.85983	4.98491	-1.94972	0.0379958
Gzmb	1574.12	1582.87	1704.51	6702.24	8354.57	3453.54	-1.92887	1.33728e-07
2810025M15Rik	3.39249	2.03062	3.92143	11.6696	13.1464	9.96981	-1.91684	0.0174258
Wdfy3	6.78498	1.01531	9.14999	21.3943	19.7197	19.9396	-1.89679	0.00345337
Abca1	72.3731	14.2143	39.2143	207.135	116.127	139.577	-1.8821	0.00388266
Cxcr5	152.662	167.526	154.243	562.086	689.093	489.518	-1.87283	8.7912e-31
Usp18	13.57	2.03062	5.22857	35.0088	25.1974	14.9547	-1.86125	0.00333519
Atp6v0d2	130.045	48.7349	56.2071	287.85	320.992	239.276	-1.85091	3.06766e-11
Ptprz1	41.8407	45.6889	40.5214	148.787	196.101	113.656	-1.83497	4.13468e-12
Pglyrp1	36.1866	25.3827	15.6857	126.421	71.2099	76.7676	-1.8196	1.88388e-07
Arhgap32	74.6348	56.8573	64.05	249.924	218.012	213.354	-1.804	5.51299e-19
Tlr12	18.0933	7.10717	10.4571	48.6233	32.8661	40.8762	-1.78798	8.2336e-05
Aatk	56.5415	63.9645	43.1357	255.759	159.948	150.544	-1.78368	6.68948e-12
Ccdc148	10.1775	3.04593	10.4571	26.2566	28.484	24.9245	-1.77953	0.00114111
Pmp22	15.8316	28.4287	19.6071	58.348	65.7322	96.7072	-1.77905	5.73424e-07
Gzmc	1013.22	1257.97	1299.3	4795.23	4973.74	2419.67	-1.77136	1.74271e-07
Wwtr1	257.829	191.894	138.557	972.467	635.412	371.874	-1.75003	0.000120059
Gtf2ird1	4.52332	2.03062	2.61428	7.77973	12.0509	10.9668	-1.7496	0.036903
Immp2l	29.4016	26.3981	31.3714	105.999	105.172	78.7615	-1.73852	2.30076e-09
Hdgfrp3	44.1024	50.7655	61.4357	200.328	147.898	164.502	-1.72187	1.69803e-13
Cd74	377.697	295.455	198.686	994.833	853.423	1031.88	-1.72051	1.22875e-21
Slc6a13	52.0182	49.7502	50.9785	166.292	165.426	169.487	-1.71503	3.16923e-15
Zmat4	254.437	131.99	192.15	666.14	555.437	670.968	-1.71338	3.84054e-19
Ddit4	7.91581	9.13779	9.14999	45.7059	20.8152	18.9426	-1.71012	0.00180885
Slc30a4	9.04664	4.06124	0	13.6145	14.242	15.9517	-1.70791	0.0241376
Kif5c	16.9625	3.04593	7.84285	29.174	32.8661	27.9155	-1.70213	0.00166342
Gp49a	514.528	996.019	916.307	2573.15	2821.01	2478.5	-1.69761	4.18268e-21
H2-Aa	94.9897	69.0411	66.6642	276.181	212.534	258.218	-1.69459	1.63581e-16
Mypop	5.65415	2.03062	3.92143	13.6145	13.1464	9.96981	-1.67623	0.0278279
Klrb1c	1176.06	540.145	592.135	3357.93	1964.3	2009.91	-1.66739	0.000146756
Lilrb4	477.21	914.794	857.485	2470.07	2542.74	2126.56	-1.66614	6.16573e-20
Nphp1	6.78498	3.04593	1.30714	12.6421	8.7643	13.9577	-1.65084	0.0371629
Gzma	42.9715	41.6277	28.7571	101.137	196.101	57.8249	-1.63811	1.16989e-05
Mef2c	28.2708	13.199	10.4571	52.5132	53.6813	54.834	-1.62532	4.01607e-05
Fam19a3	10.1775	8.12248	7.84285	43.761	20.8152	15.9517	-1.62512	0.00383082
Alcam	5.65415	7.10717	7.84285	27.2291	25.1974	10.9668	-1.62427	0.00732875
Rnf39	2.26166	3.04593	7.84285	14.587	7.66876	16.9487	-1.61828	0.0332855
Syk	3.39249	11.1684	1.30714	19.4493	15.3375	14.9547	-1.59696	0.0228698
Ncf1	84.8123	28.4287	58.8214	186.714	145.706	180.454	-1.58459	5.31125e-08
Il6	6.78498	11.1684	6.53571	32.0914	21.9107	19.9396	-1.57903	0.00360598
Tgm2	291.754	228.445	269.271	898.559	723.054	718.824	-1.57046	3.95363e-27
Rgs10	85.9431	32.4899	62.7428	224.64	158.853	149.547	-1.56516	6.00886e-08
Morc1	14.7008	9.13779	16.9928	32.0914	33.9617	52.84	-1.56013	0.000418843
Socs3	809.674	628.477	671.871	2529.39	1934.72	1749.7	-1.5586	3.79995e-26
Edil3	24.8783	21.3215	30.0643	73.9075	66.8278	81.7525	-1.55682	6.96958e-07
Abcb1b	110.821	152.296	197.378	505.683	372.483	468.581	-1.55427	1.86617e-15
Sytl2	4.52332	4.06124	3.92143	15.5595	13.1464	7.97585	-1.55085	0.0375512
Hoxa7	4.52332	6.09186	10.4571	23.3392	14.242	22.9306	-1.54747	0.00937727
Aqp9	16.9625	19.2909	15.6857	52.5132	58.0635	41.8732	-1.54527	3.71363e-05
Aim1	110.821	94.4238	125.486	424.968	243.209	280.152	-1.52588	4.1023e-12
Hoxa6	5.65415	9.13779	14.3786	30.1465	21.9107	29.9094	-1.51206	0.00318556
Psd2	538.275	413.231	454.885	1498.57	1204	1293.08	-1.50749	7.46598e-30
Nkg7	1334.38	601.063	606.514	2919.34	2382.79	1907.23	-1.50387	0.00039174
Slc9a2	73.504	77.1635	65.3571	204.218	204.865	205.378	-1.50321	1.10475e-14
Zfp608	13.57	30.4593	20.9143	39.8711	70.1144	73.7766	-1.48892	0.000118941
Hebp2	4.52332	3.04593	6.53571	15.5595	13.1464	9.96981	-1.48054	0.0389782
Mtrf1	10.1775	3.04593	2.61428	9.72467	18.6241	15.9517	-1.47369	0.0391693
Tuba8	27.1399	30.4593	19.6071	65.1553	75.5921	75.7706	-1.47368	2.99608e-06
Clvs1	19.2241	10.1531	9.14999	30.1465	37.2483	39.8793	-1.47182	0.00108296
Rgl1	41.8407	41.6277	45.75	125.448	98.5983	132.599	-1.46954	7.07305e-09
Gramd3	12.4391	12.1837	10.4571	53.4857	26.2929	16.9487	-1.46234	0.00499228
Vegfa	745.217	810.217	645.728	1797.12	2161.49	2051.79	-1.44693	7.02912e-34
Leprel1	9.04664	5.07655	7.84285	15.5595	23.0063	20.9366	-1.44616	0.0125837
Rap1gap2	89.3356	76.1482	65.3571	187.686	197.197	241.269	-1.43571	3.96756e-12
Stk36	14.7008	13.199	10.4571	39.8711	32.8661	30.9064	-1.42761	0.00111826
Apobec1	113.083	107.623	108.493	267.428	314.419	300.091	-1.42094	5.12164e-17
Cst7	93.8589	54.8267	87.5785	229.502	204.865	187.432	-1.40497	1.76621e-10
Gm20652	10.1775	5.07655	1.30714	20.4218	10.9554	12.9608	-1.40154	0.0490967
Hmgn3	48.6257	41.6277	44.4428	110.861	127.082	115.65	-1.39283	1.23515e-08
Ly86	31.6632	23.3521	19.6071	89.4669	69.0188	37.8853	-1.39164	0.000235871
Sorbs1	96.1206	93.4085	86.2714	329.666	208.152	184.442	-1.38867	1.86264e-09
Tatdn3	7.91581	12.1837	16.9928	32.0914	32.8661	30.9064	-1.38338	0.0024823
Rras2	41.8407	31.4746	37.9071	78.7698	123.796	86.7374	-1.38002	2.02529e-06
Gpr18	210.334	248.751	317.636	792.56	681.424	537.373	-1.37621	6.25165e-15
Ifng	1522.1	927.993	792.128	2606.21	3397.26	2406.71	-1.37494	4.44933e-05
Zfp599	22.6166	49.7502	30.0643	97.2467	70.1144	99.6981	-1.37203	1.73766e-05
A4galt	15.8316	27.4134	19.6071	47.6509	50.3947	64.8038	-1.36419	0.00017494
Flt4	83.6814	137.067	202.607	280.07	290.317	517.433	-1.36334	0.00335143
C130026I21Rik	12.4391	9.13779	5.22857	24.3117	27.3884	17.9457	-1.36042	0.011684
Ccdc64	6.78498	6.09186	11.7643	35.0088	13.1464	13.9577	-1.35874	0.0268829
Ccdc67	7.91581	6.09186	3.92143	19.4493	8.7643	17.9457	-1.35778	0.0406956
Gpr68	45.2332	23.3521	23.5286	86.5495	75.5921	73.7766	-1.35564	2.19362e-05
Sh3bp2	5.65415	5.07655	7.84285	16.5319	16.4331	13.9577	-1.35165	0.0318137
Slc41a2	16.9625	9.13779	5.22857	40.8436	16.4331	22.9306	-1.34905	0.015234
Fam135a	5.65415	5.07655	6.53571	21.3943	14.242	7.97585	-1.34621	0.048563
Pcnxl2	16.9625	11.1684	6.53571	26.2566	32.8661	29.9094	-1.3451	0.00508029
Alpk1	32.7941	37.5665	32.6786	103.081	84.3564	72.7796	-1.33348	3.53858e-06
Mctp2	161.709	158.388	167.314	410.381	468.89	342.962	-1.3264	4.08226e-16
Ndrg1	63.3265	140.113	103.264	255.759	293.604	222.327	-1.32595	2.21489e-08
4933427D14Rik	28.2708	20.3062	31.3714	65.1553	63.5412	69.7887	-1.32459	3.31581e-05
Rnd1	23.7474	35.5358	57.5143	108.916	87.643	89.7283	-1.30924	1.89015e-05
Cd4	56.5415	53.8114	60.1285	172.127	169.808	76.7676	-1.29735	1.11739e-05
Ablim3	578.985	448.767	853.564	1485.93	1388.05	1734.75	-1.29578	1.01403e-12
Swap70	298.539	329.976	266.657	635.993	850.137	712.842	-1.29273	9.22559e-19
Tm6sf1	22.6166	37.5665	28.7571	90.4394	78.8787	48.8521	-1.288	0.000150252
4930539E08Rik	5.65415	4.06124	11.7643	12.6421	19.7197	18.9426	-1.28682	0.0395399
Hoxa5	13.57	21.3215	36.6	59.3205	65.7322	46.8581	-1.28253	0.000634146
Fyb	162.84	129.96	152.936	424.968	287.031	366.889	-1.27925	2.28992e-12
Syt12	6.78498	10.1531	2.61428	19.4493	10.9554	17.9457	-1.27713	0.0494967
Serpinb1b	10.1775	10.1531	2.61428	24.3117	10.9554	20.9366	-1.26966	0.0415282
Pde5a	510.004	334.037	318.943	1393.54	677.042	724.805	-1.26523	0.00165961
Lysmd2	251.044	177.679	232.671	482.343	569.679	529.397	-1.26081	5.05431e-16
Ociad2	9.04664	10.1531	11.7643	22.3667	15.3375	35.8913	-1.25801	0.0176029
Ccr7	62.1957	48.7349	26.1428	124.476	117.222	88.7313	-1.25724	1.89616e-05
Atoh8	7.91581	9.13779	10.4571	15.5595	21.9107	27.9155	-1.25299	0.0203892
Plekhh2	10.1775	19.2909	20.9143	33.0639	44.917	41.8732	-1.25282	0.00240748
Myl4	6.78498	12.1837	3.92143	27.2291	14.242	13.9577	-1.25056	0.0436416
Tdrd9	263.483	195.955	211.757	509.572	510.52	572.267	-1.24725	4.6996e-17
Chchd6	16.9625	19.2909	35.2928	53.4857	58.0635	55.831	-1.24549	0.000487481
Acsbg1	199.026	168.541	215.678	531.939	428.355	417.735	-1.24534	6.36369e-15
Ptprm	262.353	337.083	287.571	596.122	767.972	741.754	-1.24472	3.31531e-17
Lag3	13.57	5.07655	7.84285	24.3117	16.4331	20.9366	-1.22921	0.029597
Slamf7	534.883	309.669	295.414	1117.36	748.252	796.588	-1.22334	3.51423e-09
BC067074	124.391	74.1176	132.021	235.337	213.63	318.037	-1.22307	8.94566e-08
Gpr146	89.3356	85.286	66.6642	227.557	192.815	143.565	-1.2198	7.39648e-08
Dock6	21.4858	13.199	11.7643	30.1465	26.2929	51.843	-1.21944	0.00711394
Hid1	31.6632	17.2603	14.3786	62.2379	37.2483	46.8581	-1.20665	0.00237177
4930506M07Rik	71.2423	89.3472	92.8071	193.521	196.101	194.411	-1.20628	5.46688e-10
Gemin6	10.1775	9.13779	3.92143	16.5319	19.7197	17.9457	-1.19874	0.0407127
Cdc14a	270.268	201.031	209.143	437.61	578.444	544.352	-1.19662	2.12057e-13
Prc1	204.68	224.383	205.221	401.629	526.953	519.427	-1.18852	1.1453e-14
Fam109b	35.0557	35.5358	31.3714	93.3568	62.4456	74.7736	-1.17644	7.94179e-05
Plod2	62.1957	90.3626	112.414	177.961	209.248	209.366	-1.17643	7.60848e-08
Fasl	573.331	254.843	345.086	1250.59	812.889	586.225	-1.17552	0.0127333
Tspan31	194.503	179.71	206.528	413.298	452.457	441.663	-1.17337	1.26812e-16
Rin2	9.04664	6.09186	7.84285	12.6421	19.7197	18.9426	-1.1619	0.0497555
Chsy1	248.783	207.123	147.707	461.922	473.272	418.732	-1.16027	2.52073e-11
Esam	11.3083	7.10717	14.3786	27.2291	19.7197	24.9245	-1.15439	0.0229359
Zfp839	44.1024	28.4287	36.6	85.5771	89.834	66.7977	-1.15425	8.81692e-05
Klri1	30.5324	21.3215	18.3	71.9625	44.917	38.8823	-1.14867	0.0025599
Slc8a1	6.78498	15.2296	31.3714	11.6696	62.4456	42.8702	-1.14319	0.0471077
Dzank1	38.4482	16.245	15.6857	48.6233	44.917	60.8159	-1.13113	0.00396136
Nod1	31.6632	10.1531	18.3	57.3755	25.1974	47.8551	-1.12806	0.0131204
Klrb1a	24.8783	10.1531	11.7643	43.761	41.6304	16.9487	-1.12776	0.0236844
Prss12	39.5791	37.5665	39.2143	81.6872	61.3501	109.668	-1.12246	0.000173513
Dll1	68.9806	98.485	52.2857	225.612	143.515	111.662	-1.12147	9.20263e-05
Atp8a2	62.1957	26.3981	20.9143	113.779	56.9679	67.7947	-1.12111	0.00389989
4930550C14Rik	32.7941	27.4134	37.9071	62.2379	82.1653	67.7947	-1.11956	0.000221737
Hsbp1l1	31.6632	58.888	45.75	94.3293	130.369	72.7796	-1.11845	0.000236915
Hectd2	67.8498	72.087	81.0428	147.815	157.757	172.478	-1.11671	7.64931e-08
AA467197	15.8316	21.3215	18.3	41.8161	28.484	49.8491	-1.1151	0.00566516
Irf4	98.3822	68.0257	49.6714	216.86	145.706	106.677	-1.11493	0.000120312
Gucy1a3	24.8783	9.13779	32.6786	34.0363	54.7769	52.84	-1.10756	0.00930741
Large	111.952	108.638	138.557	306.327	283.744	181.451	-1.10702	2.8342e-07
Lrp12	21.4858	27.4134	10.4571	43.761	49.2992	36.8883	-1.10645	0.00580697
Pkp4	76.8964	49.7502	47.0571	143.925	111.745	116.647	-1.09891	1.5259e-05
Mzt2	16.9625	15.2296	14.3786	43.761	36.1527	19.9396	-1.09848	0.0147685
Cdkl2	10.1775	7.10717	15.6857	26.2566	26.2929	16.9487	-1.09717	0.0353786
Nupr1	71.2423	90.3626	57.5143	179.906	145.706	145.559	-1.09541	1.30906e-06
Pdzk1	249.913	258.904	175.157	501.793	585.017	379.85	-1.09535	4.9469e-09
Gpc1	254.437	161.434	232.671	435.665	440.406	501.482	-1.09127	1.61466e-10
Gm9933	18.0933	15.2296	5.22857	29.174	25.1974	28.9125	-1.08993	0.0255922
M1ap	29.4016	24.3674	45.75	52.5132	81.0697	75.7706	-1.08667	0.00097694
Sdc1	1100.3	944.238	1160.74	1573.45	2787.05	2441.61	-1.08583	1.86103e-10
Arl10	21.4858	15.2296	14.3786	32.0914	38.3438	37.8853	-1.08029	0.00790252
Bcl6	400.314	235.552	258.814	642.8	629.934	612.147	-1.07518	7.38849e-10
Tnfrsf11a	85.9431	101.531	90.1928	174.072	207.057	205.378	-1.07514	2.42395e-08
Qpct	83.6814	39.5971	52.2857	122.531	110.649	135.589	-1.07447	7.35714e-05
Pcdhga9	47.4949	45.6889	65.3571	114.751	107.363	108.671	-1.07179	1.32818e-05
Cd3g	41.8407	38.5818	45.75	68.0727	129.273	67.7947	-1.07058	0.000670673
Klrc1	686.414	714.778	635.271	1408.13	1643.31	1227.28	-1.06963	2.77677e-17
Dyrk3	20.3549	33.5052	43.1357	64.1828	84.3564	53.837	-1.06692	0.00154496
Fam184b	203.549	246.72	253.586	563.058	416.304	486.527	-1.06033	1.74066e-11
Gpr98	55.4107	46.7042	50.9785	109.889	105.172	103.686	-1.06022	1.1562e-05
Ddx43	30.5324	17.2603	10.4571	42.7885	33.9617	44.8642	-1.05293	0.0119413
Gnpda2	707.9	754.375	743.764	1352.7	1679.46	1541.33	-1.05131	1.51961e-20
Ctsf	55.4107	56.8573	75.8142	137.118	119.414	129.608	-1.04702	5.28605e-06
Pltp	204.68	229.46	218.293	478.454	555.437	312.055	-1.04334	6.05954e-08
Cpq	20.3549	19.2909	35.2928	45.7059	53.6813	52.84	-1.03953	0.00360607
Spry2	537.144	513.747	717.621	850.908	1367.23	1412.72	-1.03921	1.10367e-08
Tanc1	67.8498	83.2554	112.414	188.659	143.515	205.378	-1.03727	5.88236e-06
Mex3d	23.7474	15.2296	19.6071	26.2566	58.0635	35.8913	-1.03604	0.0144578
Eya4	12.4391	13.199	9.14999	21.3943	21.9107	27.9155	-1.02378	0.0369556
Pecam1	591.424	622.385	660.107	1039.57	1344.22	1418.7	-1.02117	1.28261e-14
Scn5a	40.7099	44.6736	44.4428	80.7147	88.7385	92.7193	-1.01359	0.000111876
Mfsd7b	261.222	264.996	288.878	518.325	654.036	466.587	-1.00792	4.82012e-11
Wdr86	52.0182	38.5818	52.2857	98.2191	89.834	96.7072	-1.00302	9.80105e-05
Pdcd1	45.2332	36.5511	49.6714	61.2654	111.745	89.7283	-1.00232	0.000745822
Egr1	956.682	428.461	457.5	1370.21	1303.69	1008.95	-0.998963	0.0124
Elovl6	110.821	125.898	120.257	239.227	285.935	184.442	-0.988925	6.61966e-07
Trmt5	12.4391	17.2603	10.4571	15.5595	31.7706	32.9004	-0.982266	0.0464481
Mpdz	19.2241	18.2756	24.8357	38.8987	35.0572	47.8551	-0.977413	0.0100962
Plaur	15.8316	24.3674	30.0643	48.6233	59.159	29.9094	-0.974794	0.013511
Tyrobp	183.194	142.143	190.843	305.355	452.457	255.227	-0.974316	3.91925e-06
A230020J21Rik	31.6632	23.3521	32.6786	56.4031	72.3054	41.8732	-0.964555	0.00488943
Tssk6	13.57	15.2296	14.3786	31.1189	20.8152	31.9034	-0.959615	0.033844
Sgk3	19.2241	13.199	10.4571	32.0914	30.675	20.9366	-0.957513	0.0390214
Cenpt	11.3083	16.245	18.3	35.9813	32.8661	19.9396	-0.957338	0.0358742
Hsdl2	240.867	234.537	223.521	463.867	450.266	442.66	-0.95597	6.98125e-13
H2-Ab1	126.653	164.48	139.864	283.96	255.26	293.112	-0.947055	2.33393e-08
H2-Eb1	63.3265	45.6889	33.9857	91.4119	73.401	110.665	-0.941284	0.00114565
Tmem205	16.9625	31.4746	10.4571	39.8711	37.2483	37.8853	-0.94081	0.0261731
Tubb2b	23.7474	11.1684	32.6786	41.8161	39.4393	45.8611	-0.934737	0.0204393
Mmp23	56.5415	61.9339	54.9	117.668	110.649	103.686	-0.93432	6.32573e-05
Zfp59	21.4858	11.1684	15.6857	35.0088	28.484	27.9155	-0.926759	0.0345805
Ccr6	30.5324	16.245	11.7643	48.6233	33.9617	28.9125	-0.923737	0.0341332
Trpc6	57.6723	63.9645	65.3571	112.806	94.2162	145.559	-0.917685	0.000194968
Glb1l	46.364	53.8114	35.2928	92.3843	71.2099	93.7162	-0.91746	0.00091133
Prrg1	27.1399	11.1684	22.2214	48.6233	24.1018	39.8793	-0.91114	0.037386
Lnx1	32.7941	24.3674	19.6071	29.174	54.7769	60.8159	-0.907498	0.0189729
Ccdc157	18.0933	22.3368	28.7571	45.7059	47.1081	35.8913	-0.902959	0.0144983
Uprt	22.6166	15.2296	20.9143	30.1465	35.0572	43.8672	-0.899541	0.0244864
Nav1	37.3174	19.2909	48.3643	50.5683	69.0188	73.7766	-0.897537	0.00973919
Hells	62.1957	57.8727	49.6714	87.522	134.751	94.7132	-0.894182	0.000591805
Il1rl2	76.8964	40.6124	64.05	115.724	111.745	107.674	-0.891934	0.000548843
Pqlc1	145.877	381.756	312.407	538.746	636.507	383.838	-0.891772	0.0443905
BC022687	37.3174	18.2756	11.7643	40.8436	47.1081	37.8853	-0.891486	0.0322382
Eps8l3	1085.6	906.672	862.714	1640.55	1848.17	1805.53	-0.890212	1.13532e-14
Suox	22.6166	17.2603	15.6857	42.7885	33.9617	25.9215	-0.883579	0.0333098
Gsap	141.354	102.546	88.8857	221.722	215.821	171.481	-0.86849	3.53877e-05
Fbxw9	18.0933	25.3827	16.9928	32.0914	37.2483	41.8732	-0.867601	0.0266816
Dapk2	85.9431	36.5511	35.2928	126.421	76.6876	83.7464	-0.862065	0.0111062
Cd101	32.7941	12.1837	23.5286	56.4031	39.4393	26.9185	-0.851608	0.049311
Sphk1	11.3083	22.3368	23.5286	42.7885	36.1527	23.9276	-0.850587	0.0495739
Soat1	249.913	288.348	237.9	491.096	547.769	354.925	-0.841504	1.05803e-06
Tifa	227.297	226.414	241.821	396.766	426.164	417.735	-0.835983	7.79389e-10
Guf1	415.015	482.272	500.635	759.496	943.257	785.621	-0.831845	2.73472e-10
Rccd1	61.0648	102.546	83.6571	141.98	121.605	176.466	-0.829497	0.000556131
Il21r	64.4573	35.5358	30.0643	91.4119	73.401	66.7977	-0.829219	0.00876046
2310022B05Rik	82.5506	128.944	101.957	156.567	209.248	192.417	-0.827079	0.000106894
Tfdp1	71.2423	48.7349	69.2785	135.173	105.172	91.7223	-0.818723	0.00139001
Gfer	16.9625	19.2909	20.9143	28.2015	43.8215	28.9125	-0.818402	0.0463522
Chst12	506.612	391.91	477.107	775.056	770.163	869.368	-0.813837	4.10634e-10
Auts2	22.6166	17.2603	20.9143	43.761	29.5795	32.9004	-0.812775	0.0406157
Pik3cb	360.735	296.47	315.021	553.333	552.151	601.18	-0.812586	5.35427e-10
Tnfsf4	18.0933	24.3674	24.8357	35.0088	50.3947	32.9004	-0.811324	0.0344703
Abcc5	21.4858	16.245	37.9071	47.6509	32.8661	49.8491	-0.808523	0.0399742
Ctla4	1629.53	1203.14	1488.83	2604.27	2788.14	2166.44	-0.807134	1.22879e-09
Dennd3	127.784	151.281	108.493	248.951	236.636	195.408	-0.806752	1.9747e-05
Klhl8	29.4016	27.4134	20.9143	43.761	40.5349	51.843	-0.802541	0.0218569
Gtf2h4	71.2423	54.8267	53.5928	88.4945	105.172	119.638	-0.800557	0.00129828
Bag3	173.017	149.251	109.8	275.208	308.941	165.499	-0.79029	0.000761192
Ece1	1303.85	1544.29	1511.06	2402.96	2649.01	2477.5	-0.788304	1.58491e-14
Hk3	28.2708	17.2603	22.2214	36.9537	42.7259	36.8883	-0.786198	0.0373438
Dtx1	1022.27	933.07	820.885	2183.19	1270.82	1319.01	-0.781699	1.15868e-05
Lrrc42	20.3549	26.3981	16.9928	32.0914	40.5349	37.8853	-0.780299	0.0434723
Ptov1	41.8407	38.5818	43.1357	70.9901	67.9233	72.7796	-0.780265	0.00486574
Ust	200.157	196.97	147.707	321.886	326.47	289.125	-0.777418	2.31996e-06
Pkp2	23.7474	24.3674	19.6071	38.8987	43.8215	33.8974	-0.776332	0.0366286
Gsn	280.446	304.593	283.65	494.985	535.718	458.611	-0.775908	4.7493e-09
Ptprj	101.775	86.3013	100.65	181.851	158.853	151.541	-0.773611	9.28643e-05
Metap1d	40.7099	36.5511	48.3643	64.1828	74.4965	74.7736	-0.771379	0.00615284
Fam110b	38.4482	34.5205	43.1357	63.2103	58.0635	75.7706	-0.77031	0.00871098
Napsa	132.307	97.4697	130.714	241.172	204.865	166.496	-0.769806	0.000176545
Gtf2i	274.792	257.889	265.35	480.398	427.259	450.636	-0.768346	7.18854e-09
Irf8	1095.77	964.544	914.999	1731.96	1646.59	1684.9	-0.766584	1.93975e-13
Clstn1	229.558	184.786	179.078	384.124	273.884	348.943	-0.763496	1.1876e-05
Usp11	61.0648	37.5665	24.8357	67.1002	60.2545	82.7494	-0.760431	0.020886
Selm	39.5791	38.5818	37.9071	61.2654	69.0188	64.8038	-0.747535	0.00907697
Tbc1d30	106.298	77.1635	74.5071	156.567	135.847	140.574	-0.746456	0.000560326
Pdcd1lg2	107.429	77.1635	104.571	185.741	155.566	141.571	-0.745912	0.00046423
Ldhb	178.671	161.434	128.1	285.905	289.222	211.36	-0.743801	8.25664e-05
Eogt	50.8874	36.5511	32.6786	77.7973	60.2545	62.8098	-0.740068	0.0135556
Tacstd2	99.513	78.1788	64.05	149.76	130.369	124.623	-0.739604	0.00104262
Ms4a6b	549.583	314.746	315.021	798.395	603.641	566.285	-0.738851	0.000260689
Stat3	3524.8	5358.8	4744.93	8053	7428.84	7190.23	-0.734198	5.30163e-08
Deb1	33.9249	31.4746	23.5286	42.7885	46.0126	59.8189	-0.733994	0.0303317
Ermp1	601.602	528.976	530.7	819.789	1095.54	845.44	-0.731797	9.09193e-08
Itk	1294.8	1201.11	1141.14	2473.95	1780.25	1775.62	-0.729389	8.38815e-08
Rps6kc1	31.6632	34.5205	39.2143	51.5407	53.6813	66.7977	-0.711109	0.0214182
Il6st	42.9715	60.9186	69.2785	80.7147	104.076	97.7042	-0.708667	0.00674843
As3mt	40.7099	38.5818	54.9	69.0451	66.8278	81.7525	-0.707805	0.0121018
Lgals3	251.044	188.848	249.664	333.556	495.183	293.112	-0.703058	0.000431604
Elmod3	48.6257	31.4746	35.2928	71.9625	51.4902	63.8068	-0.70242	0.023198
Rell1	635.526	664.013	845.721	981.219	1206.19	1299.07	-0.702201	8.25329e-07
Cul9	62.1957	54.8267	90.1928	96.2742	105.172	132.599	-0.699772	0.00605933
Ndufaf2	31.6632	27.4134	27.45	48.6233	59.159	32.9004	-0.69779	0.0489894
Mrpl34	32.7941	27.4134	33.9857	51.5407	53.6813	46.8581	-0.69583	0.0304298
Tsga10	52.0182	31.4746	37.9071	79.7423	63.5412	52.84	-0.695477	0.0258071
Cnr2	80.2889	56.8573	66.6642	94.3293	112.84	121.632	-0.691852	0.00394014
Slc13a4	48.6257	53.8114	82.35	87.522	84.3564	123.626	-0.688115	0.0123858
Dnajc15	360.735	283.271	288.878	504.71	522.571	469.578	-0.681698	1.1842e-06
Lat2	61.0648	34.5205	36.6	85.5771	50.3947	74.7736	-0.675874	0.0352064
Sepn1	167.363	112.699	143.786	303.41	201.579	170.484	-0.675777	0.00326658
Batf	496.434	615.278	552.921	889.807	1032	735.772	-0.673539	2.68505e-06
Pias3	58.8032	40.6124	32.6786	62.2379	72.3054	76.7676	-0.671809	0.0234982
Dclre1b	74.6348	64.9798	50.9785	137.118	71.2099	94.7132	-0.6679	0.0180504
2900026A02Rik	131.176	118.791	66.6642	186.714	161.044	157.523	-0.666326	0.0042045
Cdc42ep2	55.4107	52.7961	44.4428	109.889	78.8787	53.837	-0.666027	0.0275151
Hopx	295.147	145.189	180.386	409.408	334.139	238.279	-0.66235	0.00632962
Zfyve19	48.6257	40.6124	49.6714	80.7147	74.4965	63.8068	-0.661739	0.0159455
2005-09-01	32.7941	57.8727	45.75	78.7698	77.7831	59.8189	-0.659971	0.0258532
Sorcs2	212.596	78.1788	125.486	187.686	180.764	288.128	-0.659968	0.0215
Ikbkb	987.215	864.029	849.642	1483.01	1531.56	1253.21	-0.659561	1.86141e-08
Nup35	41.8407	35.5358	41.8285	67.1002	48.2036	71.7827	-0.657027	0.0295099
Doc2a	44.1024	49.7502	54.9	89.4669	76.6876	67.7947	-0.656974	0.0144495
Zfp607	44.1024	34.5205	41.8285	69.0451	59.159	60.8159	-0.65556	0.02427
Tmem194b	377.697	337.083	416.978	663.222	558.724	556.316	-0.655243	1.53618e-06
Lrrk2	304.193	327.945	457.5	538.746	509.425	662.993	-0.655094	9.41988e-05
Runx2	292.885	219.307	206.528	391.904	410.826	322.025	-0.644317	0.000145728
Ccr5	194.503	130.975	120.257	209.08	245.4	243.263	-0.643931	0.00120436
Usp1	248.783	269.057	295.414	407.464	438.215	419.729	-0.639413	2.62599e-06
Zc3h13	297.408	306.624	337.243	440.527	537.909	485.53	-0.637902	2.9453e-06
Rprm	83.6814	76.1482	71.8928	104.054	113.936	142.568	-0.6365	0.00503514
Cyth3	149.27	134.021	142.478	218.805	204.865	237.282	-0.636353	0.000178315
Lgr4	32.7941	36.5511	33.9857	40.8436	56.9679	62.8098	-0.633125	0.0492456
Zfp810	92.7281	159.404	154.243	162.402	239.923	228.309	-0.632983	0.00527486
Gimap7	400.314	233.521	320.25	530.967	451.361	494.503	-0.632909	0.000322838
Cabin1	360.735	297.486	337.243	494.013	541.195	506.466	-0.632234	1.55303e-06
Rab3ip	53.149	34.5205	70.5857	81.6872	85.4519	75.7706	-0.631878	0.0278061
Ostf1	1855.69	2368.72	2214.3	3143.98	3514.48	3314.96	-0.631037	1.03645e-08
Acy1	40.7099	39.5971	43.1357	83.6321	55.8724	50.846	-0.629203	0.040771
Mmp25	199.026	154.327	207.836	286.878	274.98	302.085	-0.627819	0.000131767
BC052040	85.9431	68.0257	70.5857	128.366	96.4073	120.635	-0.62367	0.00693243
Tanc2	52.0182	39.5971	33.9857	74.8799	58.0635	60.8159	-0.623068	0.0361746
Dlc1	41.8407	45.6889	39.2143	71.9625	63.5412	59.8189	-0.620736	0.0286849
Thy1	373.174	312.715	409.135	557.223	564.202	556.316	-0.619189	3.5109e-06
Espn	219.381	240.628	215.678	389.959	334.139	310.061	-0.61274	5.80573e-05
Csrnp2	40.7099	42.643	44.4428	82.6597	54.7769	56.8279	-0.608121	0.0412464
Relt	45.2332	39.5971	32.6786	65.1553	62.4456	51.843	-0.60547	0.0435198
Srfbp1	35.0557	46.7042	39.2143	49.5958	74.4965	60.8159	-0.604969	0.0468107
Sgsm2	47.4949	38.5818	33.9857	73.9075	58.0635	50.846	-0.604459	0.0479325
Snx21	67.8498	65.9951	47.0571	85.5771	94.2162	96.7072	-0.603738	0.0156418
Plscr1	1632.92	1720.95	1533.28	2247.37	2726.79	2454.57	-0.603211	1.03008e-08
Fam124b	98.3822	102.546	86.2714	191.576	129.273	115.65	-0.602561	0.00975305
Rnf25	52.0182	63.9645	65.3571	84.6046	86.5474	103.686	-0.601424	0.0151739
Abi3bp	634.396	558.42	539.85	852.853	812.889	957.102	-0.59792	6.8876e-07
Plekha1	532.621	511.716	405.214	698.231	738.392	760.697	-0.597306	4.39452e-06
Igfbp4	55.4107	35.5358	64.05	68.0727	76.6876	87.7344	-0.596342	0.0369516
Dck	46.364	40.6124	32.6786	66.1277	64.6367	50.846	-0.595909	0.0475978
Cd48	659.274	486.333	482.335	883	815.08	758.703	-0.5934	2.70869e-05
Kif3a	64.4573	58.888	74.5071	96.2742	108.458	92.7193	-0.592745	0.012225
Slc35d1	117.606	136.051	143.786	221.722	200.483	175.469	-0.590407	0.00130164
Rfxank	158.316	169.557	150.321	215.888	272.789	233.294	-0.590383	0.000508263
Ict1	49.7565	68.0257	74.5071	96.2742	101.885	90.7253	-0.589673	0.0165489
2410127L17Rik	144.746	154.327	147.707	224.64	225.681	222.327	-0.589316	0.000306385
Ift57	72.3731	76.1482	81.0428	119.613	124.891	100.695	-0.58931	0.00784563
Smim3	241.998	189.863	232.671	329.666	325.375	340.968	-0.587181	0.000103273
