# Supplementary material for: c-Maf restrains T-bet-driven programming of CCR6-negative group 3 innate lymphoid cells
Source: eLife. 2020 Feb 10;9:e52549. doi: 10.7554/eLife.52549 (PMC7025824; doi:10.7554/eLife.52549)
Supplement: Supplementary file 2. — NKp46+ CCR6- ILC3s and NKp46- CCR6+ ILC3s were sorted from siLP of RorcCreMaffl/fl and control mice and subjected to RNA sequencing. 294 genes were found to be differentially expressed (FC >1.5, p-value<0.05) in both subsets. [file elife-52549-supp2.xlsx]

## Sheet: Sheet1
Symbol	WTILC3NCRp.norm	WTILC3NCRpII.norm	WTILC3NCRpIII.norm	MafKOILC3NCRp.norm	MafKOILC3NCRpII.norm	MafKOILC3NCRpIII.norm	WTILC3CCR6p.norm	WTILC3CCR6pII.norm	WTILC3CCR6pIII.norm	MafKOILC3CCR6p.norm	MafKOILC3CCR6pII.norm	MafKOILC3CCR6pIII.norm	gr_WTILC3NCRp_vs_MafKOILC3NCRp_log2FoldChange	gr_WTILC3NCRp_vs_MafKOILC3NCRp_pvalue	GC_gr_WTILC3CCR6p_vs_MafKOILC3CCR6p_log2FoldChange	GC_gr_WTILC3CCR6p_vs_MafKOILC3CCR6p_pvalue
Gda	439.893	401.047	543.771	0	4.38215	1.99396	3.27923	4.46357	17.0724	0.947688	2.05365	0	7.81882	2.0803e-37	3.11623	0.00415673
Maf	779.142	704.625	644.421	0	5.47769	8.97283	292.671	303.523	318.685	0.947688	0	0	7.2205	2.0941e-69	9.83706	1.11048e-16
Sh3pxd2b	36.1866	15.2296	22.2214	0	0	0	20.4952	8.92714	12.3301	3.79075	3.08048	3.30928	7.02881	6.86105e-08	2.04099	0.00287414
1700113H08Rik	21.4858	39.5971	31.3714	0	0	0.996981	27.8734	28.5668	26.5571	0	0	0.827319	6.40023	4.68696e-07	6.37553	3.07768e-07
Stab2	105.167	310.685	237.9	2.9174	0	4.98491	625.512	705.244	603.226	1.89538	0	0.827319	6.34631	2.08717e-13	9.44378	7.20078e-27
Gdpd1	41.8407	49.7502	20.9143	0.972467	1.09554	0	52.4676	87.486	58.805	4.73844	3.08048	8.27319	5.79389	2.16567e-07	3.59238	7.95245e-13
St6gal1	104.036	124.883	129.407	5.8348	0	1.99396	342.679	290.132	227.632	35.0645	40.0463	46.3299	5.46284	9.52455e-22	2.82172	7.72243e-34
Zbtb7c	6.78498	24.3674	16.9928	0	1.09554	0	13.1169	21.4251	24.6602	0.947688	0	0	5.46033	6.17208e-05	5.88416	7.1966e-06
Blk	31.6632	116.761	77.1214	1.94493	3.28661	3.98793	401.705	590.084	615.556	83.3966	120.139	143.126	4.62119	2.97833e-13	2.21217	6.43242e-07
Procr	3.39249	2.03062	7.84285	0	0	0	5.73865	33.9231	16.124	3.79075	8.21462	4.96392	4.54125	0.00846855	1.72252	0.0280403
H2-Q2	47.4949	50.7655	49.6714	0	3.28661	3.98793	13.9367	3.57086	4.74234	1.89538	0	4.1366	4.3699	2.21955e-11	1.82552	0.0189653
Vdr	230.689	667.058	580.371	14.587	32.8661	38.8823	65.5845	135.693	105.28	2.84306	7.18779	4.96392	4.0993	6.93152e-12	4.36176	2.34264e-12
Ccdc162	48.6257	46.7042	77.1214	2.9174	2.19107	4.98491	3.27923	8.03442	5.69081	0.947688	2.05365	0	4.07689	1.66063e-12	2.59114	0.00778794
Ifi204	42.9715	46.7042	40.5214	1.94493	2.19107	3.98793	15.5763	58.0264	36.0418	7.58151	5.13414	2.48196	4.00027	2.18206e-10	2.86779	3.9402e-07
Chn1	9.04664	7.10717	14.3786	0	0	1.99396	0.819806	10.7126	8.53621	0.947688	1.02683	1.65464	3.90092	0.00249773	2.43768	0.0266036
Igf2	2.26166	2.03062	3.92143	0	0	0	1.63961	7.14171	6.63928	0	0	0	3.85706	0.0467531	4.90269	0.00281954
Plxnd1	73.504	94.4238	67.9714	9.72467	2.19107	4.98491	208.231	149.083	148.91	61.5997	74.9584	52.9484	3.78005	4.47737e-16	1.4248	5.30118e-09
Fmn1	32.7941	32.4899	45.75	0.972467	2.19107	4.98491	20.4952	33.0304	44.578	1.89538	5.13414	4.96392	3.76259	1.11993e-08	3.02277	8.41552e-08
Cxcl1	514.528	755.39	390.835	48.6233	37.2483	47.8551	320.544	742.738	311.098	131.729	61.6096	85.2139	3.63333	2.16618e-51	2.30211	9.85121e-08
Fam195a	125.522	193.924	205.221	11.6696	17.5286	17.9457	101.656	101.769	103.383	16.1107	15.4024	10.7552	3.4805	3.68165e-28	2.8727	1.54482e-20
Plxdc1	4.52332	4.06124	2.61428	0.972467	0	0	27.8734	25.8887	23.7117	11.3723	8.21462	9.10051	3.35864	0.0477157	1.4335	0.0048328
Lpcat2	16.9625	24.3674	13.0714	4.86233	0	0.996981	27.0536	51.7774	64.4958	6.63382	6.16096	6.61856	3.18039	0.000191827	2.87857	4.29971e-08
Vill	32.7941	89.3472	81.0428	1.94493	13.1464	8.97283	63.9449	71.4171	63.5474	29.3783	31.8316	31.4381	3.09807	1.60157e-09	1.10227	0.00275287
S1pr3	320.025	344.19	236.593	29.174	51.4902	26.9185	275.455	332.09	300.664	133.624	147.863	98.451	3.07957	2.93355e-35	1.2615	1.45542e-09
Ccr2	497.565	657.921	956.828	65.1553	112.84	78.7615	36.8913	95.5204	127.095	4.73844	5.13414	4.1366	3.04366	2.70403e-39	4.21545	8.35811e-13
Rab13	32.7941	32.4899	24.8357	3.88987	4.38215	2.99094	58.2063	35.7086	41.7326	13.2676	5.13414	5.79124	3.00945	7.77675e-07	2.49282	2.72616e-08
Fam167a	48.6257	176.664	147.707	9.72467	24.1018	12.9608	655.845	962.346	933.293	185.747	321.397	287.08	3.00728	5.52862e-12	1.68372	0.000356269
Vamp5	23.7474	9.13779	7.84285	0.972467	3.28661	0.996981	16.3961	13.3907	13.2786	2.84306	1.02683	6.61856	2.98681	0.00161793	1.99402	0.00601961
Pcdh7	0	11.1684	10.4571	0	0	2.99094	2.45942	6.249	1.89694	0	1.02683	0	2.83567	0.0477504	3.40724	0.0434716
Gja1	16.9625	56.8573	37.9071	2.9174	8.7643	4.98491	22.1348	73.2025	41.7326	4.73844	13.3488	9.92783	2.76692	3.70533e-06	2.29357	3.69957e-05
Podnl1	1772.01	1119.89	1262.7	246.034	171.999	198.399	1773.24	1078.4	1108.76	345.906	305.995	402.077	2.75062	3.49765e-54	1.90905	8.1895e-20
Cpne7	130.045	59.9033	64.05	22.3667	5.47769	10.9668	2.45942	0.892714	1.89694	0	0	0	2.69506	1.10479e-09	3.36536	0.0153807
Rnase4	603.863	640.66	589.521	101.137	85.4519	117.644	127.07	213.359	189.694	51.1752	58.5292	72.8041	2.58915	9.05685e-63	1.52994	2.87491e-13
Col16a1	7.91581	6.09186	3.92143	0.972467	1.09554	0.996981	35.2517	28.5668	32.2479	0	4.10731	4.96392	2.55801	0.0375247	3.38582	2.67358e-07
Sntb1	213.727	145.189	160.778	30.1465	20.8152	36.8883	40.9903	25.8887	26.5571	1.89538	2.05365	2.48196	2.55715	4.72711e-21	3.8566	3.28681e-10
Entpd1	97.2514	44.6736	43.1357	8.7522	13.1464	9.96981	27.8734	32.1377	23.7117	17.0584	16.4292	10.7552	2.5459	1.67589e-08	0.931256	0.0264618
Cxcl2	1634.05	3191.12	2790.75	281.043	670.469	378.853	620.594	1226.59	865.003	239.765	300.86	212.621	2.51763	5.38765e-08	1.84873	3.19117e-06
Cd14	6.78498	12.1837	7.84285	1.94493	0	2.99094	22.9546	28.5668	18.9694	8.52919	7.18779	5.79124	2.41942	0.0173948	1.72009	0.00144584
Ednrb	53.149	67.0104	37.9071	8.7522	14.242	7.97585	112.313	158.01	154.6	11.3723	32.8585	23.1649	2.36989	5.06059e-08	2.66224	9.03945e-16
Dppa2	238.605	334.037	329.4	44.7335	58.0635	94.7132	22.9546	59.8118	34.1449	0.947688	8.21462	12.4098	2.19059	1.46047e-19	2.41996	5.67178e-05
Rnf144a	205.811	208.138	245.743	47.6509	32.8661	63.8068	241.023	278.527	263.674	176.27	155.051	166.291	2.18423	7.41622e-21	0.653076	9.32842e-05
Slc7a8	3.39249	19.2909	18.3	2.9174	2.19107	3.98793	6.55845	11.6053	11.3816	0.947688	0	1.65464	2.16449	0.0103384	3.42478	0.00131745
Src	101.775	155.342	125.486	23.3392	25.1974	36.8883	50.0082	81.237	71.1351	19.9015	13.3488	33.0928	2.16394	6.25599e-14	1.58531	1.43801e-06
Slc16a7	7.91581	6.09186	9.14999	0.972467	3.28661	0.996981	7.37826	20.5324	26.5571	3.79075	5.13414	11.5825	2.16022	0.0349916	1.38216	0.0365608
Hmga2	12.4391	4.06124	5.22857	1.94493	2.19107	0.996981	4.91884	3.57086	2.8454	0	0	0	2.08757	0.0493999	4.47161	0.0022231
Ang	40.7099	49.7502	54.9	7.77973	13.1464	13.9577	16.3961	31.245	28.454	4.73844	2.05365	11.5825	2.06245	7.22857e-07	1.99387	6.79235e-05
Arl5c	802.889	2866.22	2912.31	587.37	469.985	562.297	279.554	770.412	760.672	267.248	202.285	205.175	2.02263	0.000275756	1.42397	0.00562475
Stau2	46.364	51.7808	32.6786	7.77973	9.85983	14.9547	29.513	42.8503	51.2173	15.163	14.3756	27.3015	2.01118	5.44009e-06	1.10058	0.00391148
Clu	12.4391	69.0411	31.3714	11.6696	12.0509	4.98491	106.575	170.508	108.125	73.9197	63.6633	67.0129	1.98596	0.00079171	0.912542	0.0192342
Il17a	13.57	22.3368	3.92143	2.9174	3.28661	3.98793	89.3589	272.278	218.148	63.4951	123.219	62.049	1.98562	0.0152087	1.22191	0.0333224
Zeb2	26.0091	37.5665	15.6857	4.86233	6.57322	8.97283	142.646	225.857	200.127	16.1107	14.3756	39.7113	1.97039	0.000541843	2.99663	1.92278e-16
Ppp1r14c	265.745	172.603	207.836	81.6872	46.0126	39.8793	42.6299	36.6013	56.9081	0.947688	1.02683	0.827319	1.94186	1.71424e-13	5.6106	1.83094e-10
Gprc5a	46.364	49.7502	53.5928	9.72467	19.7197	9.96981	38.5309	53.5628	55.9596	10.4246	19.5097	16.5464	1.93778	1.96656e-06	1.67107	2.64807e-06
Ffar2	523.574	467.042	563.378	152.677	128.178	124.623	255.78	186.577	190.642	32.2214	24.6439	45.5026	1.93508	3.90988e-36	2.61149	5.57089e-33
Srsf12	16.9625	9.13779	13.0714	1.94493	5.47769	2.99094	2.45942	2.67814	2.8454	0	1.02683	0	1.92488	0.01242	2.99423	0.0333719
Fzd4	136.83	147.22	177.771	33.0639	46.0126	45.8611	81.1608	118.731	134.683	43.5937	57.5023	42.1933	1.88668	1.03957e-14	1.22592	6.92923e-07
Ppm1l	90.4664	160.419	125.486	24.3117	30.675	48.8521	86.0797	146.405	140.373	53.0705	68.7974	97.6237	1.85936	1.43685e-09	0.75827	0.0120167
Tmem154	956.682	966.575	742.457	262.566	195.006	285.137	496.803	665.072	505.534	272.934	291.619	389.667	1.84272	6.63927e-31	0.803018	9.89448e-06
Adrb2	407.099	440.644	386.914	134.2	86.5474	125.62	232.005	210.68	162.188	127.938	88.3072	86.0412	1.83021	1.582e-25	1.0039	7.99697e-07
Eif4ebp1	46.364	38.5818	44.4428	10.6971	14.242	11.9638	6.55845	9.81985	13.2786	0.947688	3.08048	3.30928	1.8126	1.0957e-05	1.99055	0.00247348
Ltb4r1	666.059	709.701	664.028	176.989	199.388	213.354	76.242	78.5588	94.8468	1.89538	14.3756	14.8917	1.79154	1.76503e-41	2.98546	4.22871e-24
Tnxb	22.6166	26.3981	35.2928	2.9174	9.85983	11.9638	0.819806	15.1761	5.69081	0.947688	4.10731	1.65464	1.77176	0.00112376	1.71347	0.0483562
Mrc2	228.428	263.981	190.843	55.4306	83.2608	66.7977	81.9806	120.516	116.662	27.483	19.5097	25.6469	1.74153	6.10905e-16	2.12601	9.56119e-16
Bcl2l1	1701.9	2229.62	2091.43	565.003	537.909	730.787	459.911	461.533	442.935	223.654	252.6	220.067	1.71529	5.53744e-34	0.972243	3.26042e-11
Laptm4b	277.053	279.21	249.664	70.9901	81.0697	93.7162	677.16	681.141	646.855	425.512	384.033	469.09	1.71526	1.39083e-20	0.647262	9.41381e-08
Timp2	1068.63	914.794	813.042	310.217	300.177	269.185	154.124	140.156	150.806	43.5937	41.0731	42.1933	1.66966	2.62647e-34	1.8106	2.39048e-22
Tmem64	10385.5	9252.52	9441.49	2833.77	3131.05	3312.97	2118.38	2760.27	2865.32	1213.99	1201.39	1085.44	1.64822	8.90849e-66	1.14545	2.94401e-21
Slc16a10	204.68	175.649	205.221	85.5771	53.6813	46.8581	46.729	65.1681	59.7535	15.163	21.5634	14.0644	1.64821	1.98613e-12	1.76771	7.85252e-09
Lpcat1	230.689	451.813	350.314	88.4945	138.038	109.668	337.76	399.936	371.8	208.491	295.726	209.312	1.62326	5.13233e-12	0.638474	0.00418074
Irf5	1435.02	1899.64	1938.49	595.15	529.144	636.074	907.526	1056.97	1140.06	593.253	586.318	590.706	1.582	9.12357e-32	0.809838	1.81086e-09
Itsn1	115.345	85.286	65.3571	30.1465	32.8661	26.9185	101.656	133.014	124.249	66.3382	88.3072	51.2938	1.57013	3.40967e-07	0.807774	0.00149291
Spry1	273.661	219.307	194.764	68.0727	81.0697	83.7464	285.293	222.286	223.839	147.839	129.38	139.817	1.56521	1.97139e-14	0.811266	3.94288e-06
Emp1	524.705	591.926	657.492	202.273	211.439	186.436	341.04	650.788	515.967	185.747	316.263	172.082	1.5633	5.61131e-28	1.16404	4.872e-07
Asap2	20.3549	27.4134	30.0643	10.6971	8.7643	6.97887	18.0357	37.494	25.6086	14.2153	8.21462	13.2371	1.55372	0.00237582	1.17319	0.00759561
Cxcl3	672.844	2274.29	2152.86	241.172	1014.47	527.403	80.341	418.683	308.252	47.3844	131.434	53.7758	1.51632	0.0426235	1.79633	0.0191114
Ubtd2	13.57	10.1531	16.9928	4.86233	3.28661	5.98189	12.2971	14.2834	11.3816	2.84306	3.08048	4.96392	1.51023	0.0300146	1.78282	0.00506589
Osm	33.9249	32.4899	22.2214	14.587	13.1464	3.98793	67.2241	49.992	43.6295	12.3199	17.4561	11.5825	1.49081	0.0036463	1.97261	6.00718e-07
Hpn	9.04664	16.245	11.7643	4.86233	4.38215	3.98793	36.0715	51.7774	38.8872	4.73844	5.13414	7.44587	1.49065	0.0387928	2.85548	5.99835e-09
Gm10197	40.7099	84.2707	73.2	17.5044	35.0572	18.9426	50.828	71.4171	51.2173	20.8491	22.5902	32.2655	1.48089	0.000100987	1.18781	0.000737382
Gas2l3	37.3174	55.842	66.6642	17.5044	20.8152	18.9426	15.5763	36.6013	28.454	10.4246	10.2683	8.27319	1.47917	7.19464e-05	1.47785	0.000653449
Enpp1	98.3822	52.7961	65.3571	22.3667	27.3884	28.9125	27.0536	22.3178	32.2479	15.163	11.2951	19.0283	1.46084	1.54711e-05	0.82733	0.026582
KCTD12	578.985	433.537	528.085	220.75	179.668	171.481	127.89	228.535	262.726	130.781	120.139	92.6598	1.42722	8.8426e-19	0.849733	0.000246076
Rpusd2	12.4391	17.2603	24.8357	7.77973	6.57322	5.98189	19.6754	15.1761	23.7117	6.63382	7.18779	11.5825	1.41327	0.0187271	1.18757	0.0165439
Itgb5	203.549	211.184	160.778	71.9625	70.1144	75.7706	433.678	287.454	294.025	235.974	219.741	186.147	1.40473	6.60851e-12	0.664616	0.000330462
4632428N05Rik	308.717	317.792	335.936	126.421	127.082	111.662	163.961	134.8	145.116	71.0766	106.79	79.4227	1.39792	2.77306e-18	0.794479	7.16166e-06
Cd81	56.5415	56.8573	36.6	25.2841	16.4331	15.9517	2012.62	1772.93	1679.74	1212.09	891.286	988.647	1.38117	0.000276579	0.821784	1.86756e-08
Plcg1	238.605	253.827	330.707	115.724	76.6876	126.617	43.4497	71.4171	74.929	16.1107	16.4292	15.7191	1.36093	8.74943e-11	1.9717	2.2477e-10
Fas	24.8783	58.888	35.2928	14.587	24.1018	8.97283	57.3865	100.877	84.4137	45.489	45.1804	35.5747	1.33637	0.00435756	0.944144	0.00646022
Myo7a	65.5881	99.5003	91.4999	30.1465	33.9617	37.8853	86.8995	125.873	117.61	40.7506	58.5292	39.7113	1.33234	5.22102e-06	1.25452	9.05357e-07
Asns	16.9625	77.1635	49.6714	16.5319	26.2929	14.9547	34.4319	91.0568	69.2382	19.9015	33.8853	13.2371	1.32499	0.00622043	1.54747	0.00148945
Stx1a	35.0557	34.5205	33.9857	8.7522	14.242	18.9426	50.828	11.6053	28.454	17.0584	12.3219	14.0644	1.307	0.00270689	1.06928	0.0244489
Smox	1863.61	3641.92	3002.51	926.761	1365.04	1147.53	1240.37	1724.72	1439.77	641.585	747.53	578.296	1.3069	2.22613e-05	1.16328	2.07338e-08
Nlrp3	80.2889	170.572	173.85	46.6784	75.5921	50.846	140.187	230.32	192.539	35.0645	63.6633	67.0129	1.29804	1.61987e-05	1.76186	1.42745e-08
Tmem37	40.7099	43.6583	32.6786	24.3117	9.85983	13.9577	13.1169	12.498	15.1755	0.947688	7.18779	1.65464	1.27654	0.00275114	2.11648	0.000689638
Tesc	41.8407	40.6124	36.6	14.587	23.0063	11.9638	18.0357	12.498	17.0724	3.79075	2.05365	2.48196	1.27522	0.00166034	2.51478	3.55754e-05
Adrbk2	329.072	240.628	256.2	118.641	104.076	120.635	270.536	294.596	294.025	167.741	160.185	212.621	1.26453	7.18694e-12	0.663968	4.91123e-05
Mxi1	246.521	423.384	351.621	139.063	138.038	157.523	275.455	415.112	412.584	135.519	126.3	186.974	1.23371	5.06596e-10	1.29274	3.42608e-09
D330045A20Rik	24.8783	44.6736	23.5286	7.77973	16.4331	15.9517	5.73865	7.14171	2.8454	0.947688	1.02683	0.827319	1.2286	0.0107937	2.50819	0.0120685
Sh3bgrl2	120.999	144.174	122.871	55.4306	61.3501	50.846	45.0894	100.877	98.6407	52.1229	67.7706	43.0206	1.2154	1.1897e-07	0.588042	0.0390164
Art3	538.275	407.139	413.057	215.888	199.388	172.478	157.403	493.671	368.954	776.157	680.787	347.474	1.2088	1.11629e-13	-0.823023	0.0499585
Acoxl	74.6348	60.9186	53.5928	28.2015	25.1974	28.9125	4.09903	3.57086	5.69081	0	0	0.827319	1.2011	0.000157345	3.7314	0.00325533
Ldlr	290.623	286.317	230.057	96.2742	129.273	132.599	134.448	231.213	218.148	54.0182	67.7706	138.99	1.17646	2.91751e-10	1.15346	5.97317e-05
Chst2	109.691	145.189	149.014	61.2654	63.5412	54.834	149.205	99.0912	161.24	68.2336	41.0731	76.1134	1.16893	4.44429e-07	1.13447	6.06959e-06
Slc15a3	105.167	270.072	235.286	96.2742	96.4073	79.7585	744.384	821.297	740.754	393.291	379.926	354.093	1.165	3.36152e-05	1.03306	2.9308e-06
Gm10130	28.2708	34.5205	40.5214	16.5319	20.8152	8.97283	25.414	24.996	25.6086	18.0061	10.2683	15.7191	1.16032	0.00809059	0.78092	0.0480649
Csn3	20.3549	24.3674	20.9143	5.8348	9.85983	13.9577	4.09903	17.8543	10.4332	0	3.08048	2.48196	1.15116	0.0295838	2.53546	0.00164094
Cdk5rap1	91.5972	155.342	87.5785	78.7698	38.3438	33.8974	96.7372	179.435	75.8775	74.8674	57.5023	31.4381	1.14804	0.000546578	1.10851	0.00389953
Chd7	919.365	1184.87	1073.16	535.829	405.349	492.509	848.5	991.805	943.726	518.385	530.87	465.781	1.14726	1.37054e-16	0.878495	3.59655e-11
Rxra	101.775	124.883	91.4999	54.4581	49.2992	40.8762	136.908	108.018	95.7953	53.0705	85.2267	67.8402	1.14191	8.40019e-06	0.730997	0.00183796
4932442E05Rik	123.26	128.944	108.493	58.348	52.5858	52.84	45.0894	41.0648	36.9903	19.9015	31.8316	27.3015	1.14097	8.54875e-07	0.646391	0.0163304
Ehd1	2842.91	3698.77	3403.8	1595.82	1580.86	1359.88	2315.13	2527.27	2433.77	1359.93	1346.17	1249.25	1.13266	1.87863e-21	0.879613	3.62231e-15
Metrnl	202.419	177.679	171.236	100.164	94.2162	57.8249	252.5	220.5	195.384	144.049	129.38	101.76	1.12997	4.08614e-07	0.837563	3.14457e-05
Icos	5434.77	5200.42	5425.95	2712.21	2506.59	2163.45	1002.62	1401.56	1408.48	411.297	411.758	354.92	1.12136	6.47609e-28	1.69516	4.30978e-34
Dyrk2	496.434	558.42	584.293	244.089	244.305	265.197	181.177	175.865	192.539	117.513	134.514	107.552	1.12013	5.23994e-17	0.61661	2.53022e-05
Cd28	36.1866	26.3981	19.6071	14.587	6.57322	16.9487	16.3961	23.2106	16.124	4.73844	12.3219	4.96392	1.10412	0.0258651	1.36502	0.00897787
Mmp9	58.8032	24.3674	20.9143	11.6696	10.9554	25.9215	20.4952	18.747	8.53621	0	5.13414	3.30928	1.09941	0.0309848	2.51923	0.000459473
Gm4980	495.304	516.793	512.4	269.373	227.872	219.336	305.788	257.994	239.962	149.735	157.105	119.134	1.08811	1.98893e-15	0.922987	1.92372e-09
Rab20	494.173	340.129	384.3	157.54	155.566	266.194	626.332	532.057	646.855	216.073	142.729	336.719	1.0714	3.98971e-07	1.37239	8.44604e-08
Phgdh	124.391	120.822	109.8	73.9075	53.6813	47.8551	41.8101	36.6013	40.7841	19.9015	21.5634	18.201	1.01584	2.84922e-05	1.00461	0.000557863
Aldh7a1	64.4573	67.0104	57.5143	29.174	32.8661	31.9034	43.4497	35.7086	43.6295	27.483	20.5365	26.4742	1.01267	0.000804641	0.715182	0.0130257
Gatsl3	83.6814	81.2248	74.5071	37.9262	36.1527	44.8642	31.1526	31.245	30.351	20.8491	21.5634	18.201	1.0094	0.000214295	0.619805	0.0393983
Inpp4a	199.026	240.628	316.328	129.338	120.509	129.608	98.3768	117.838	114.765	45.489	77.0121	57.085	0.990112	4.39485e-07	0.886229	7.78058e-05
Galnt6	83.6814	115.745	87.5785	41.8161	53.6813	49.8491	47.5488	33.9231	71.1351	18.0061	34.9121	31.4381	0.988485	0.000172295	0.85217	0.00793268
Ada	96.1206	121.837	115.029	61.2654	53.6813	53.837	39.3507	52.6701	46.4749	7.58151	15.4024	9.92783	0.97966	3.92958e-05	2.08689	4.31367e-10
4931440P22Rik	201.288	176.664	218.293	105.026	79.9742	116.647	203.312	173.186	185.9	90.9781	120.139	107.552	0.977078	1.03439e-06	0.821832	5.26776e-06
Dennd5a	480.603	829.508	865.328	272.291	421.782	413.747	948.516	1154.28	1395.2	617.893	556.54	700.74	0.974046	3.12509e-06	0.898646	2.38219e-05
Lgals1	429.715	610.201	399.985	282.015	277.171	181.451	25.414	44.6357	56.9081	10.4246	6.16096	4.96392	0.961951	1.03372e-06	2.56133	1.68731e-10
Tgtp1	194.503	253.827	196.071	125.448	99.6939	106.677	124.611	223.178	209.611	318.423	274.163	292.871	0.958883	7.11404e-07	-0.670675	0.000876167
Ccrl2	3750.96	2920.03	2914.93	1809.76	1627.97	1494.47	2572.55	2721.88	2691.75	1402.58	841.998	1409.75	0.958669	9.92875e-15	1.12704	2.14275e-11
Zswim4	2598.65	3575.92	3220.8	1713.49	1556.76	1575.23	2057.71	2371.05	2386.35	1229.15	1228.09	1214.5	0.955339	5.55138e-15	0.892111	5.0195e-14
Lif	649.096	527.961	630.042	284.933	316.61	335.983	990.326	873.967	790.074	538.287	576.05	453.371	0.94572	4.84987e-12	0.761995	1.48871e-08
Man1a	1154.58	1202.13	1384.26	617.516	633.22	702.872	787.834	1134.64	1185.59	749.621	593.506	631.245	0.936196	5.7528e-16	0.653789	1.94534e-05
Sema6a	68.9806	147.22	159.471	53.4857	43.8215	99.6981	13.1169	37.494	43.6295	15.163	14.3756	14.8917	0.927494	0.00570228	1.07655	0.0170743
Antxr2	1290.28	1422.45	1359.43	721.57	716.481	703.869	860.797	1160.53	1075.56	688.022	603.775	591.533	0.927168	2.18858e-20	0.717156	2.6201e-09
Ubl3	4012.18	4843.03	5267.78	2331.97	2454	2646.99	2095.43	3295.9	3522.61	1856.52	1944.81	1964.06	0.925855	6.16582e-16	0.628347	0.000100286
Gm2a	2606.56	3402.3	3127.99	1691.12	1661.93	1572.24	1569.11	1577.43	1558.33	972.328	846.106	931.562	0.891658	3.11513e-15	0.774259	9.71939e-13
Mmd	1390.92	1105.67	1333.28	621.406	662.8	780.636	922.282	1062.33	1094.53	733.511	600.694	695.776	0.890448	5.76786e-12	0.599955	5.03878e-06
Pon3	38.4482	81.2248	56.2071	21.3943	37.2483	36.8883	31.1526	55.3483	55.9596	22.7445	14.3756	21.5103	0.889126	0.0142986	1.26997	0.00075922
Apaf1	525.836	607.155	613.05	317.997	349.476	276.164	414.002	531.165	459.059	256.824	304.968	249.023	0.888651	1.07557e-10	0.794034	2.78511e-08
Stxbp1	111.952	83.2554	103.264	67.1002	44.917	49.8491	161.502	168.723	166.93	119.409	82.1462	110.033	0.876232	0.00076735	0.670287	0.000795332
Susd3	130.045	129.96	132.021	71.9625	72.3054	69.7887	59.0261	42.8503	32.2479	17.0584	15.4024	24.8196	0.872864	3.54923e-05	1.21915	3.43135e-05
Ddx28	251.044	236.567	235.286	128.366	139.133	127.614	104.115	99.0912	91.053	47.3844	69.8243	75.2861	0.87278	1.31494e-07	0.610113	0.00147782
Hlf	117.606	98.485	74.5071	62.2379	46.0126	50.846	80.341	56.241	54.0627	52.1229	35.939	38.884	0.870614	0.00107977	0.590672	0.029864
Il12rb1	1386.4	1410.27	1143.75	689.479	789.882	687.917	484.506	509.74	380.336	246.399	276.217	254.814	0.864225	6.57942e-13	0.824167	3.86672e-09
Gas2l1	54.2798	87.3166	69.2785	48.6233	41.6304	25.9215	141.827	126.765	110.022	82.4489	96.5218	61.2216	0.863322	0.00703137	0.663602	0.00838273
Samsn1	5954.95	6874.66	6555.32	3425.03	3823.42	3531.31	2231.51	4104.7	3768.26	2256.45	2222.05	2248.65	0.846821	3.29837e-19	0.586692	0.000436262
Rassf3	437.631	650.813	660.107	275.208	346.19	355.922	1309.23	1618.49	1724.32	838.704	884.098	1024.22	0.839554	1.05089e-06	0.759246	3.38971e-06
Asb2	1621.61	1282.34	1087.54	775.056	696.762	759.7	2161.01	1242.66	1217.83	946.741	953.923	1031.67	0.83929	2.97292e-09	0.656638	0.000668524
Rnf128	438.762	606.14	546.385	298.547	295.795	301.088	41.8101	127.658	126.146	23.6922	40.0463	41.366	0.830161	1.44682e-08	1.48526	1.92672e-06
Lrrn2	333.595	254.843	279.728	148.787	191.719	149.547	27.0536	32.1377	40.7841	11.3723	7.18779	4.96392	0.826779	2.61233e-06	2.09806	8.94245e-09
Tg	243.128	247.736	220.907	148.787	159.948	95.7102	76.242	99.984	84.4137	30.326	33.8853	32.2655	0.818593	3.9902e-05	1.43356	3.53346e-09
Iigp1	127.784	116.761	81.0428	48.6233	58.0635	78.7615	50.0082	95.5204	88.2076	105.193	135.541	117.479	0.816738	0.00220844	-0.618936	0.0188012
Irf2bp2	384.482	403.078	362.078	168.237	232.254	258.218	360.715	366.905	366.109	215.125	269.029	204.348	0.805652	1.69804e-06	0.670614	2.36437e-05
Ly6g5b	107.429	123.868	115.029	81.6872	66.8278	49.8491	14.7565	21.4251	25.6086	12.3199	4.10731	2.48196	0.804171	0.000908376	1.72043	0.000112866
Slc26a11	74.6348	39.5971	74.5071	50.5683	32.8661	25.9215	71.3232	57.1337	64.4958	29.3783	34.9121	50.4665	0.777842	0.0276782	0.743291	0.0209079
St3gal6	1115	1028.51	1022.19	622.379	572.966	659.005	166.421	302.63	247.55	115.618	154.024	177.046	0.771106	1.98255e-12	0.67761	0.000439794
Tnfsf14	447.809	392.925	433.971	273.263	256.356	225.318	56.5666	41.9576	38.8872	33.1691	16.4292	29.7835	0.75466	1.01301e-07	0.783876	0.00139377
Slc9a9	573.331	513.747	462.728	347.171	260.738	327.01	179.538	217.822	190.642	121.304	124.246	126.58	0.728469	9.53095e-07	0.658854	3.79438e-05
S1pr2	171.886	201.031	189.536	135.173	102.98	101.692	111.494	131.229	105.28	42.646	53.395	54.6031	0.725488	0.000171059	1.20663	5.33087e-09
Wdr90	153.793	217.276	201.3	98.2191	120.509	128.611	228.726	234.784	230.478	123.199	148.89	186.974	0.722284	0.000348576	0.592591	0.00136164
Ccr9	1873.79	1597.08	2241.75	1255.45	1047.33	1167.47	44.2696	51.7774	114.765	18.0061	10.2683	9.10051	0.717726	5.55369e-08	2.49649	4.57426e-09
Ctsl	313.24	322.868	362.078	185.741	202.674	225.318	966.552	1116.79	1091.69	502.275	525.736	528.657	0.700185	4.10428e-06	1.02774	1.78899e-20
P2rx7	880.917	448.767	563.378	417.188	297.986	449.639	301.689	220.5	181.157	137.415	136.568	189.456	0.699363	0.00108615	0.60096	0.0162253
Srebf2	1336.64	1771.72	1701.9	893.697	1063.77	1026.89	1449.42	1346.21	1417.01	795.11	829.677	989.474	0.689108	7.70332e-08	0.687459	9.03792e-08
Pck2	107.429	75.1329	78.4285	56.4031	44.917	62.8098	194.294	127.658	110.971	71.0766	83.173	101.76	0.666296	0.0129003	0.757852	0.00242322
Pxdc1	4486	6247.2	6044.22	2271.68	3757.69	4565.18	13445.6	14269.1	14593.1	7047.01	9265.06	11357.4	0.663228	0.0320836	0.612579	0.00342113
Srxn1	800.628	1176.74	1198.65	804.23	617.883	589.216	1405.15	1567.61	1523.24	1098.37	832.757	765.27	0.658379	6.76981e-05	0.737823	2.01175e-05
Trf	245.39	332.006	321.557	199.356	167.617	202.387	143.466	172.294	170.724	93.8211	93.4413	108.379	0.657451	0.000116786	0.713647	5.49436e-05
Irg1	80.2889	60.9186	57.5143	43.761	51.4902	31.9034	4.09903	3.57086	5.69081	0	2.05365	0	0.64897	0.0312792	2.83538	0.0115054
Syne2	310.978	268.042	303.257	216.86	162.139	182.448	123.791	113.375	138.476	68.2336	80.0925	62.049	0.648547	8.04486e-05	0.841433	5.77001e-06
Cd163l1	314.371	421.354	513.707	247.007	290.317	261.209	161.502	238.355	324.376	11.3723	35.939	29.7835	0.644615	0.000256683	3.23227	6.86083e-27
Cxcr6	31027.7	32486.9	31878.6	21715.2	19622.2	19971.5	7385.64	11020.6	10520.4	6253.8	5659.87	5731.67	0.63777	7.14588e-15	0.713018	3.03486e-08
Ap5b1	68.9806	46.7042	58.8214	31.1189	36.1527	44.8642	50.828	31.245	32.2479	19.9015	18.4829	29.7835	0.635048	0.0428263	0.739327	0.0271971
Tubb6	525.836	698.533	590.828	410.381	394.393	383.838	2201.18	2346.05	2034.46	1592.12	1430.37	1257.53	0.612083	7.2452e-06	0.621385	3.5413e-07
Ninj1	481.734	661.982	602.592	402.601	392.202	349.94	1458.44	1129.28	1269.05	931.578	808.113	829.801	0.609954	2.53584e-05	0.586186	1.49309e-05
Mgat4b	130.045	161.434	134.636	91.4119	105.172	83.7464	126.25	102.662	90.1045	60.6521	49.2877	80.25	0.608997	0.00340216	0.739626	0.000916767
Glrx	287.231	311.7	230.057	195.466	189.528	163.505	137.727	133.907	81.5683	102.35	61.6096	62.049	0.599857	0.000433866	0.648407	0.00641777
Kcna3	374.305	431.507	420.9	283.96	247.591	280.152	300.049	270.492	252.293	137.415	180.722	166.291	0.594735	1.90504e-05	0.76671	1.31929e-07
Zap70	1477.99	2044.83	1896.66	1275.88	1218.24	1096.68	1073.13	1032.87	1032.88	532.601	603.775	513.765	0.594006	4.66248e-06	0.928882	4.26024e-13
Slc25a33	151.531	138.082	162.086	99.1916	97.5028	102.689	127.07	162.474	138.476	85.2919	59.556	62.8763	0.590175	0.00237903	1.0423	7.17678e-08
Flcn	178.671	320.838	303.257	190.603	175.286	168.49	306.608	371.369	401.202	239.765	230.009	241.577	0.586855	0.00475517	0.600002	0.00136966
Gm26616	90.4664	117.776	104.571	75.8524	65.7322	66.7977	117.232	96.4131	95.7953	52.1229	75.9852	71.1495	0.586665	0.0117129	0.637598	0.00282134
Dck	46.364	40.6124	32.6786	66.1277	64.6367	50.846	76.242	83.0224	68.2897	149.735	100.629	93.4871	-0.595909	0.0475978	-0.593263	0.012275
Igfbp4	55.4107	35.5358	64.05	68.0727	76.6876	87.7344	347.598	356.193	314.891	190.485	259.787	189.456	-0.596342	0.0369516	0.67431	0.00021667
Plekha1	532.621	511.716	405.214	698.231	738.392	760.697	595.18	661.501	713.248	1188.4	1122.32	1230.22	-0.597306	4.39452e-06	-0.847231	3.12549e-13
Gimap7	400.314	233.521	320.25	530.967	451.361	494.503	88.5391	57.1337	62.5989	99.5073	86.2535	137.335	-0.632909	0.000322838	-0.635026	0.00683381
Zfp607	44.1024	34.5205	41.8285	69.0451	59.159	60.8159	17.2159	14.2834	18.0209	32.2214	26.6975	22.3376	-0.65556	0.02427	-0.709591	0.0322425
Nup35	41.8407	35.5358	41.8285	67.1002	48.2036	71.7827	37.7111	65.1681	36.9903	82.4489	69.8243	65.3582	-0.657027	0.0295099	-0.637139	0.0202431
Hopx	295.147	145.189	180.386	409.408	334.139	238.279	183.637	257.994	271.262	177.218	129.38	152.227	-0.66235	0.00632962	0.633888	0.0124629
Pias3	58.8032	40.6124	32.6786	62.2379	72.3054	76.7676	76.242	60.7045	71.1351	104.246	109.871	114.997	-0.671809	0.0234982	-0.661089	0.00252339
Dnajc15	360.735	283.271	288.878	504.71	522.571	469.578	249.221	224.964	238.066	423.617	406.624	354.92	-0.681698	1.1842e-06	-0.732616	4.00109e-08
Slc13a4	48.6257	53.8114	82.35	87.522	84.3564	123.626	1.63961	2.67814	6.63928	1.89538	14.3756	12.4098	-0.688115	0.0123858	-1.42409	0.0157042
Lgals3	251.044	188.848	249.664	333.556	495.183	293.112	25.414	10.7126	15.1755	7.58151	3.08048	4.96392	-0.703058	0.000431604	1.7187	0.000171941
Ldhb	178.671	161.434	128.1	285.905	289.222	211.36	745.204	391.901	417.326	1466.07	1379.03	1546.26	-0.743801	8.25664e-05	-1.49714	5.03438e-13
Fam110b	38.4482	34.5205	43.1357	63.2103	58.0635	75.7706	26.2338	28.5668	32.2479	39.8029	51.3414	70.3222	-0.77031	0.00871098	-0.901434	0.00188935
Gsn	280.446	304.593	283.65	494.985	535.718	458.611	333.661	256.209	277.901	444.466	456.938	434.343	-0.775908	4.7493e-09	-0.619912	1.03142e-06
Pkp2	23.7474	24.3674	19.6071	38.8987	43.8215	33.8974	25.414	18.747	19.9178	43.5937	55.4487	60.3943	-0.776332	0.0366286	-1.31223	2.01826e-05
Ust	200.157	196.97	147.707	321.886	326.47	289.125	88.5391	59.8118	87.2591	138.362	121.166	116.652	-0.777418	2.31996e-06	-0.673298	0.000421065
Auts2	22.6166	17.2603	20.9143	43.761	29.5795	32.9004	43.4497	40.1721	60.702	75.8151	128.353	52.1211	-0.812775	0.0406157	-0.824534	0.0126826
Chst12	506.612	391.91	477.107	775.056	770.163	869.368	200.853	110.697	135.631	201.858	232.063	250.678	-0.813837	4.10634e-10	-0.611574	0.00110514
Guf1	415.015	482.272	500.635	759.496	943.257	785.621	118.872	272.278	243.756	358.226	335.773	320.173	-0.831845	2.73472e-10	-0.67813	0.00167702
Eps8l3	1085.6	906.672	862.714	1640.55	1848.17	1805.53	132.809	136.585	178.312	484.269	552.433	576.642	-0.890212	1.13532e-14	-1.85352	1.82374e-38
Uprt	22.6166	15.2296	20.9143	30.1465	35.0572	43.8672	22.9546	20.5324	20.8663	46.4367	32.8585	36.4021	-0.899541	0.0244864	-0.845295	0.0104385
Lnx1	32.7941	24.3674	19.6071	29.174	54.7769	60.8159	40.1705	97.3058	89.156	167.741	125.273	202.693	-0.907498	0.0189729	-1.1346	0.000461148
Prrg1	27.1399	11.1684	22.2214	48.6233	24.1018	39.8793	34.4319	25.8887	37.9387	80.5535	59.556	69.4948	-0.91114	0.037386	-1.09492	0.000756428
Tmem205	16.9625	31.4746	10.4571	39.8711	37.2483	37.8853	24.5942	16.9616	18.0209	55.9136	44.1536	31.4381	-0.94081	0.0261731	-1.133	0.00241535
Mpdz	19.2241	18.2756	24.8357	38.8987	35.0572	47.8551	70.5034	91.9495	133.734	42.646	52.3682	59.567	-0.977413	0.0100962	0.931714	0.000997499
Pdcd1	45.2332	36.5511	49.6714	61.2654	111.745	89.7283	4708.15	4768.88	4155.24	1902.01	2063.92	1758.88	-1.00232	0.000745822	1.2521	2.98677e-21
Eya4	12.4391	13.199	9.14999	21.3943	21.9107	27.9155	0	0	0	0.947688	0	4.1366	-1.02378	0.0369556	-3.47686	0.0133388
Tanc1	67.8498	83.2554	112.414	188.659	143.515	205.378	90.1787	88.3787	101.486	149.735	162.239	133.198	-1.03727	5.88236e-06	-0.667638	0.00108054
Gnpda2	707.9	754.375	743.764	1352.7	1679.46	1541.33	200.853	296.381	296.871	516.49	503.145	469.917	-1.05131	1.51961e-20	-0.909782	3.47159e-10
Gpr98	55.4107	46.7042	50.9785	109.889	105.172	103.686	13.9367	30.3523	26.5571	78.6581	86.2535	49.6392	-1.06022	1.1562e-05	-1.60166	6.35163e-08
Cd3g	41.8407	38.5818	45.75	68.0727	129.273	67.7947	36.8913	31.245	45.5265	12.3199	17.4561	7.44587	-1.07058	0.000670673	1.63246	2.43513e-05
Gpc1	254.437	161.434	232.671	435.665	440.406	501.482	441.056	123.195	209.611	434.041	486.716	531.966	-1.09127	1.61466e-10	-0.907718	0.0237889
Pdzk1	249.913	258.904	175.157	501.793	585.017	379.85	40.1705	38.3867	51.2173	96.6642	84.1998	77.768	-1.09535	4.9469e-09	-0.997056	2.15641e-05
Large	111.952	108.638	138.557	306.327	283.744	181.451	123.791	157.118	127.095	217.968	264.921	152.227	-1.10702	2.8342e-07	-0.635401	0.00571909
Hectd2	67.8498	72.087	81.0428	147.815	157.757	172.478	55.7468	61.5973	73.0321	96.6642	99.6023	124.925	-1.11671	7.64931e-08	-0.763091	0.000149836
Hsbp1l1	31.6632	58.888	45.75	94.3293	130.369	72.7796	13.1169	51.7774	36.9903	79.6058	84.1998	60.3943	-1.11845	0.000236915	-1.14228	0.00214494
4930550C14Rik	32.7941	27.4134	37.9071	62.2379	82.1653	67.7947	11.4773	5.35628	10.4332	12.3199	31.8316	25.6469	-1.11956	0.000221737	-1.34886	0.00137841
Klrb1a	24.8783	10.1531	11.7643	43.761	41.6304	16.9487	11.4773	3.57086	8.53621	29.3783	16.4292	26.4742	-1.12776	0.0236844	-1.6126	0.00249727
Zfp839	44.1024	28.4287	36.6	85.5771	89.834	66.7977	112.313	47.3138	56.9081	112.775	101.656	114.997	-1.15425	8.81692e-05	-0.600561	0.0368636
Plod2	62.1957	90.3626	112.414	177.961	209.248	209.366	127.07	225.857	232.375	336.429	311.129	306.108	-1.17643	7.60848e-08	-0.706733	0.00117305
Prc1	204.68	224.383	205.221	401.629	526.953	519.427	46.729	66.9535	37.9387	70.1289	102.683	82.7319	-1.18852	1.1453e-14	-0.747699	0.000652137
BC067074	124.391	74.1176	132.021	235.337	213.63	318.037	1.63961	4.46357	4.74234	6.63382	7.18779	9.10051	-1.22307	8.94566e-08	-1.11847	0.0453078
Tdrd9	263.483	195.955	211.757	509.572	510.52	572.267	392.687	446.357	365.16	660.539	672.572	561.75	-1.24725	4.6996e-17	-0.652611	1.3908e-06
Plekhh2	10.1775	19.2909	20.9143	33.0639	44.917	41.8732	29.513	56.241	40.7841	73.9197	86.2535	76.1134	-1.25282	0.00240748	-0.90332	0.00185806
Ccr7	62.1957	48.7349	26.1428	124.476	117.222	88.7313	2947.2	2501.38	3042.69	2064.07	1270.19	1937.58	-1.25724	1.89616e-05	0.687313	0.00031107
Lysmd2	251.044	177.679	232.671	482.343	569.679	529.397	166.421	176.757	178.312	327.9	363.497	380.567	-1.26081	5.05431e-16	-1.04094	1.05488e-12
Swap70	298.539	329.976	266.657	635.993	850.137	712.842	850.139	860.576	777.744	1159.97	1380.06	1284	-1.29273	9.22559e-19	-0.619388	8.77686e-07
Ablim3	578.985	448.767	853.564	1485.93	1388.05	1734.75	756.681	607.045	826.116	1467.97	1611.09	1640.57	-1.29578	1.01403e-12	-1.10801	1.94465e-09
Ndrg1	63.3265	140.113	103.264	255.759	293.604	222.327	475.488	487.422	531.142	2000.57	1773.33	1400.65	-1.32595	2.21489e-08	-1.79218	1.93683e-21
Ccdc67	7.91581	6.09186	3.92143	19.4493	8.7643	17.9457	17.2159	24.996	24.6602	47.3844	57.5023	57.085	-1.35778	0.0406956	-1.28137	0.000291922
Cst7	93.8589	54.8267	87.5785	229.502	204.865	187.432	18.0357	17.8543	18.0209	5.68613	6.16096	9.92783	-1.40497	1.76621e-10	1.28373	0.00150209
Stk36	14.7008	13.199	10.4571	39.8711	32.8661	30.9064	17.2159	10.7126	15.1755	27.483	30.8048	17.3737	-1.42761	0.00111826	-0.797916	0.0437689
Rap1gap2	89.3356	76.1482	65.3571	187.686	197.197	241.269	591.9	232.998	233.323	584.724	713.645	682.539	-1.43571	3.96756e-12	-0.903507	0.0120036
Clvs1	19.2241	10.1531	9.14999	30.1465	37.2483	39.8793	30.3328	49.0993	48.3719	79.6058	68.7974	71.9768	-1.47182	0.00108296	-0.791547	0.0056078
Slc9a2	73.504	77.1635	65.3571	204.218	204.865	205.378	145.926	142.834	140.373	244.504	244.385	267.224	-1.50321	1.10475e-14	-0.818055	6.84999e-09
Psd2	538.275	413.231	454.885	1498.57	1204	1293.08	506.64	310.664	358.521	838.704	766.013	792.572	-1.50749	7.46598e-30	-1.0262	4.57118e-10
Edil3	24.8783	21.3215	30.0643	73.9075	66.8278	81.7525	1.63961	8.92714	5.69081	36.0122	26.6975	33.9201	-1.55682	6.96958e-07	-2.5994	5.45997e-09
Morc1	14.7008	9.13779	16.9928	32.0914	33.9617	52.84	9.83768	4.46357	10.4332	22.7445	31.8316	25.6469	-1.56013	0.000418843	-1.6941	0.000163389
Klrb1c	1176.06	540.145	592.135	3357.93	1964.3	2009.91	50.828	38.3867	32.2479	104.246	71.8779	65.3582	-1.66739	0.000146756	-0.987535	0.0120311
Slc6a13	52.0182	49.7502	50.9785	166.292	165.426	169.487	337.76	282.99	235.22	530.705	550.379	723.077	-1.71503	3.16923e-15	-1.0751	5.56462e-11
Immp2l	29.4016	26.3981	31.3714	105.999	105.172	78.7615	95.0976	69.6317	103.383	138.362	125.273	153.054	-1.73852	2.30076e-09	-0.639013	0.00247377
Wwtr1	257.829	191.894	138.557	972.467	635.412	371.874	261.518	325.841	219.096	822.593	802.979	362.366	-1.75003	0.000120059	-1.30111	0.00260513
Pmp22	15.8316	28.4287	19.6071	58.348	65.7322	96.7072	8.19806	17.8543	13.2786	1.89538	11.2951	2.48196	-1.77905	5.73424e-07	1.37372	0.0133003
Aatk	56.5415	63.9645	43.1357	255.759	159.948	150.544	149.205	98.1985	146.064	336.429	349.121	320.173	-1.78368	6.68948e-12	-1.35313	4.93269e-10
Atp6v0d2	130.045	48.7349	56.2071	287.85	320.992	239.276	3.27923	4.46357	7.58775	36.0122	31.8316	29.7835	-1.85091	3.06766e-11	-2.69127	9.68622e-09
Usp18	13.57	2.03062	5.22857	35.0088	25.1974	14.9547	35.2517	31.245	29.4025	75.8151	44.1536	55.4304	-1.86125	0.00333519	-0.870472	0.0224886
Abca1	72.3731	14.2143	39.2143	207.135	116.127	139.577	384.489	151.761	254.19	642.533	713.645	481.5	-1.8821	0.00388266	-1.21666	0.0183902
Fry	4.52332	3.04593	10.4571	19.4493	26.2929	21.9336	20.4952	26.7814	25.6086	39.8029	51.3414	32.2655	-1.95107	0.00135026	-0.756437	0.0355429
Ankrd35	4.52332	5.07655	3.92143	18.4769	14.242	19.9396	31.1526	18.747	36.0418	117.513	58.5292	147.263	-1.95443	0.00318375	-1.91672	2.13849e-07
Nmrk1	287.231	378.71	333.321	1358.54	1324.5	1221.3	2278.24	3243.23	2995.26	5942.01	4653.58	4273.93	-1.96429	1.11492e-54	-0.804094	1.17823e-07
Cd7	693.199	545.221	533.314	2108.31	2600.81	2412.69	1623.22	961.453	1241.55	2041.32	2111.16	2929.54	-2.00637	8.88553e-55	-0.888227	1.30676e-06
Plek	663.797	373.634	362.078	2246.4	1771.48	1759.67	555.009	748.094	746.445	507.013	228.983	487.291	-2.04534	3.71774e-11	0.743536	0.0264607
Lum	4.52332	3.04593	1.30714	4.86233	18.6241	13.9577	7.37826	16.9616	36.0418	77.7104	83.173	102.588	-2.04789	0.0167935	-2.13879	5.41086e-06
Susd2	346.034	412.216	339.857	1626.94	1726.57	1293.08	148.385	108.911	99.5892	244.504	253.626	184.492	-2.07852	3.23037e-51	-0.928278	3.45725e-07
Ddc	62.1957	32.4899	27.45	172.127	164.331	194.411	208.231	210.68	180.209	516.49	379.926	426.07	-2.11475	2.7646e-15	-1.14185	6.97778e-10
Gng4	7.91581	8.12248	7.84285	38.8987	46.0126	21.9336	8.19806	9.81985	18.0209	40.7506	40.0463	19.8557	-2.15769	2.6189e-05	-1.48623	0.00109035
Cntn1	168.494	158.388	163.393	822.707	677.042	702.872	1757.67	1385.49	1472.97	3242.99	2536.26	2562.21	-2.16879	9.25521e-53	-0.853262	7.67882e-11
Ncald	31.6632	20.3062	23.5286	154.622	86.5474	110.665	36.8913	55.3483	51.2173	71.0766	101.656	71.1495	-2.22566	2.32533e-12	-0.765202	0.00670326
Slc6a7	2.26166	4.06124	1.30714	10.6971	6.57322	19.9396	41.8101	50.8847	62.5989	90.0304	71.8779	114.17	-2.2519	0.00992616	-0.836653	0.00874387
Sdc2	19.2241	16.245	19.6071	79.7423	60.2545	131.602	159.042	116.946	179.261	322.214	239.251	464.126	-2.30952	4.41537e-10	-1.17386	2.0425e-05
Cnn3	107.429	160.419	167.314	478.454	815.08	880.334	515.658	474.031	561.493	1250.95	1063.79	1006.85	-2.32142	1.78651e-26	-1.09854	3.12865e-08
Mapk10	114.214	83.2554	61.4357	482.343	461.221	385.832	573.865	435.644	508.379	1085.1	948.789	1023.39	-2.35292	9.53507e-33	-1.00984	6.59977e-11
Atp8b4	3.39249	5.07655	2.61428	29.174	23.0063	10.9668	45.0894	33.9231	46.4749	81.5012	74.9584	66.1856	-2.4858	0.000433309	-0.825878	0.00851896
Nek10	16.9625	21.3215	22.2214	93.3568	111.745	134.592	4.09903	22.3178	15.1755	32.2214	35.939	31.4381	-2.49124	1.1637e-15	-1.27427	0.00086927
Dner	2.26166	10.1531	7.84285	57.3755	23.0063	35.8913	0	6.249	2.8454	6.63382	10.2683	10.7552	-2.51656	7.92011e-06	-1.63172	0.0243176
Snx7	5.65415	1.01531	2.61428	17.5044	18.6241	17.9457	12.2971	17.8543	21.8148	30.326	33.8853	31.4381	-2.55845	0.000615218	-0.88726	0.0253105
Nos2	536.013	551.313	793.435	3066.19	4160.85	4221.22	741.105	463.318	705.66	1493.56	1663.46	1867.26	-2.60809	1.60384e-60	-1.39527	1.53443e-13
Klri2	719.208	424.399	469.264	3929.74	3290.99	2692.85	31.9725	66.0608	65.4443	135.519	217.687	168.773	-2.6199	3.54819e-49	-1.67844	3.20213e-07
Tigit	9.04664	3.04593	1.30714	40.8436	25.1974	26.9185	31.9725	20.5324	16.124	36.9598	34.9121	52.9484	-2.77652	8.79936e-06	-0.860152	0.0306049
Slc16a2	3.39249	3.04593	1.30714	18.4769	17.5286	18.9426	160.682	99.0912	105.28	217.021	202.285	191.111	-2.79673	0.0002401	-0.737919	0.000939892
Fgfr1	3.39249	2.03062	7.84285	37.9262	30.675	23.9276	12.2971	1.78543	14.227	1.89538	2.05365	0.827319	-2.85939	3.79054e-06	2.59883	0.00288861
Dapk1	0	1.01531	2.61428	4.86233	8.7643	12.9608	56.5666	51.7774	65.4443	104.246	118.085	96.7964	-2.93462	0.0112386	-0.876283	0.000893199
Piwil4	2.26166	2.03062	0	8.7522	6.57322	19.9396	205.771	150.869	198.23	355.383	258.761	464.126	-2.98094	0.00392594	-0.960025	0.000105842
Cpa3	15.8316	5.07655	23.5286	106.971	154.471	102.689	1.63961	3.57086	8.53621	16.1107	14.3756	7.44587	-3.0773	1.78943e-16	-1.48542	0.00857468
Corin	1.13083	2.03062	2.61428	20.4218	17.5286	12.9608	4.91884	10.7126	7.58775	75.8151	51.3414	32.2655	-3.15611	0.000232388	-2.78365	9.64107e-09
Erbb2	4.52332	8.12248	10.4571	64.1828	69.0188	85.7404	90.9985	33.9231	58.805	154.473	120.139	201.039	-3.26024	8.25482e-14	-1.37071	1.13725e-05
Plac8	127.784	79.1942	98.0357	1000.67	1003.51	980.033	323.824	361.549	521.658	633.056	524.709	920.807	-3.29483	1.26731e-98	-0.786552	0.000192406
Ephx2	2.26166	2.03062	5.22857	29.174	23.0063	43.8672	42.6299	46.4211	59.7535	95.7165	59.556	81.0773	-3.38448	5.84091e-07	-0.672604	0.0280262
Tmem51	1.13083	0	0	3.88987	3.28661	6.97887	109.854	74.988	92.0014	56.8613	50.3145	60.3943	-3.52659	0.0283708	0.723193	0.0103942
Efhd1	4.52332	0	2.61428	31.1189	26.2929	32.9004	0.819806	0.892714	1.89694	4.73844	8.21462	3.30928	-3.71121	5.60436e-07	-2.17248	0.0191379
Dsg2	19.2241	15.2296	6.53571	194.493	209.248	200.393	264.797	222.286	196.333	932.525	708.511	752.033	-3.84981	5.33672e-36	-1.80599	7.27545e-30
Nrxn3	0	0	1.30714	1.94493	9.85983	6.97887	0	0	0	4.73844	6.16096	0.827319	-3.92526	0.0117177	-4.56688	0.00444592
Mal	2.26166	1.01531	5.22857	64.1828	58.0635	50.846	0	0	2.8454	18.0061	13.3488	4.1366	-4.42731	3.67667e-12	-3.71269	0.000121092
Krt25	1.13083	0	0	7.77973	10.9554	9.96981	6.55845	8.92714	8.53621	30.326	42.0999	30.6108	-4.54199	0.00130643	-2.10225	1.17839e-05
Syt13	0	0	0	8.7522	5.47769	0.996981	0.819806	0.892714	1.89694	28.4306	46.2072	45.5026	-4.59184	0.00699604	-5.08125	9.20731e-09
Serpine2	56.5415	68.0257	31.3714	905.366	2180.12	849.428	566.486	734.704	588.999	1410.16	1818.51	1266.63	-4.65306	9.79253e-17	-1.24981	0.00237366
Popdc3	0	0	1.30714	21.3943	2.19107	7.97585	13.1169	6.249	9.48468	28.4306	19.5097	29.7835	-4.68814	0.00157571	-1.42802	0.0223275
Cldn10	0	0	1.30714	17.5044	10.9554	6.97887	31.9725	32.1377	40.7841	192.381	157.105	244.059	-4.84971	0.000488777	-2.5059	4.57809e-19
Thbs2	1.13083	0	0	8.7522	9.85983	23.9276	30.3328	50.8847	51.2173	101.403	56.4755	134.853	-5.11314	0.000199362	-1.15089	0.00356249
Mcf2	0	0	1.30714	9.72467	20.8152	26.9185	43.4497	56.241	63.5474	161.107	125.273	152.227	-5.54338	2.99026e-05	-1.43053	2.65026e-07
Plb1	0	0	0	17.5044	17.5286	9.96981	354.976	181.221	348.088	1050.04	778.335	1434.57	-6.1533	5.34594e-06	-1.88378	4.12792e-07
Lmo1	0	0	0	27.2291	35.0572	20.9366	0.819806	0	1.89694	2.84306	5.13414	4.1366	-7.03904	3.54666e-08	-2.18161	0.0384682
