# Supplementary material for: c-Maf restrains T-bet-driven programming of CCR6-negative group 3 innate lymphoid cells
Source: eLife. 2020 Feb 10;9:e52549. doi: 10.7554/eLife.52549 (PMC7025824; doi:10.7554/eLife.52549)
Supplement: Supplementary file 3. [file elife-52549-supp3.xlsx]

## Sheet: Sheet1
Antigen	Conjugation	Clone	Company
c-Maf	PE	sym0F1	eBioscience
CD127	PE-Dazzle 594	A7R34	Biolegend
RORgt	BV421	Q31-378	BD
RORgt	BV786	Q31-378	BD
T-bet	PE-Cy7	4B10	eBioscience
T-bet	PE	4B10	eBioscience
GATA3	APC	REA174	Miltenyi Biotec
CCR6	PE-Vio770	REA277	Miltenyi Biotec
CCR6	A647	140706	BD
IL-22	APC	IL22JOP	eBioscience
IFN-g	BV785	XMG1.2	Biolegend
IL-17A	BV711	TC11-18H10.1	Biolegend
NKp46	PerCP-eFluor710	29A1.4	eBioscience
NKp46	PE	29A1.4	eBioscience
CD3	BV510	145-2C11	Biolegend
CD4	BV785	RM4-5	Biolegend
TCRß	BV605	H57-597	Biolegend
NK1.1	PE-Cy7	PK136	eBioscience
KLRG1	eF450	2F1	eBioscience
CD45.2	BUV395	104	BD
CD45.2	APC-eF780	104	eBioscience
CD45.1	FITC	A20	eBioscience
CD90.2	eF450	53-2.1	eBioscience
Ki67	A700	SolA15	eBioscience
B220	Biotin	RA3-6B2	eBioscience
Gr-1	Biotin	RB6-8C5	eBioscience
FceRIa	Biotin	MAR-1	Biolegend
F4/80	Biotin	BM8	Biolegend
CD11c	Biotin	N418	eBioscience
CD11b	Biotin	M1/70	eBioscience
CD5	Biotin	53-7.3	eBioscience
CD3	Biotin	145-2C11	eBioscience
TCRgd	Biotin	GL3	BD
CD8a	Biotin	53.6-7	eBioscience
CD19	Biotin	MB19-1	eBioscience
