# Supplementary material for: c-Maf restrains T-bet-driven programming of CCR6-negative group 3 innate lymphoid cells
Source: eLife. 2020 Feb 10;9:e52549. doi: 10.7554/eLife.52549 (PMC7025824; doi:10.7554/eLife.52549)
Supplement: Supplementary file 4. [file elife-52549-supp4.xlsx]

## Sheet: Sheet1
Gene	Sequence fw (5' -> 3')	Sequence rv (5' -> 3')
Hprt	GATACAGGCCAGACTTTGTTGG	CAACAGGACTCCTCGTATTTGC
Maf	GCATGCTGGACATGTATGGT	ATGTACAACGGGAGGCTGAA
Tbx21	CAACAACCCCTTTGCCAAAG	TCCCCCAAGCAGTTGACAGT
Ifng	ATCTGGAGGAACTGGCAAAA	TTCAAGACTTCAAAGAGTCTGAGGTA
Il22	CATGCAGGAGGTGGTACCTT	CAGACGCAAGCATTTCTCAG
