# Supplementary figures and images for: c-Maf restrains T-bet-driven programming of CCR6-negative group 3 innate lymphoid cells
Source: eLife journal article supplement (doi:10.7554/elife.52549), 2020-02-10

Figure 1 - figure suppl 1 revised Tizian et al.

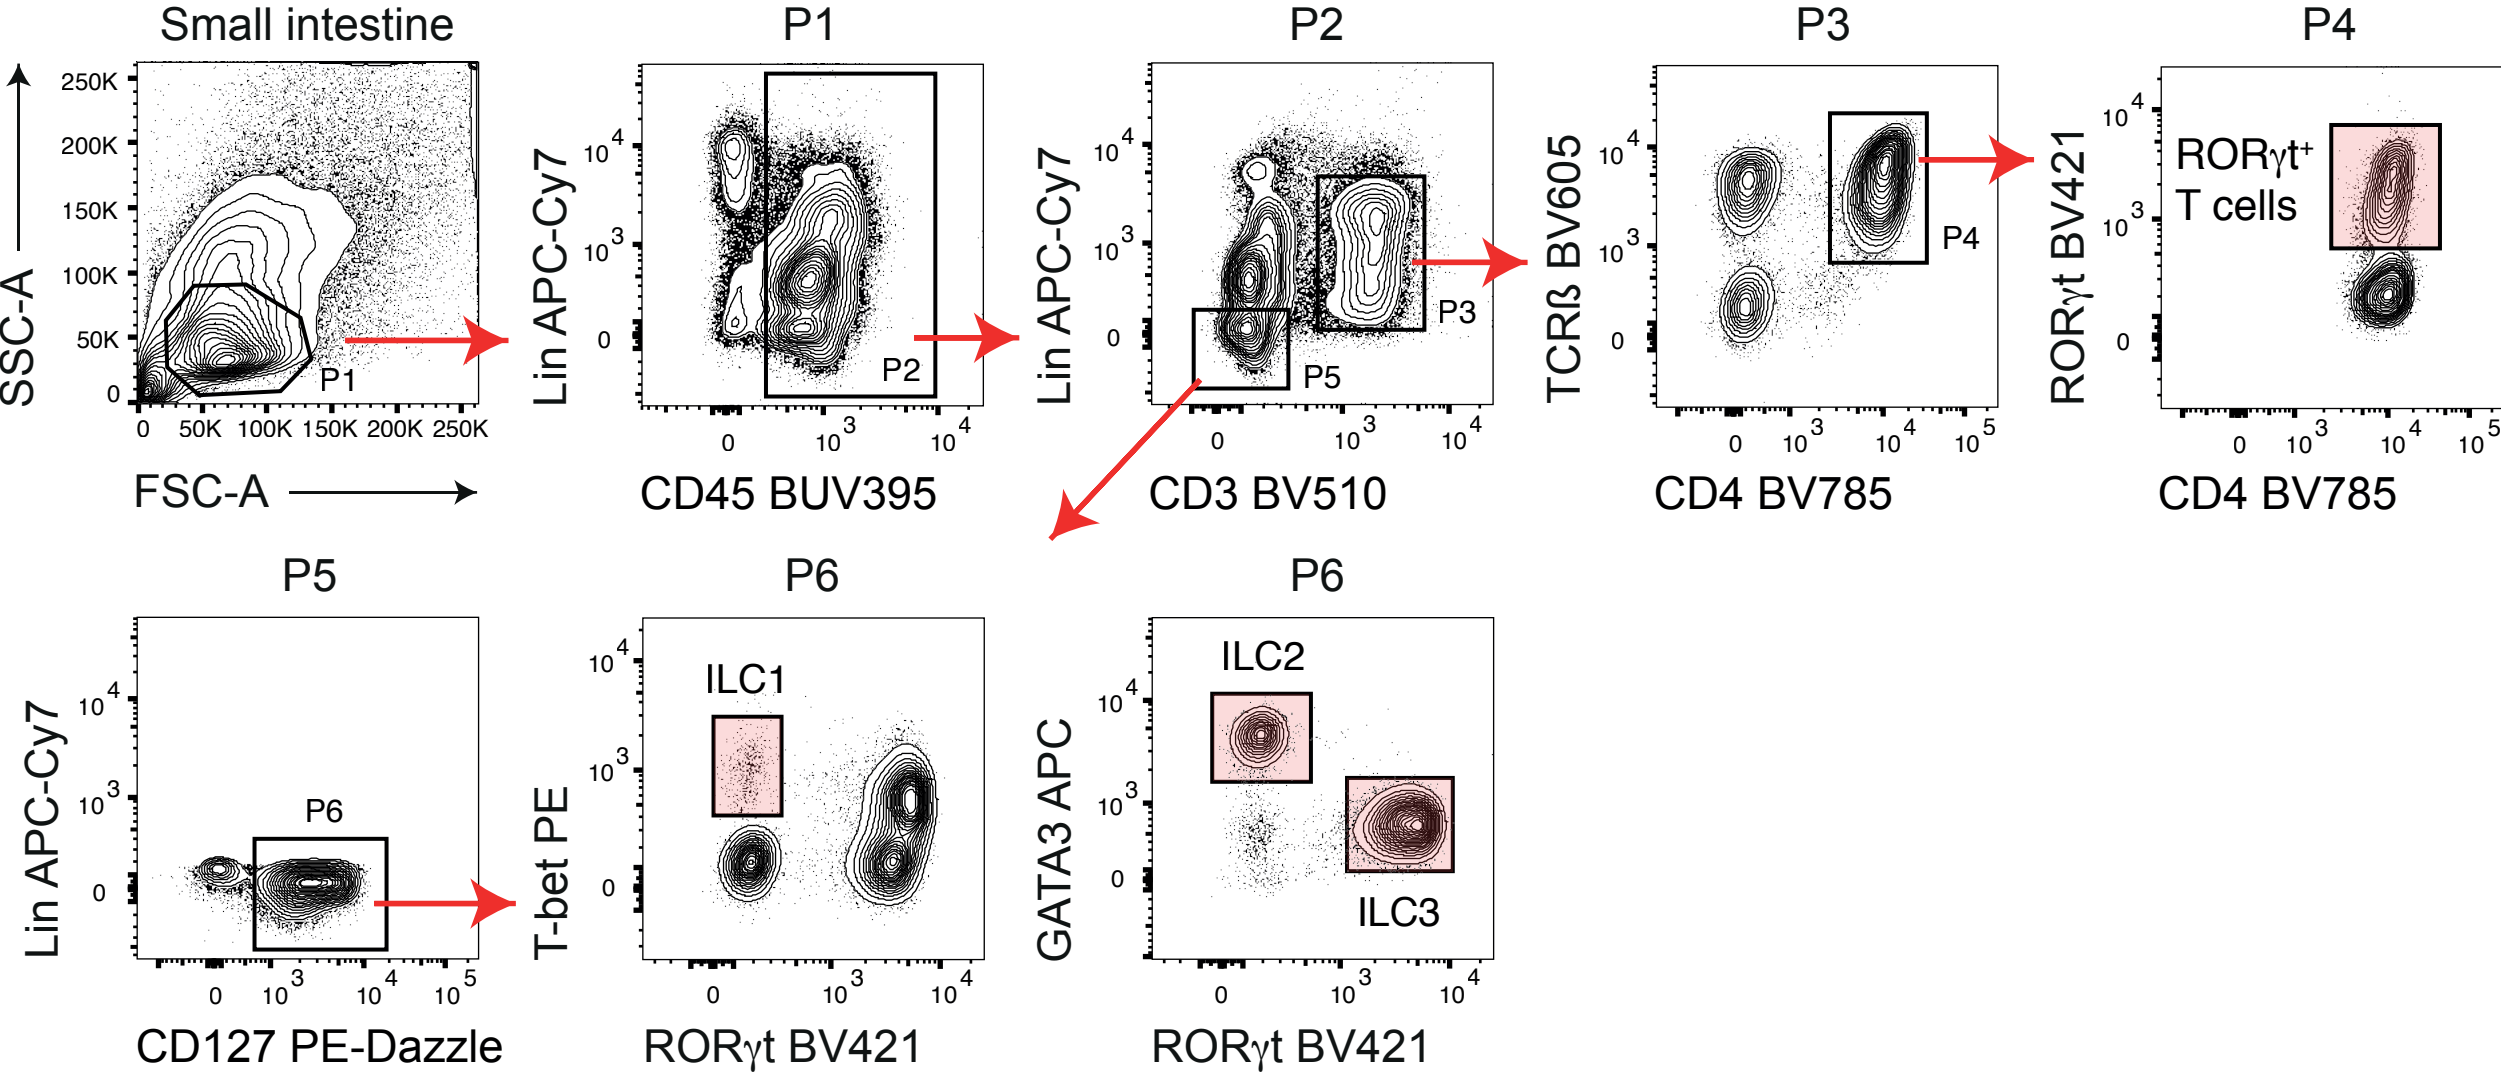

Supplement: supp [file elife-52549-supp-v1.zip]

Figure 3 - figure suppl 2 revised Tizian et al.

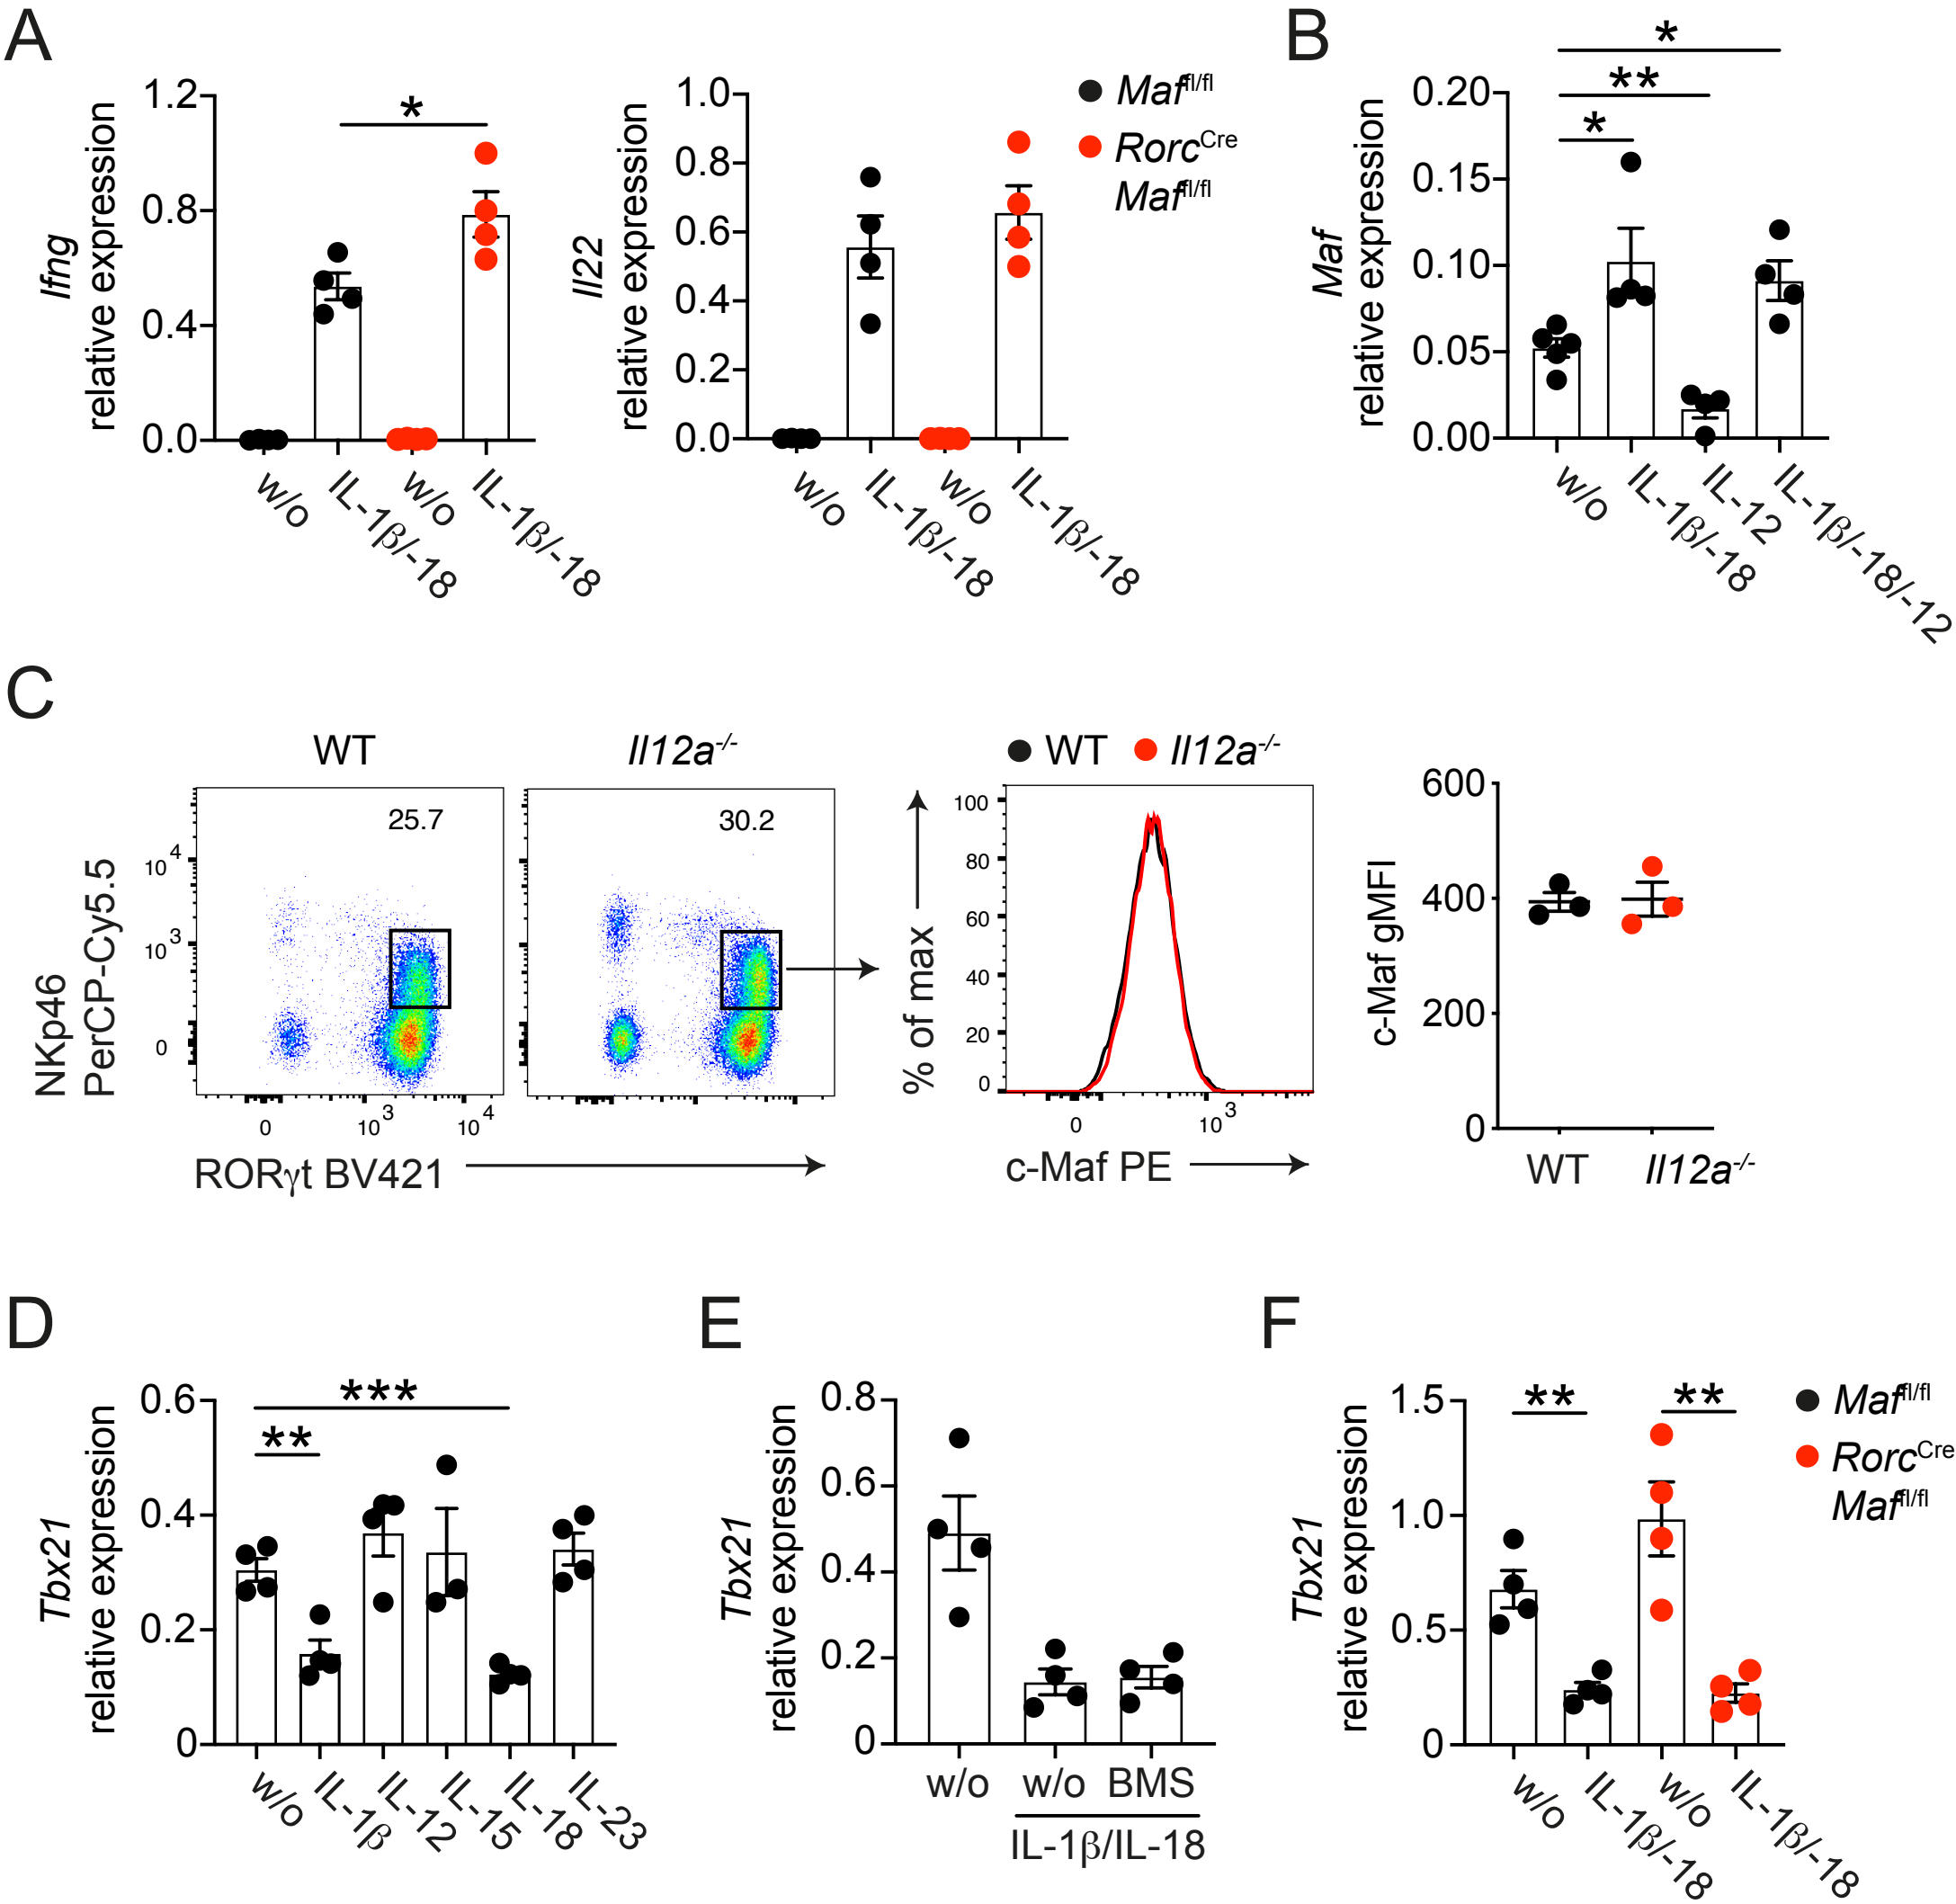

Supplement: supp [file elife-52549-supp-v1.zip]

Figure 3 - figure suppl 1 revised Tizian et al.

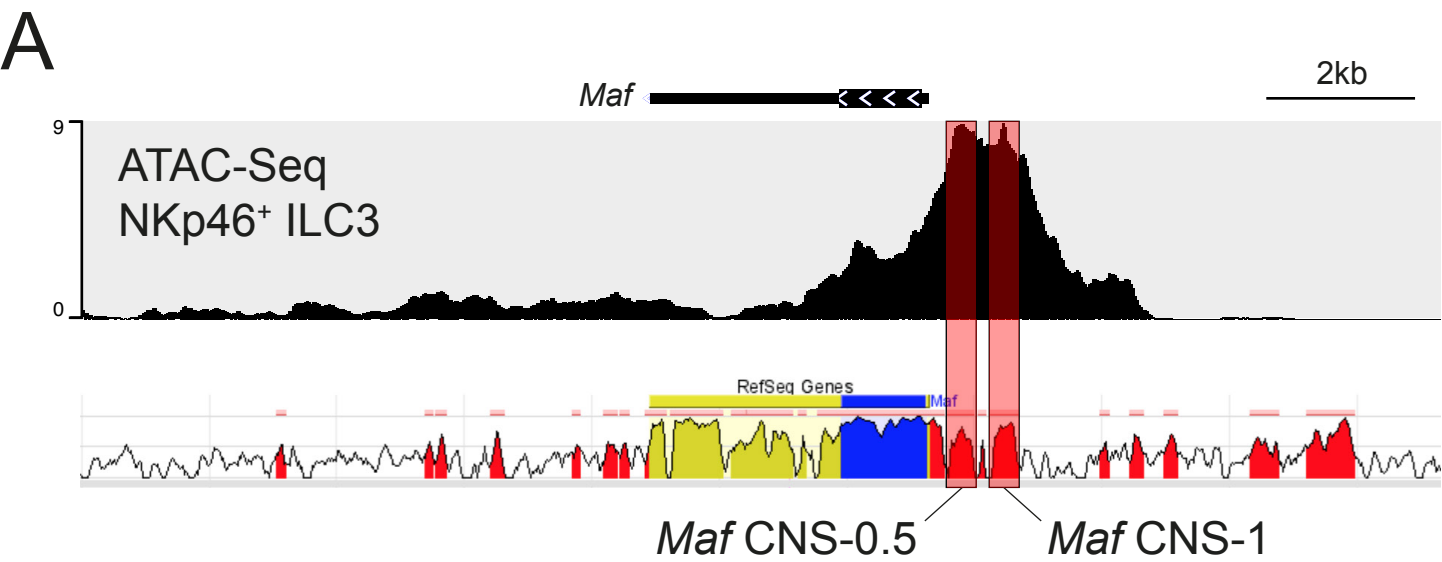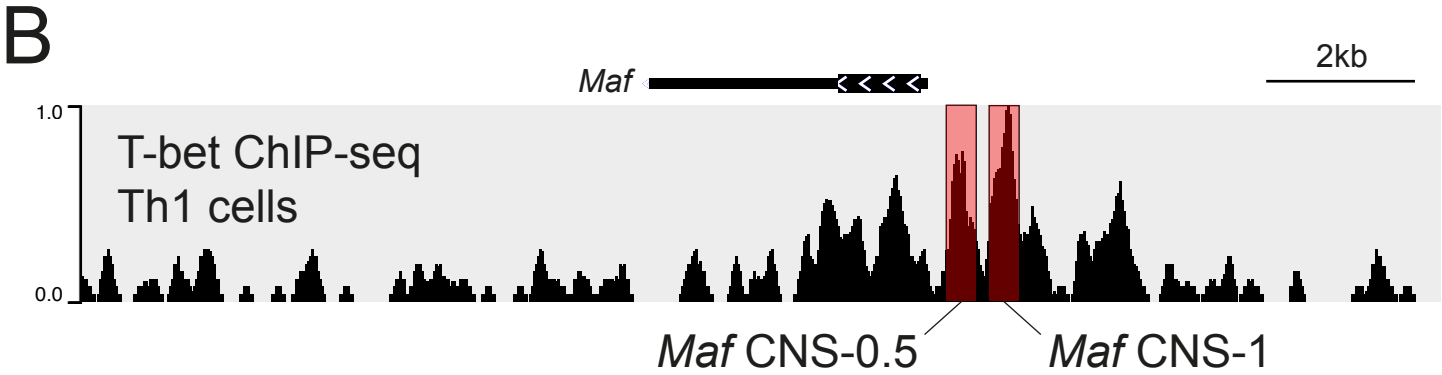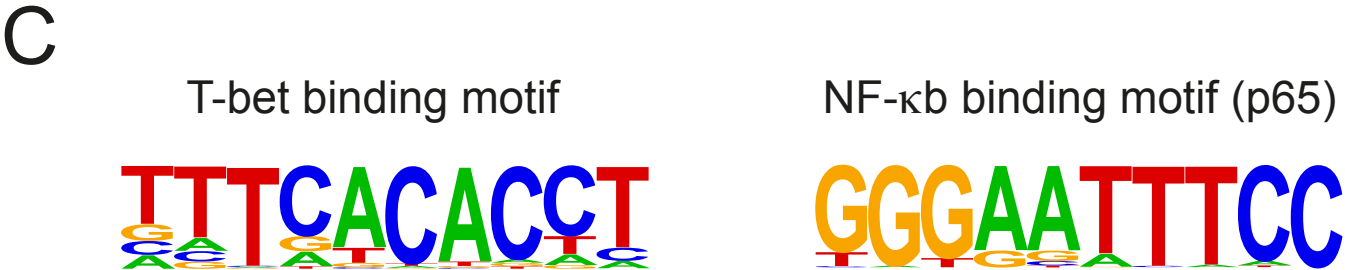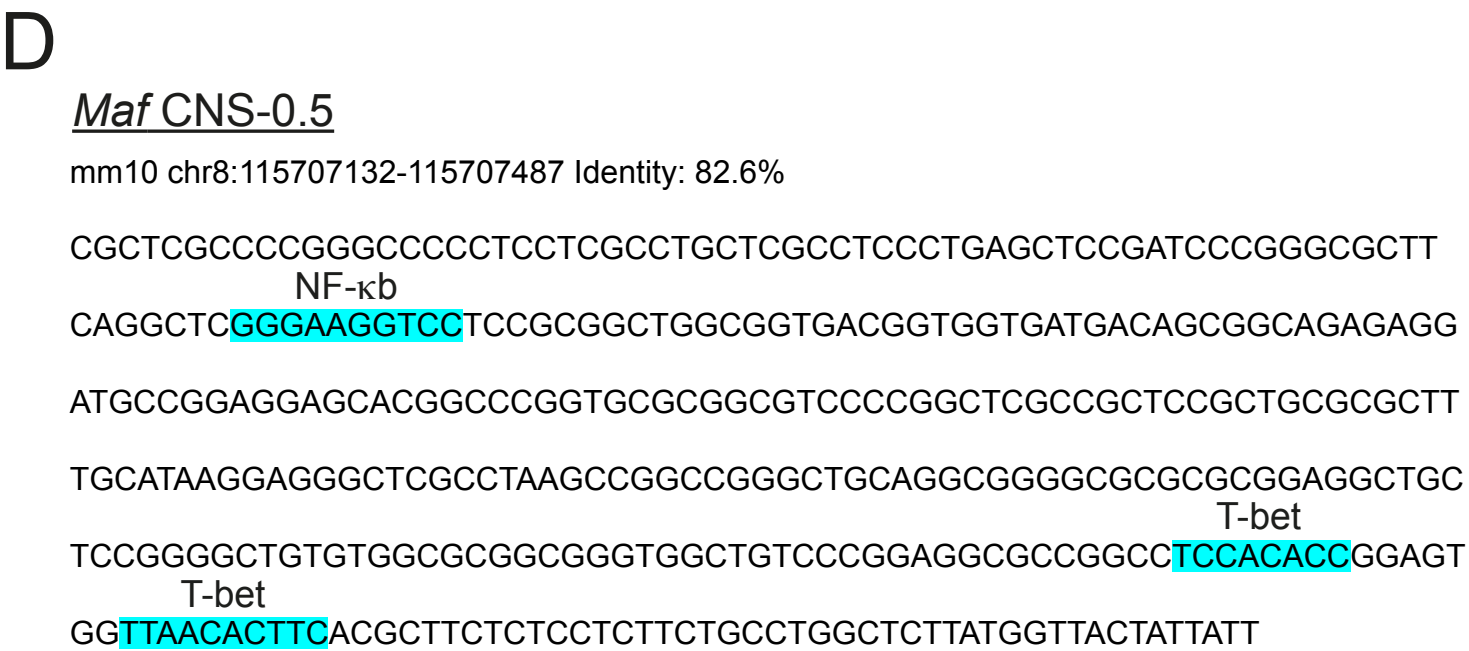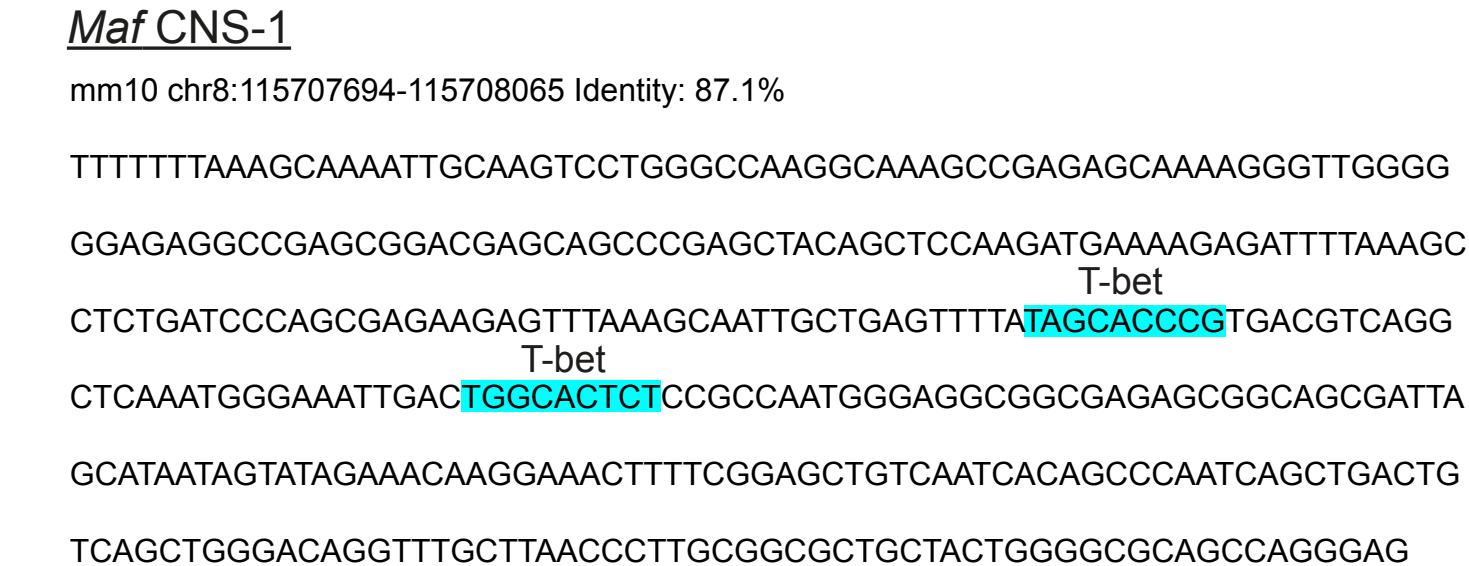

Supplement: supp [file elife-52549-supp-v1.zip]

Figure 2 - figure suppl 1 revised Tizian et al.

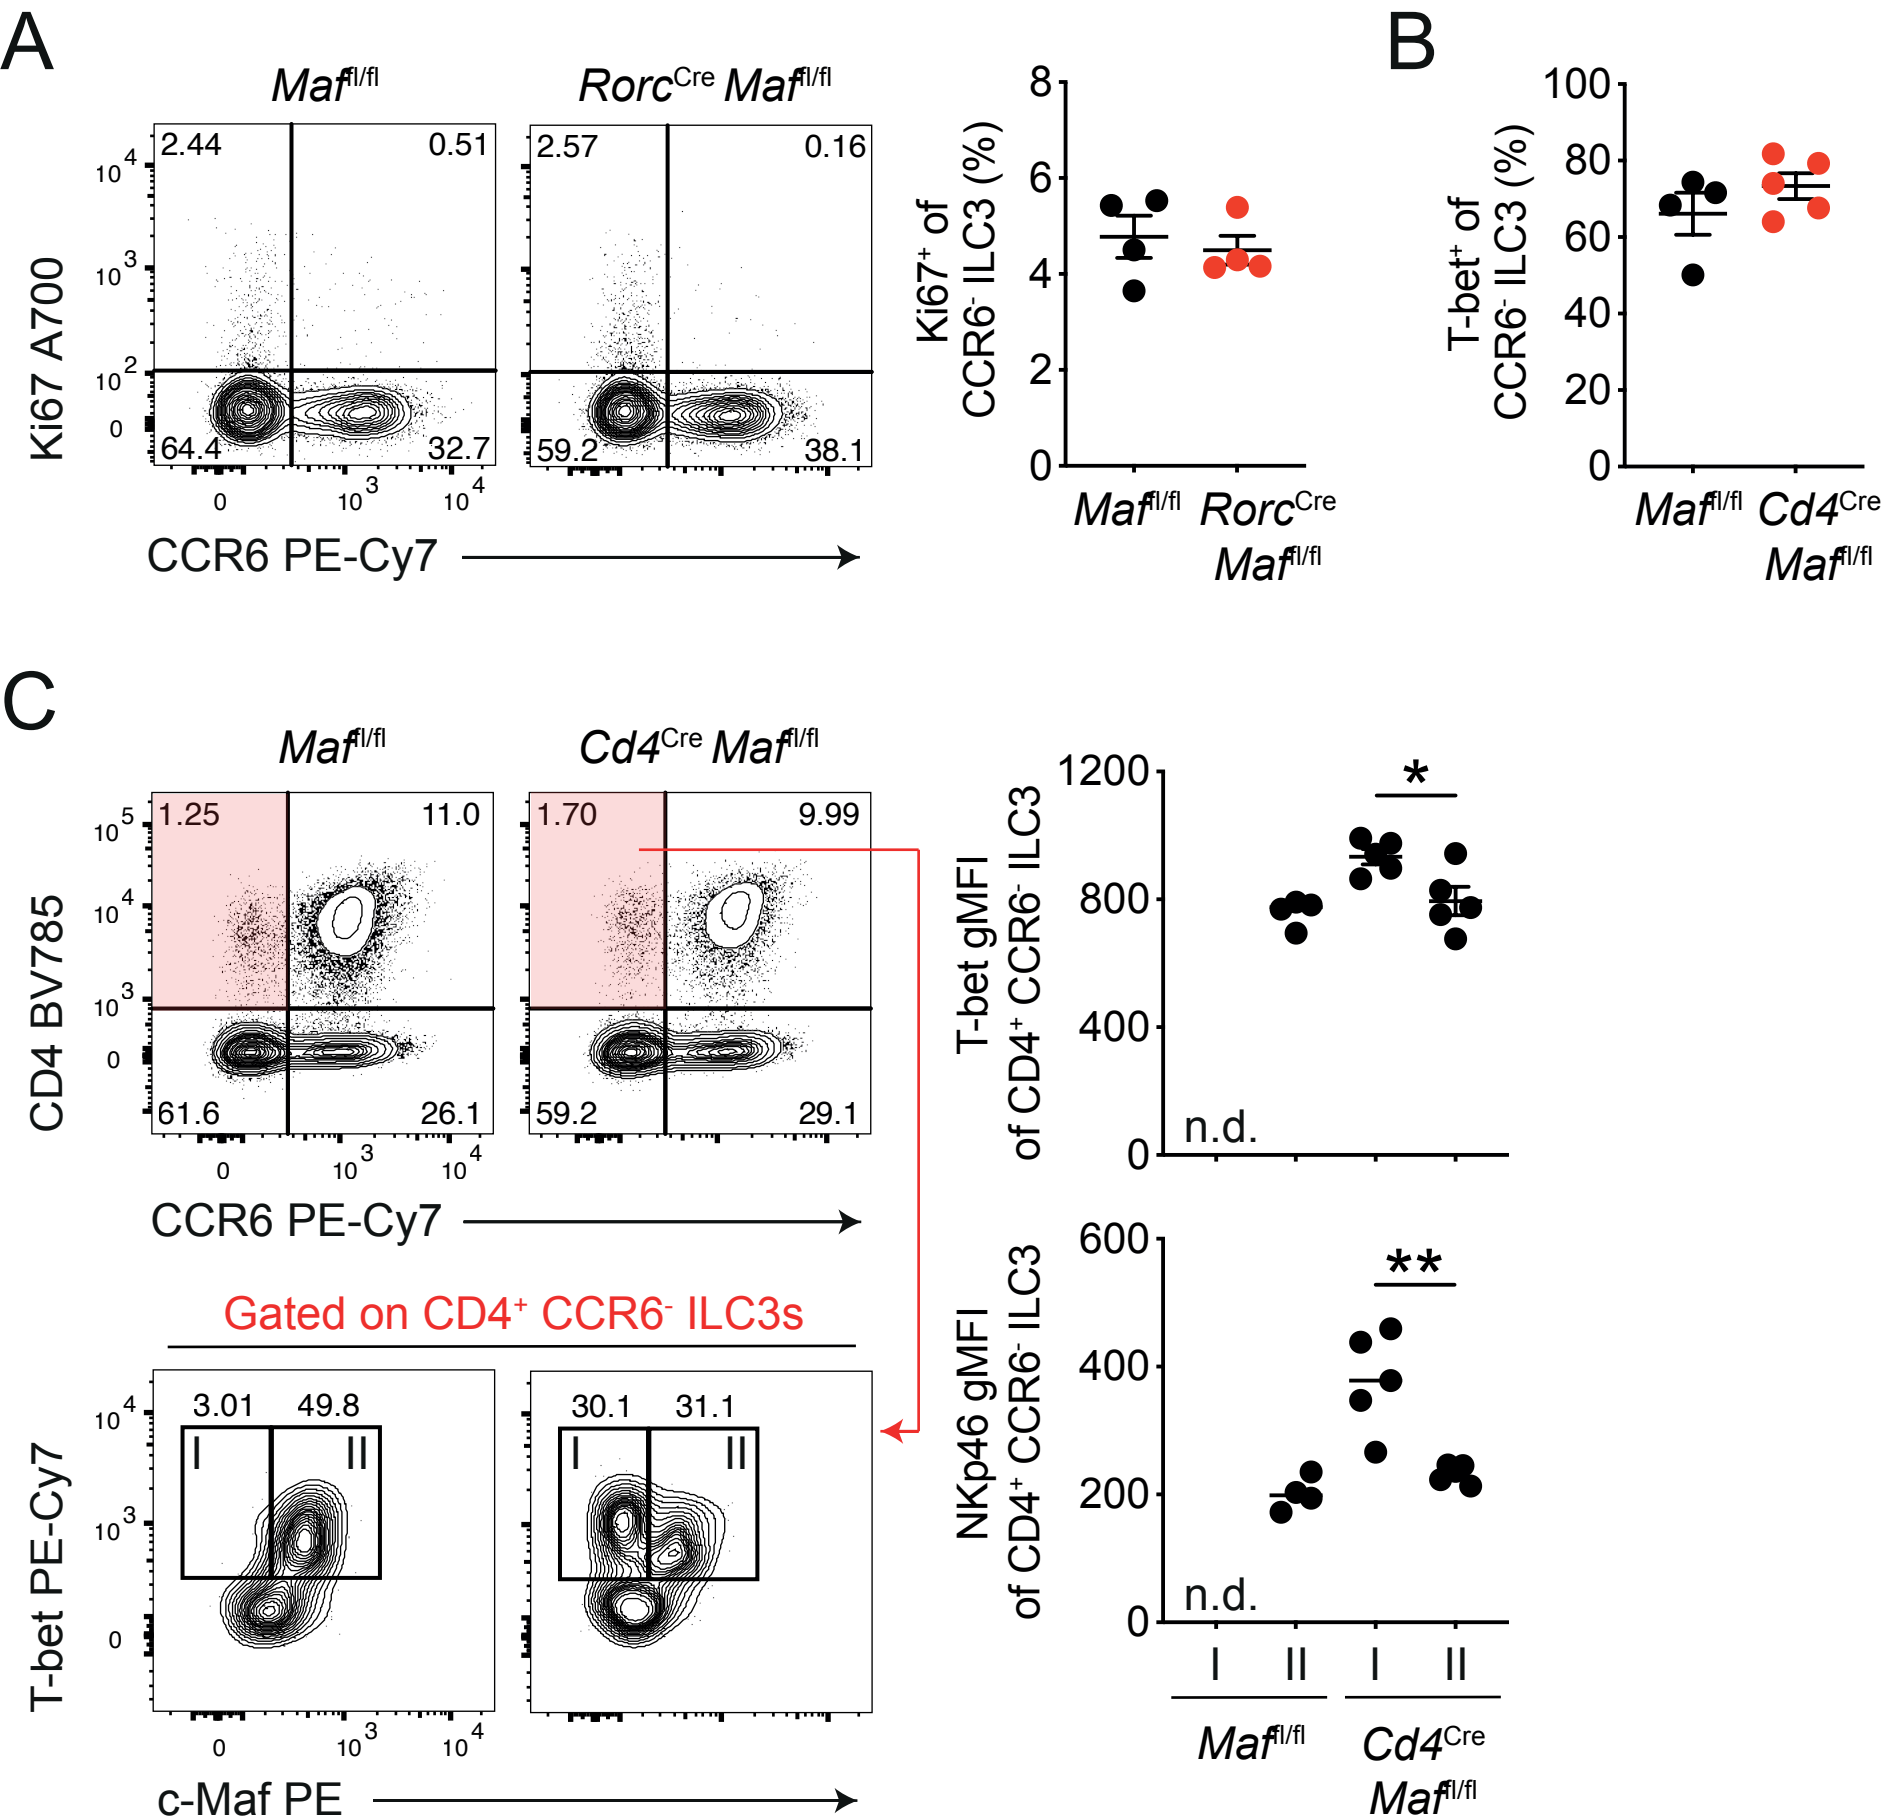

Supplement: supp [file elife-52549-supp-v1.zip]

Figure 3 - figure suppl 3 revised Tizian et al.

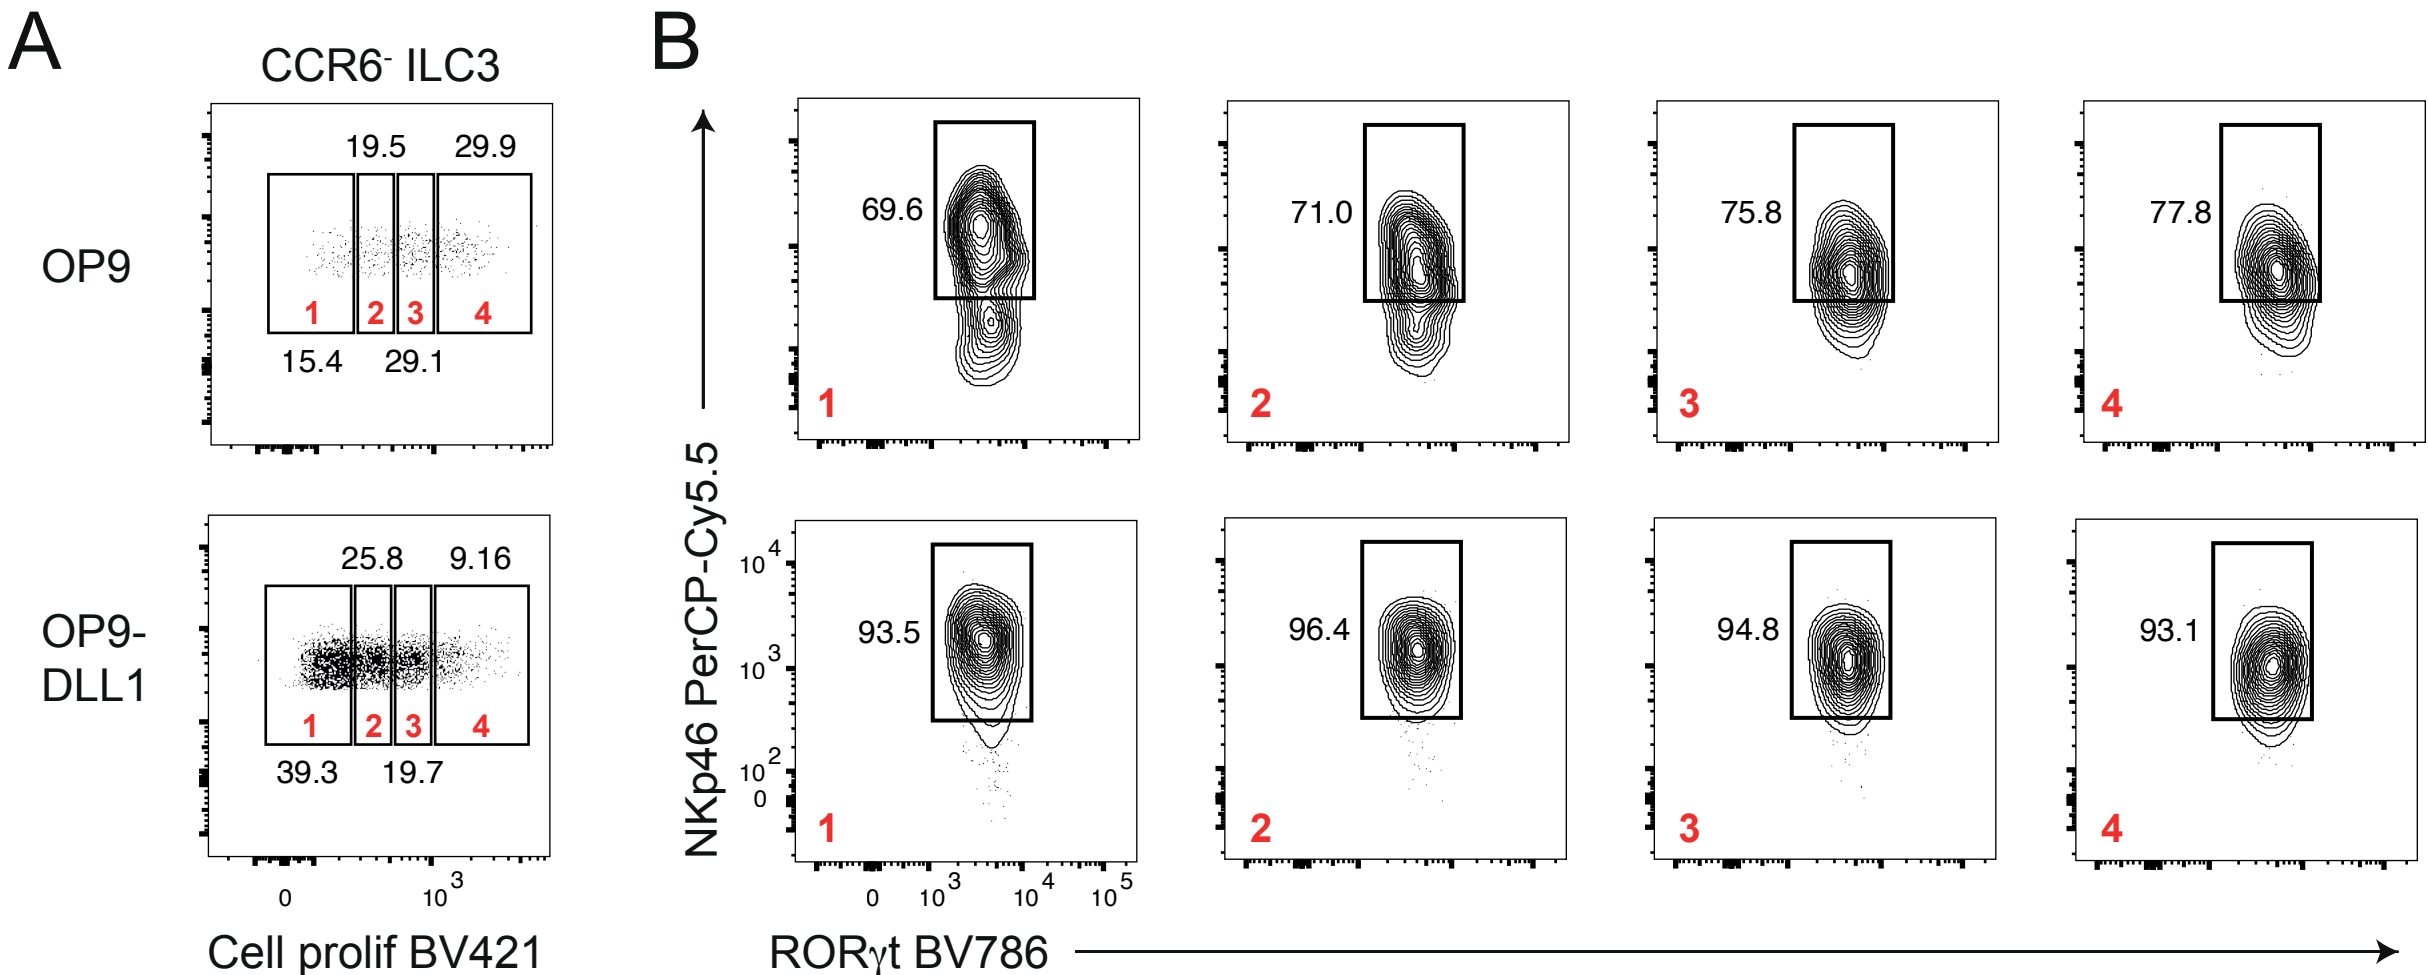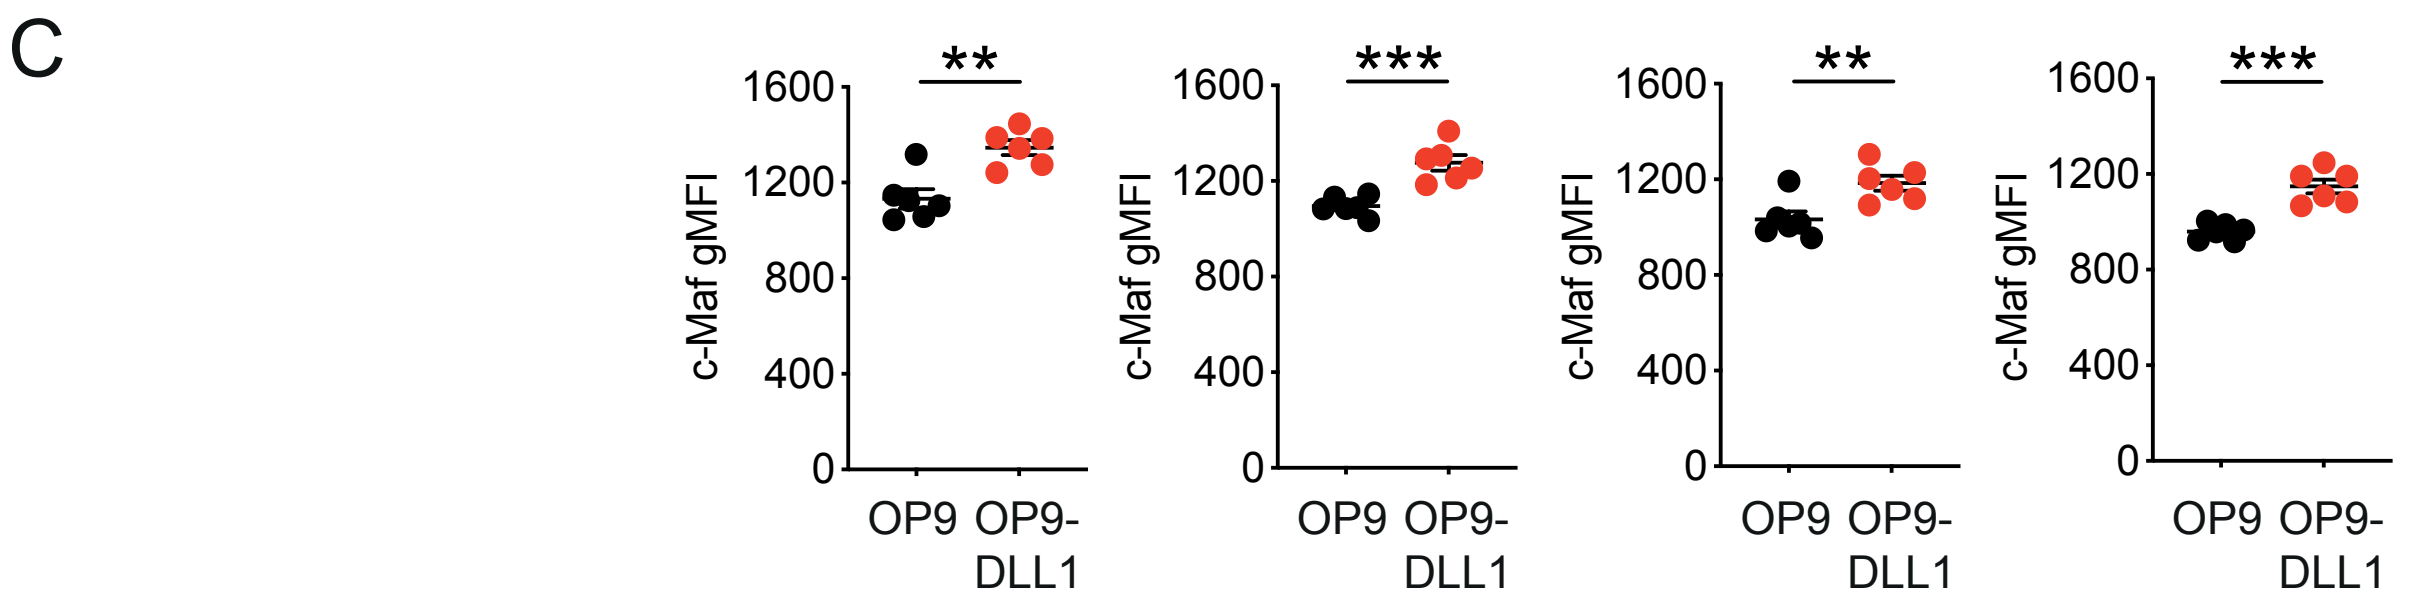

Supplement: supp [file elife-52549-supp-v1.zip]

Figure 2 - figure suppl 2 revised Tizian et al.

A

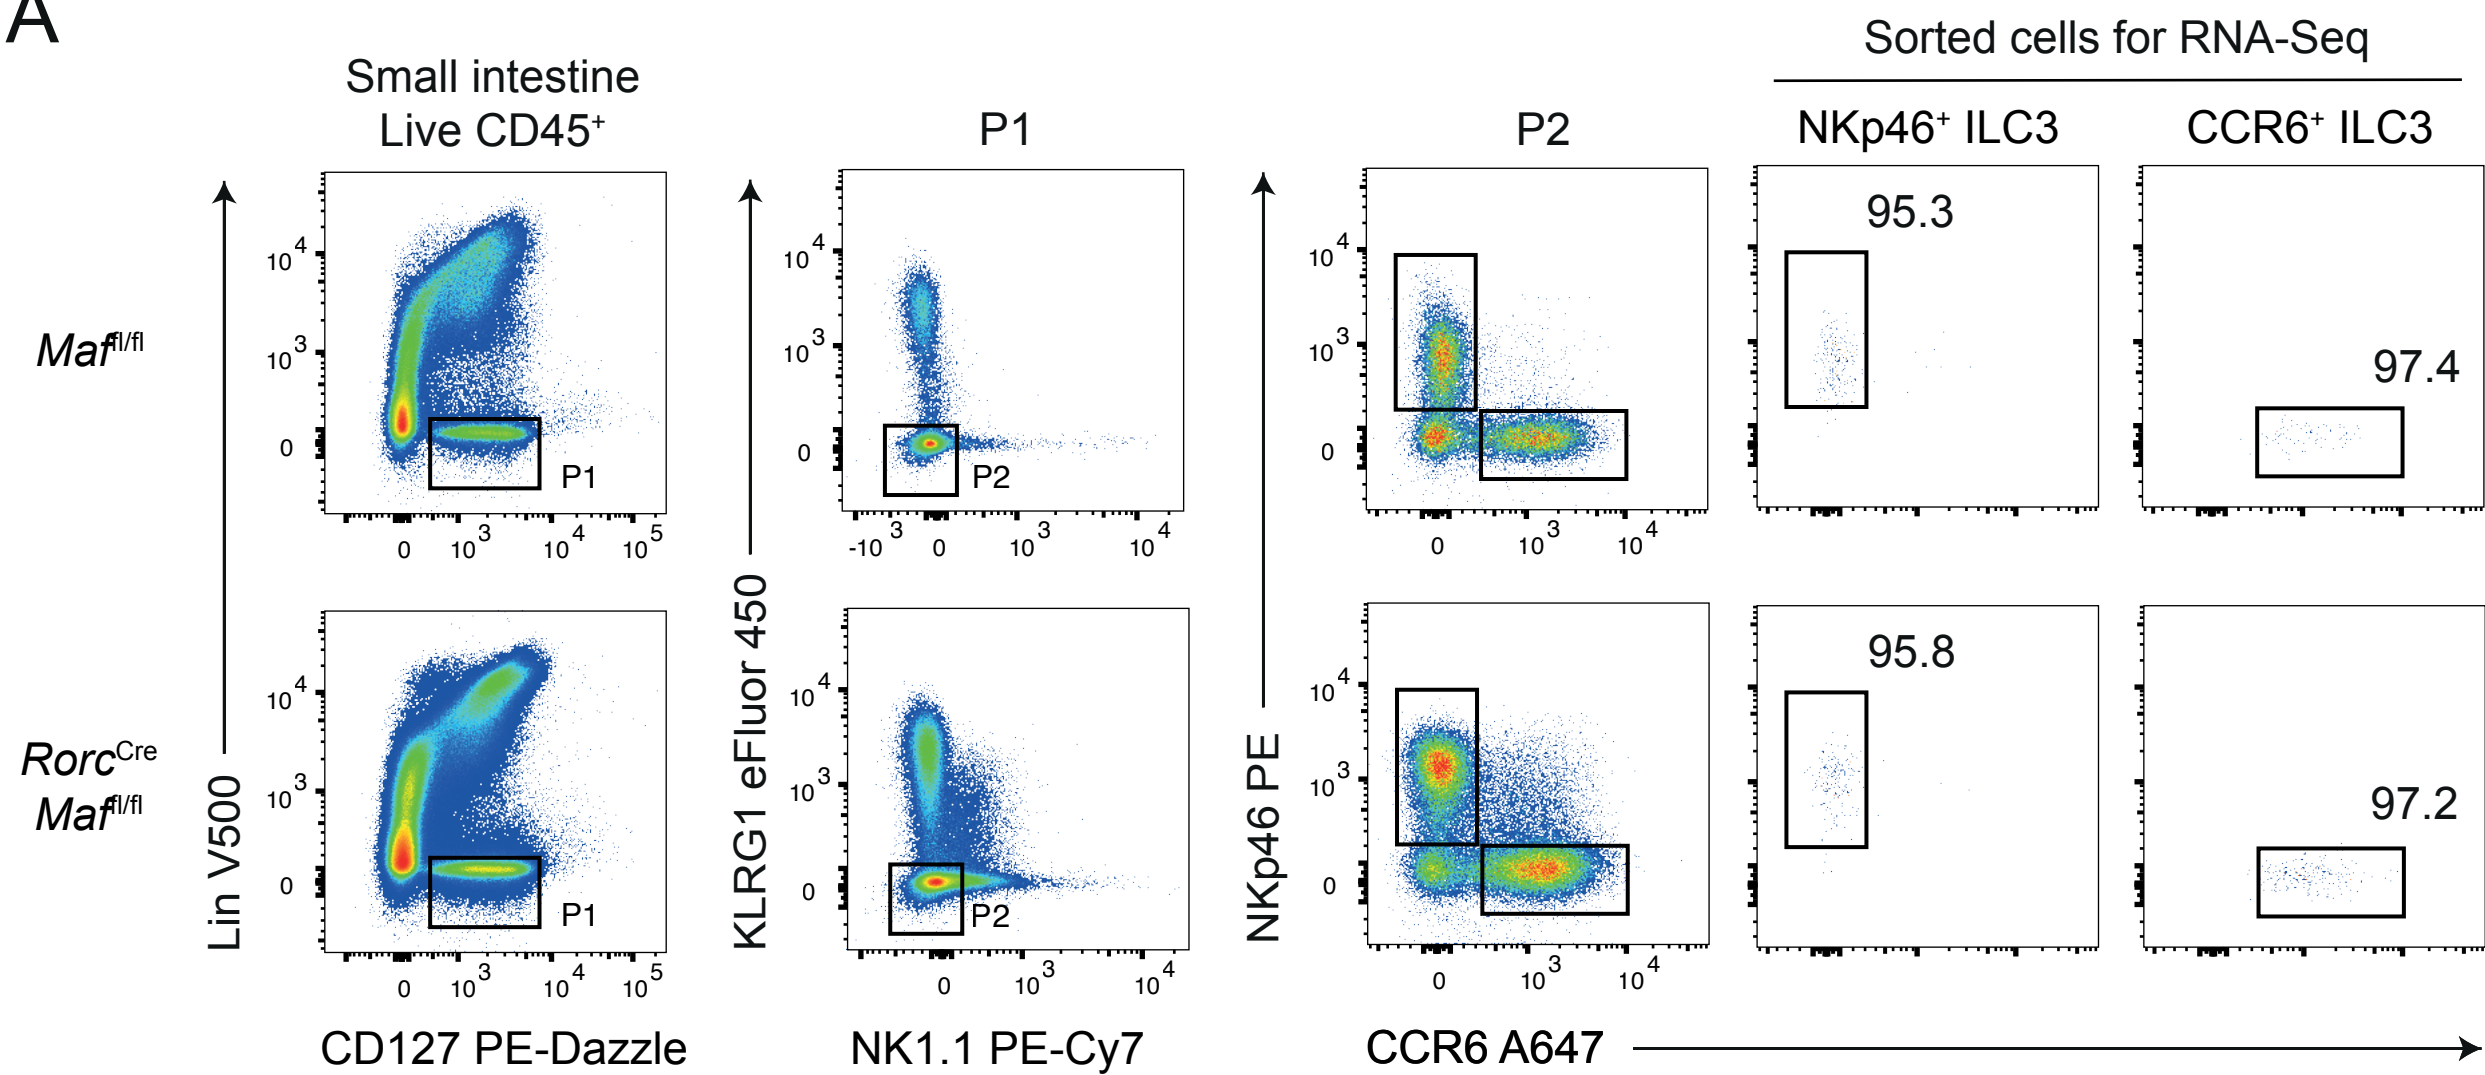

B

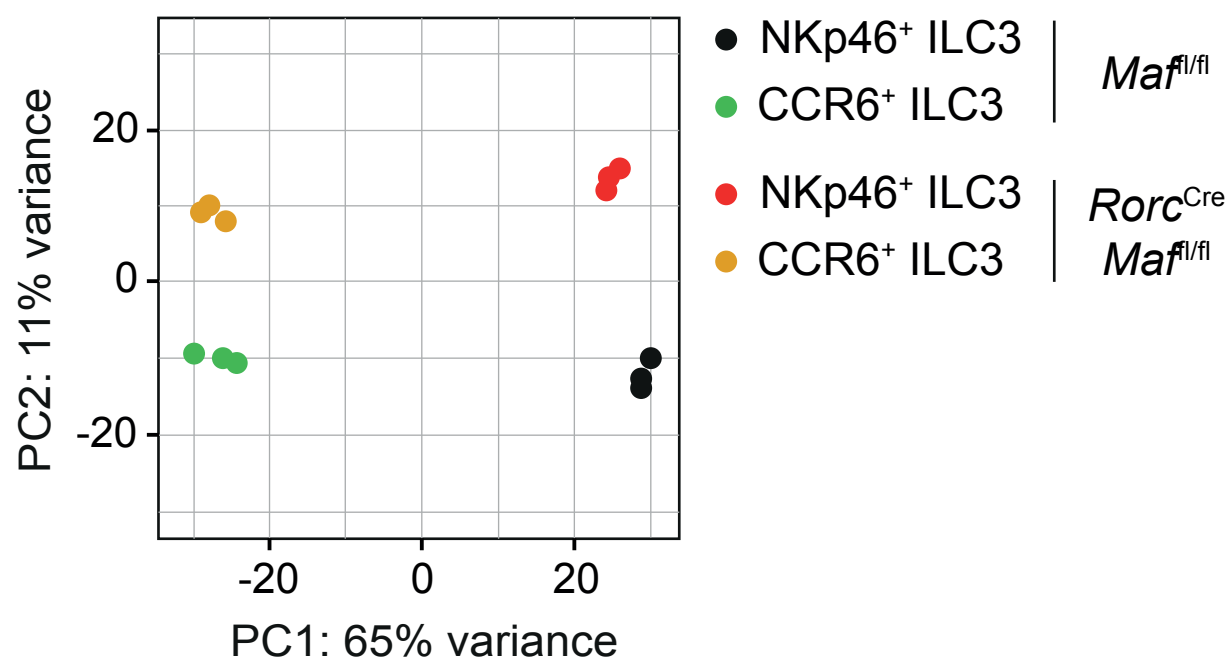

C

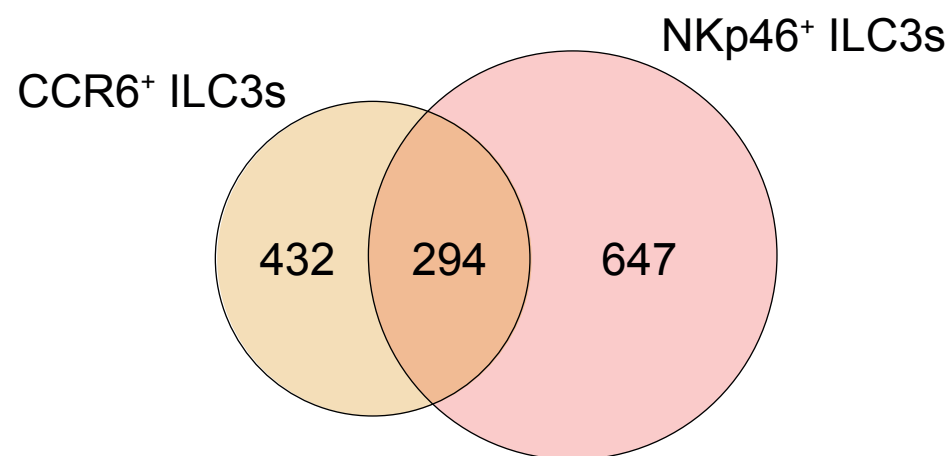

D

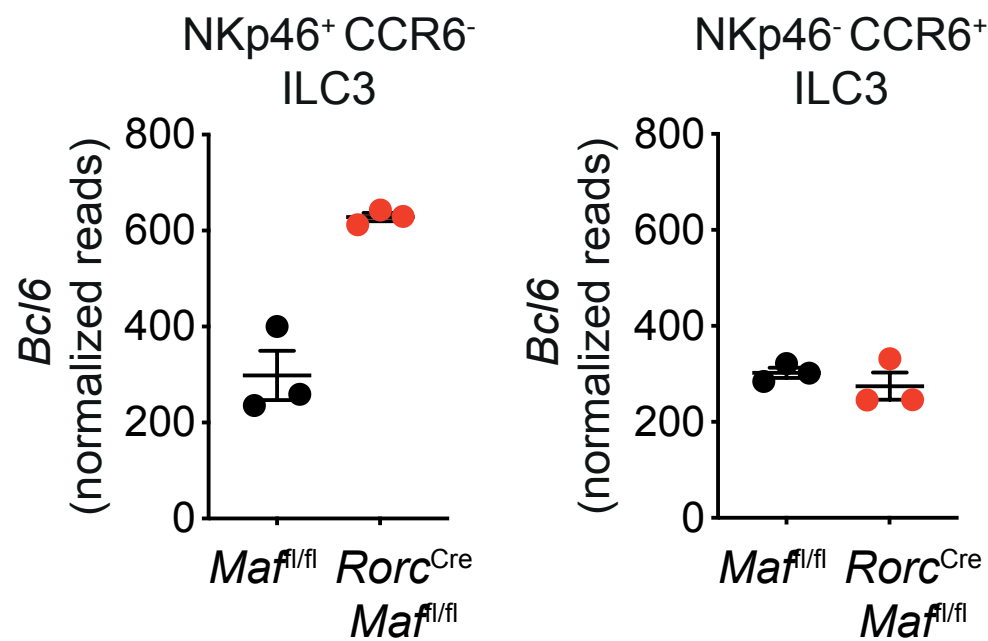

E

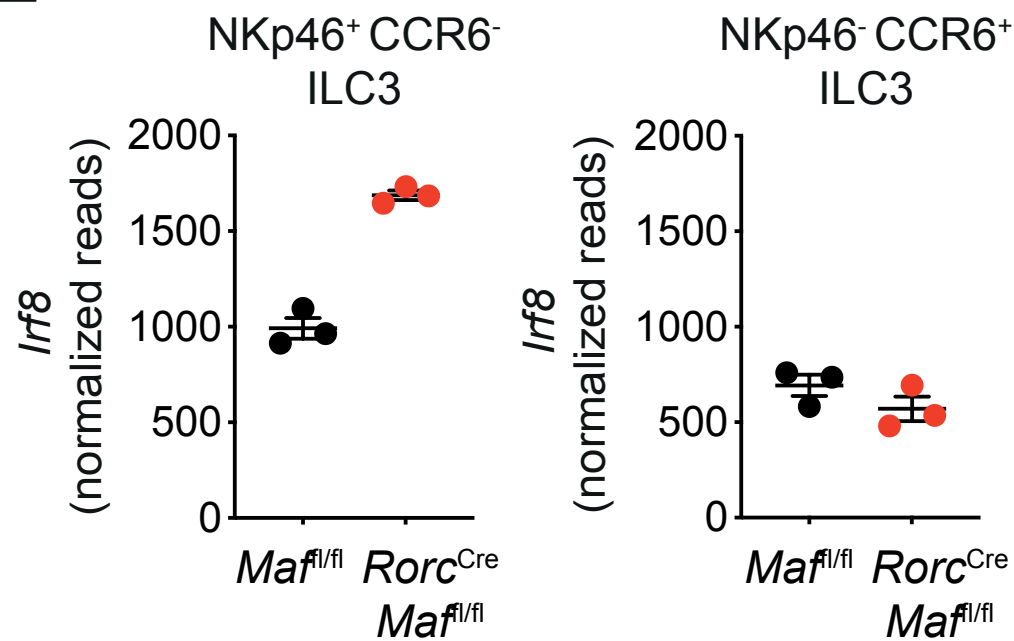

Supplement: supp [file elife-52549-supp-v1.zip]
